# Supplementary material for: Global Correlates of Cardiovascular Risk: A Comparison of 158 Countries
Source: Preprints.org preprint supplement (doi:10.20944/preprints201802.0066.v1), 2018-02-08
Supplement: Supplementary file 1 [file 0-Supplementary dataset_Global correlates of CVD risk.xlsx]

## Sheet: 1-Plant food consumption
	Mean annual consumption (supply) of plant foods between 1993-2011 (per capita)
	Source: http://www.fao.org/faostat/en/#data/CC
		FRUITS TOTAL	APPLES	GRAPES	ORANGES & MANDARINS	ALCOHOLIC BEVERAGES TOTAL	BEER	DISTILLED BEVERAGES ᴬ	FERMENTED BEVERAGES	WINE	COFFEE	REF. SUGAR & SWEETENERS TOTAL	REFINED SUGAR	VEGETABLES TOTAL	TOMATOES	LEGUMES	LEGUMES (incl. SOYBEANS)	CEREALS TOTAL	MAIZE	RICE	WHEAT	STARCHY ROOTS TOTAL	POTATOES	OILCROPS	PLANT OILS	SUNFLOWER OIL	TREENUTS	PLANT PROTEIN	PLANT FAT	% CC energy	% SRC energy	% CC energy & % SRC energy	% CA energy	% ALCOHOLIC BEVERAGES ENERGY	% PLANT FOOD ENERGY
		g/day	g/day	g/day	g/day	g/day	g/day	g/day	g/day	g/day	g/day	g/day	g/day	g/day	g/day	g/day	g/day	g/day	g/day	g/day	g/day	g/day	g/day	g/day	g/day	g/day	g/day	g/day	g/day	% total energy	% total energy	% total energy	% total energy	% total energy	% total energy
Argentina	AMERICA	241.474	40.3684	2.89474	77.8421	191.895	97.7368	4.89474	0	89.4211	2.94737	128.316	100.474	193.474	51.8421	3.10526	3.10526	337	24.3158	17	292.368	157.632	130.895	2	39.1053	29.5263	1	35.8316	43.9895	27.7086	3.00055	30.7091	55.8044	3.53344	66.4843	Argentina
Bahamas	AMERICA	606.158	52.3684	14.9474	234.947	87.0526	32.1053	40.1053	1.68421	13.8947	7.52632	123.474	84.8947	318.263	49.0526	1.57895	1.57895	217.421	11.3158	61.7895	114.263	78.5789	63.4211	1.57895	13.2632	0	4	28.9947	27.2632	21.7267	1.7065	23.4332	56.5954	5.35897	62.5737	Bahamas
Barbados	AMERICA	273.684	45.2105	15.7895	97.2632	131	102.211	12.7368	1.05263	13.8947	4.73684	150.211	131.632	194.526	14	20.3684	20.3684	263.421	35.8421	41.5263	179.211	149.842	113.211	29.4211	25.6316	0.631579	3.68421	36.4211	45.8579	24.7857	3.07316	27.8589	58.8603	2.93398	72.8149	Barbados
Belize	AMERICA	670.053	8.89474	2.89474	216	98.1579	83	13.9474	0.631579	2.84211	6.15789	119.737	106.421	126.474	13.1579	28.5789	34.1053	335.105	64.2105	82.2632	178.105	51	37.9474	21.7895	7.47368	3.89474	8.31579	42.6316	25.9	32.5848	1.45096	34.0358	66.7209	2.69765	76.1242	Belize
Bolivia	AMERICA	225.789	5.78947	6.26316	45.4211	71.5263	65.4211	4.42105	0.0526316	1.47368	6.63158	74.2105	67.2632	127.105	23.4211	6.47368	6.47368	317.737	102.789	64.4737	141.842	199.842	136.947	2.15789	10.5789	3.05263	16.6842	33.0211	17.8842	38.7486	5.95385	44.7025	69.5176	1.7949	80.5511	Bolivia
Brazil	AMERICA	295.263	11.9474	8.94737	102	142.947	127.579	10.5263	0	4.94737	7.63158	121.526	106.789	117.579	45.9474	45.0526	52.8947	300.526	58.8947	99.9474	136	166.947	41.2105	39.5263	43.1579	0.894737	1.10526	40.3737	52.7789	27.3006	4.18648	31.4871	59.7158	2.6842	75.6609	Brazil
Canada	AMERICA	345.421	49.8947	27.7368	132.895	267	192.895	3.68421	45.4211	25.1053	14.9474	139.158	96	328	80.6316	20.4737	22.2632	307	42.1053	21.0526	236.211	220.632	217.211	18.7368	67	1.78947	9	44.8684	75.8421	20.3512	3.35083	23.702	50.4303	3.71973	69.7631	Canada
Colombia	AMERICA	287.105	4.05263	2.78947	21.0526	102.737	93.5789	8.52632	0	0.526316	3.89474	116.158	77.3684	96.3158	26.3158	19.1053	20.8421	269.632	99.2632	85.2105	79.9474	223.684	111.895	11.3684	35.1579	1.42105	0	32.5737	42.1526	28.9284	6.2161	35.1445	65.0531	2.28011	79.5785	Colombia
Costa Rica	AMERICA	358.632	13.3158	4.94737	51.2105	58.6316	34.2632	21.0526	0	3.21053	12.3158	156.842	132.368	121.368	39.5263	27.8421	35.3684	289.105	23.1053	140.421	113.842	73.7895	45.6842	13.9474	36.1053	1.47368	1.52632	35.6842	45.8947	28.567	1.88373	30.4508	64.0098	2.74839	77.5818	Costa Rica
Cuba	AMERICA	372.947	0.631579	0.684211	63.5263	70	51.3684	15.7895	0	2.57895	4.05263	159.789	146.474	308.737	103.842	54.0526	58.3158	345.842	41.6842	162.211	141.684	222.684	67.9474	21.3158	19.0526	1.89474	0	46.6842	29.4684	32.7051	6.49527	39.2003	73.8663	1.6597	85.579	Cuba
Dominican Republic	AMERICA	396.684	2.42105	1.78947	27.4737	117.053	100.684	14.4737	0	1.84211	8.68421	103.211	93.1053	116.105	63.8947	22.6316	22.6316	204.263	19.3684	121.105	62.1053	65.4211	10.5263	22.4737	44.8947	2.68421	0	26.1789	53.5526	25.4582	2.49511	27.9533	61.1045	4.0861	80.6043	Dominican Republic
Ecuador	AMERICA	491.211	10.4211	3.15789	23.7895	49.7895	45.6842	2.84211	0	1.21053	3.47368	55.2632	48.3684	64.0526	13.4211	8.94737	8.94737	253.737	11.9474	132.368	99.6316	85.6842	70.8947	2.94737	40.6842	0.684211	0	26.2105	46.0632	29.7688	2.44239	32.2112	56.2687	1.22268	73.8739	Ecuador
El Salvador	AMERICA	171.474	8.47368	2.57895	37.8421	58.8421	49.8421	8.31579	0	0.789474	5.47368	109.263	94.4211	136.105	32.7895	35.7368	37.3158	379.105	216.737	27.2105	83.4737	54.8421	25	25.2632	15.3684	2.36842	0.947368	45.3789	33.4421	40.8113	1.70511	42.5164	69.1261	1.72945	84.5481	El Salvador
Guatemala	AMERICA	180.737	5.84211	5	34.2632	28.1579	23.7895	3.78947	0	0.368421	5.42105	130.105	114.368	146.947	42.3158	31	32	367	257	13.3684	89.8421	24.7895	21.2632	8.26316	17.4737	2.68421	5.42105	43.5684	34.9474	40.9204	0.585201	41.5056	70.5152	0.856657	89.4686	Guatemala
Guyana	AMERICA	159.316	1.63158	1.10526	22.6842	65.4737	50.4211	14.8421	0	0.0526316	1.31579	101.368	84.5789	165.263	13.2105	17.2105	18.2632	384.211	4.26316	222.632	154.474	119.053	28.1579	85.0526	10.8947	0	0.526316	41.3	30.8316	41.2331	3.88867	45.1218	70.1867	2.32956	82.1414	Guyana
Haiti	AMERICA	211.421	0	0	10.6316	22.8947	0.473684	22.2105	0	0	7.94737	55.7368	45.1579	70.4737	5.47368	30.6842	30.6842	262.263	63.9474	105.316	78.5789	207.368	2.94737	14.0526	19.4737	0.157895	0	34.9053	30.1895	38.9772	8.83894	47.8161	72.8218	3.45805	89.7221	Haiti
Honduras	AMERICA	202.105	4.10526	1.26316	38.6842	48.9474	42.4737	6.05263	0	0.368421	12.2105	115	94.3158	114.368	27.7895	26.0526	26.0526	351.632	220.579	32.9474	86.5263	16.2632	10.0526	6.36842	28.3158	0.157895	0.947368	39.0632	42.6	37.7496	0.453345	38.2029	65.5231	1.3391	83.6669	Honduras
Chile	AMERICA	157.263	19.2632	20.1579	18.3158	122	75	5.26316	0	41.6316	1.52632	124.632	111.474	263.211	63.4737	10.4211	10.4211	375.632	43.7895	21.0526	305	157.947	156.579	3.84211	25.4211	7.84211	1.68421	41.4	34.3263	34.4511	3.48453	37.9356	62.8615	2.47624	74.9545	Chile
Jamaica	AMERICA	359.105	6.05263	4.31579	123.053	71.8947	61.2632	9.21053	0	1.42105	4.47368	141	115.842	207.316	24.2105	8.10526	8.10526	271.474	19.8421	68.6316	177.053	228.789	23.7895	41.4211	30.0526	0	0.631579	37.4684	45.0421	27.1717	6.49924	33.6709	63.3447	1.95265	79.2296	Jamaica
Mexico	AMERICA	287.684	15.7368	5.21053	92.9474	139.053	136.105	2.52632	0	0.105263	2.73684	132.684	111.526	158.842	44.1053	34.0526	34.0526	451.947	327.789	14.5263	97.7895	42.1579	38.0526	6.78947	28.2632	3.31579	4	48.0211	46.2737	36.3268	0.861046	37.1879	63.341	1.8608	79.5468	Mexico
Nicaragua	AMERICA	100.789	14.7368	0.473684	36.2105	33.5263	26.6842	6.63158	0	0.0526316	3.78947	100.737	88.2632	23.5789	2.94737	45.2632	45.2632	344.526	148.895	123.632	63.7368	37.5789	19.9474	7.26316	23.1053	0.947368	0.0526316	40.1105	35.0895	42.5194	1.21061	43.73	69.5341	1.29568	87.9791	Nicaragua
Panama	AMERICA	219.737	16.4211	6.68421	24.7368	157.053	146.474	8.15789	0.157895	2	5.42105	81.7368	65.3684	74.3684	23	14.8947	16.0526	317.526	68.3684	144	99.8421	60.5789	25.7895	11.2105	26.4737	1	0.842105	30.7895	34.4263	36.22	1.87488	38.0949	63.4885	3.34661	75.7528	Panama
Paraguay	AMERICA	234.684	2.15789	2.73684	120.316	145	116.368	13.4211	2.31579	12.8947	2	69.4737	60.4211	150.211	35.4211	29.6842	29.6842	239.316	145.579	25.9474	66.8421	412.737	4.21053	9.63158	32.2632	4.26316	0.0526316	36.8684	47.3053	23.7943	12.8375	36.6318	58.6628	4.08526	74.3206	Paraguay
Peru	AMERICA	231	11.2632	4.36842	28.9474	93.1579	79.5789	9.31579	0	4.26316	3.73684	54.2632	46.0526	129.842	15.2105	19.1579	21.6316	340.737	57.2105	119.158	149.158	293.947	190.579	9.78947	14.2632	0.947368	0.368421	42.2105	25.0895	38.04	12.6654	50.7054	72.2272	2.48931	84.9706	Peru
Suriname	AMERICA	221.316	0.157895	0	66.8421	124.263	112.211	12.7895	0	1.63158	1.57895	124.789	105	169.842	14.5263	5.36842	5.68421	353.526	2.89474	199.474	148.211	76.8947	49.4737	15.2632	36.2105	2.78947	0	33.4211	45.8737	37.4556	2.03859	39.4942	67.6501	3.05756	83.7923	Suriname
Trinidad and Tobago	AMERICA	190.895	15.4211	11.4737	14.0526	81.3684	69.3158	10	0.315789	1.84211	5	165.842	146.947	87.4737	18.6316	28.2632	28.2632	314.842	17.5789	59.0526	232.263	98	76.2105	24	31.6316	0.0526316	3.73684	36.2053	44.0632	29.8568	2.06334	31.9201	64.6539	2.03073	80.0523	Trinidad and Tobago
United States of America	AMERICA	309.211	60.7368	21.8947	101.263	276.474	240.368	16	0	20.1053	11.0526	183.211	79.2632	339.947	112.632	10.7368	10.7368	306.316	36.2632	19.8947	233.737	171	163.789	14.9474	72.8947	0.578947	8.47368	40.5105	84.8	18.8036	2.4	21.2036	50.6804	4.36112	68.1152	United States of America
Uruguay	AMERICA	212.579	38.8421	7.05263	69.1579	156.737	75.7895	5.21053	1.15789	74.3684	2.68421	95.1579	76.2105	149.211	38.2105	7.89474	7.89474	405.789	69.6316	41.1053	291.158	139.632	96.8421	8.05263	21.0526	6.57895	0.789474	37.0211	28.6158	32.9294	3.30373	36.2331	59.6856	3.32492	67.2465	Uruguay
Venezuela	AMERICA	246.368	3.31579	3.63158	53.6842	223.684	209	13	0	1.52632	7.26316	104.947	93.7368	132	29.9474	15.6842	15.6842	342.368	151.368	52.1053	133.316	97.1053	43.7895	1.05263	40.8421	4.63158	0.473684	33.5526	45.7263	31.8703	2.71384	34.5841	62.9185	4.51648	78.0075	Venezuela
Albania	EUROPE	229.474	35.2632	74.8421	25	57.0526	40.4737	2.89474	0.0526316	13.5263	3.36842	75.7895	46.8421	489.368	125.211	13	13	462.421	9.73684	18.6842	431.158	81.8947	77.9474	26	18.5789	14.0526	7.57895	51.3211	31.8	37.6311	1.77688	39.408	60.1998	1.32749	71.7811	Albania
Armenia	EUROPE	181.842	39.4737	57.5263	7.26316	22.7368	8.26316	8.05263	0	6.36842	5.84211	79.2632	71.2105	546.368	164.789	0	0	434.737	0	10.6842	410	179.316	179.368	1.78947	13.8421	7.36842	1.63158	46.6263	22.0842	42.566	4.29814	46.8641	68.3755	1.30173	80.2917	Armenia
Austria	EUROPE	362.737	135.316	20.5263	48.6842	404.211	302.895	14.4737	2.05263	84.5263	19.7895	128.895	106.421	246.526	39.0526	2	4.94737	300.895	35.0526	10.8947	213.579	161.789	161.789	10.7368	54.4737	11.2105	17.2632	40.1789	69.2	19.5331	2.67472	22.2079	48.8217	6.73477	60.9091	Austria
Azerbaijan	EUROPE	168.368	35.0526	38.7895	7.73684	70.7368	52.4211	17.0526	0	1.42105	0.210526	39.6316	35.4211	334.842	107.789	0	0	590.211	17	8.57895	546.316	157.474	157.421	0.263158	7.42105	1.84211	6.73684	54.9947	17.4316	53.5863	3.65961	57.2459	72.8372	3.01939	83.168	Azerbaijan
Belarus	EUROPE	133.421	56.4211	1.52632	13.3158	138.684	80.5263	34.8421	10.6316	12.6316	1.73684	104.263	92.6842	308.158	52.2105	0	0.315789	369.263	0.631579	6.78947	187.368	497.105	497.105	1.47368	28.3158	18.6316	4.78947	41.7105	42.7105	26.0812	9.506	35.5872	58.0634	5.01124	67.3974	Belarus
Belgium*	EUROPE	253.842	84.2105	12.7895	51.3684	346.105	270.263	5.31579	0.210526	69.7895	15.5263	144.474	121.263	345.211	70.7368	6.52632	6.52632	309.316	6.05263	16.3158	282.789	279.105	279.158	10.3158	61.4211	7.15789	15.5263	39.6	69.8895	18.7794	4.43116	23.2106	50.0783	5.38094	63.165	Belgium*
Bosnia and Herzegovina	EUROPE	157.737	36.1579	10.1579	19.8421	152.368	105.474	40.2632	0.157895	6.42105	8.05263	43.6316	28.9474	472.947	32.1053	17.2105	18.4737	529.368	243.842	3.42105	271.789	209.526	209.579	2.26316	16.3158	12.3158	3.73684	59.9632	32.5526	45.0359	4.2418	49.2777	69.6731	5.96105	79.5631	Bosnia and Herzegovina
Bulgaria	EUROPE	127.316	24.0526	19.1053	12.9474	205.053	154.895	21.5789	0	28.4737	8.94737	84.4737	74.0526	296.421	89.2632	9.15789	9.15789	419.368	40.2632	9.26316	361.421	91.2105	91.1053	10.0526	38.1579	31.6842	2.36842	43.6632	47.0421	33.5011	1.90139	35.4024	58.5641	5.68408	71.873	Bulgaria
Croatia	EUROPE	248.526	47.4737	59.9474	41.8947	306.895	211.474	6.52632	0.315789	88.6316	12.3158	143.684	87	249.316	47.8947	7.52632	7.52632	301.737	24.7368	5.52632	266.895	237.474	237.316	9.47368	31.7368	13.4737	8.63158	36.5316	43.8368	25.2414	5.0408	30.2822	60.2196	6.62547	70.3058	Croatia
Cyprus	EUROPE	277.211	33.3684	32.8421	74.8947	141.526	96.7895	7.68421	1.63158	35.0526	11.2632	99.9474	78.6316	344.368	88.0526	10.6842	10.6842	233.211	4.47368	12.1579	215.842	93.5263	89.2105	25.9474	37.9474	10.2632	11.2105	33	59.5368	20.7378	2.17315	22.911	50.315	3.58056	68.5281	Cyprus
Czech Republic	EUROPE	196.105	40.4737	12.7368	54.4211	468	422.947	18.5789	0.210526	26.1053	8.84211	119.947	96.1053	204.579	29.4737	6.05263	7	331.316	0.0526316	11.9474	276.579	206.263	206.158	7.47368	48.6842	5.78947	4.84211	38.3421	59.6	23.3449	3.74663	27.0916	54.7805	8.69806	64.7296	Czech Republic
Denmark	EUROPE	284.947	74.3158	23.1053	85	352.684	261.526	9.52632	1.94737	79.6842	24.7368	146.263	106.579	257.947	46.4737	3.05263	3.05263	339.211	16.4211	9.73684	254.105	207.737	207.421	4.94737	23.6842	1.84211	11.2632	38.7579	35.8158	20.7019	3.59459	24.2965	52.0028	6.32134	57.592	Denmark
Estonia	EUROPE	187.895	51.8947	16.3684	38.1053	256.105	194.526	35.3158	7.89474	18.7895	12.8947	115.684	97.9474	221.895	32.8421	7.42105	7.42105	348.895	13.1053	6.10526	218.263	322.474	322.474	0.105263	21.5789	3.57895	5.10526	40.0158	35.4895	25.2239	6.15473	31.3787	60.617	7.06288	65.212	Estonia
Finland	EUROPE	227.947	58.4737	13.6316	65.6316	278.579	236.526	14.4737	3.36842	24.1053	31.7368	97.5263	81.7368	202.316	42.7368	3.26316	3.26316	290.211	0	12	202.684	189.421	189.316	4.42105	28.3684	2.47368	3.68421	39.0895	36.2211	22.2841	3.70486	25.9889	50.5846	5.58189	56.4476	Finland
France	EUROPE	274.737	30.1053	11.7368	108.684	261.632	82.5263	6.63158	27.5789	144.737	15	107.105	90.1579	289.895	65.3684	5.47368	5.47368	321.474	34.3684	13.0526	270.474	174.053	173.947	7.26316	50.5263	19.2632	10.2632	39.5474	61.9947	20.7887	2.85319	23.6419	45.6175	4.8247	58.5875	France
Georgia	EUROPE	133.158	33.1579	12.0526	29.9474	64.5263	21.7895	1.78947	0	41.1579	3.05263	81.3158	73.1053	214	81.4211	0.157895	0.157895	535.211	101.316	2.84211	410.474	134.368	134.368	0.526316	13.8947	8.57895	8.89474	49.2158	25.0737	47.822	3.02412	50.8462	70.0626	1.66806	81.5619	Georgia
Germany	EUROPE	237.158	74.6316	23.7895	28.1053	390.158	309.474	19	0.631579	60.8947	17.8947	124.474	92.8947	236.632	40.4211	2.73684	4.15789	282.737	24.4211	7	210.632	199	199	8.42105	47.0526	7.73684	14.0526	38.3842	60.0421	19.9162	3.51799	23.4342	51.1817	7.41595	61.5886	Germany
Greece	EUROPE	426.158	45.6842	73.0526	127	173.526	100.158	11.6842	0	61.2632	11.3684	86.0526	71.7895	719.263	316.526	13.1579	13.1579	386.526	4.57895	18.1579	355.158	202.158	201.421	41.0526	71.5789	13.8421	30.3684	52.0421	90.4684	23.2385	3.36878	26.6073	50.1527	3.53629	73.1602	Greece
Hungary	EUROPE	191.263	66.2632	19.3684	25.4211	299.842	199.789	18.1053	0.684211	81.2632	6.42105	106	75.7368	283.263	55.4737	9.68421	9.68421	283.105	1.63158	9.84211	268.053	175.211	175.211	2.57895	44.4211	30	1.21053	36.7211	52.1421	20.6068	3.36661	23.9734	50.5958	6.70187	61.6303	Hungary
Iceland	EUROPE	286.789	55.7368	25.5263	89.4737	177.526	142.368	8.42105	2	25.0526	24.0526	143.368	106.526	156.789	29.4211	0	0	220.474	0	8.84211	188.316	159.158	159.632	0.947368	11.7368	1.73684	3.78947	35.6684	39.2368	15.1148	2.72642	17.8412	47.3405	3.48699	53.4601	Iceland
Ireland	EUROPE	273	28.6316	20.0526	129.211	514.053	458.211	23.2105	2.05263	30.6316	6.42105	113.316	85.1053	217.211	31.5789	7.68421	7.78947	353.737	37.6842	8.73684	285.368	312.474	312.316	6.36842	42.5789	7.84211	3.36842	43.3789	53.1842	22.8732	4.77688	27.6501	54.5795	8.76006	60.6456	Ireland
Italy	EUROPE	382.842	54.0526	37.3684	115.105	208.368	73.5263	2.52632	0	132.368	14.8947	84.0526	72.9474	464.421	160.263	14.8947	14.8947	433.526	11.0526	15.2632	405	109.316	108.579	7.94737	71.7895	11.1053	18.1053	50.8789	82.5526	26.7481	1.75326	28.5014	49.6994	3.71901	70.3315	Italy
Latvia	EUROPE	140.211	45.5789	10.7895	18.8421	181.368	140.789	25.8421	1.63158	13.7368	10.2105	104.526	83	268.053	26.3684	0	0	350	1.36842	6.05263	205.158	337.316	337.263	2.94737	31.3158	5.26316	4.63158	39.7316	42.6789	26.4774	6.5042	32.9816	57.0741	5.08365	65.8757	Latvia
Lithuania	EUROPE	165.737	80.5789	6.47368	29.2105	237.368	191.158	24.3158	4.78947	16.7895	9.52632	107.474	75.1053	263.895	21.7895	10.7895	10.7895	449.053	1.05263	6.63158	333.105	325.947	326.158	3.26316	20.7895	6.21053	3.15789	50.6053	28.6053	32.8544	5.98771	38.8421	62.4994	5.57327	68.2201	Lithuania
Luxembourg*	EUROPE	474.737	101.211	12.2632	199.526	447.947	293.789	28.2632	1.10526	125.632	33.9474	132.105	58.7368	285.632	58.2632	3.21053	3.21053	302.474	21.1579	9.10526	247.526	196.474	196.263	4.94737	51.8947	5.15789	4.94737	37.8316	65.1105	18.3543	3.13444	21.4887	49.7953	8.90075	58.1837	Luxembourg*
Macedonia	EUROPE	256.684	45.6842	89.1579	27.1579	105.684	81.7895	8.36842	0.315789	15.4737	8	98.6842	85.3684	456.684	117.368	16.1579	17	379.474	71.4737	6.05263	300.263	143.632	143.474	10.2632	33.2632	31.4737	8.05263	45.0053	49.4211	31.536	3.04992	34.5859	60.5051	2.74483	78.0281	Macedonia
Malta	EUROPE	260.211	40.2105	35.7895	65.3158	150.632	114.316	7.52632	1.57895	29.7895	8.89474	146.211	123.684	505.105	123.895	16.9474	16.9474	411.895	12.3684	12.3684	381.684	187.316	187.421	11.5789	23.5263	6.15789	10.1579	50.5895	43.2947	26.5603	3.08119	29.6415	57.881	2.99506	70.3468	Malta
Moldova	EUROPE	144.526	42.3158	39.6842	4.78947	99.1579	48	6.63158	0	44.3158	1.31579	75.8947	59.4737	269.053	70.2632	1.68421	1.68421	472.421	247.737	7.05263	204.579	184.579	184.526	1.05263	18.5263	14.9474	4.10526	40.9842	26.8579	42.2457	4.23314	46.4788	68.4927	2.92774	76.5618	Moldova
Netherlands	EUROPE	353.263	90.0526	33.5263	113.053	280.316	226.632	8.57895	0.315789	44.8947	21.4737	129.632	115.421	237.789	36.8421	4.52632	4.84211	211.474	7.57895	9.05263	180.158	247.947	246.895	10.8421	46.8421	4.21053	17.3684	33.4789	57.2263	15.3584	4.49314	19.8515	48.915	5.13724	60.0491	Netherlands
Norway	EUROPE	325.737	63.4211	24	132	192.158	149.579	6.36842	2.05263	34.5263	26.2105	115.263	98.1579	189.474	37.7895	4.89474	4.89474	337.263	0	11.0526	270.368	191.526	191.474	4.94737	43.8421	2.63158	8.78947	41.3	55.8	23.4611	3.35859	26.8197	50.0171	3.42024	63.4128	Norway
Poland	EUROPE	133.947	45.8947	9.15789	15.2632	230.316	189.474	13.2105	22.6316	5	6.94737	120.474	109.105	345.211	39.2632	5.63158	5.63158	415.947	0	4.47368	299.316	354.211	354	4.21053	33.0526	3.26316	2.42105	49.3579	40.9368	29.4749	6.22739	35.7023	58.2118	4.32368	68.8599	Poland
Portugal	EUROPE	310.737	73.0526	16.5789	73.4211	328.842	163.053	28.4211	0.684211	137.053	10.8421	84.3684	69.7368	483.684	135.737	10.8947	10.8947	352.632	26.2632	43.7895	264	247.895	246.368	6.63158	49.5263	14	12.8421	45.6053	62.4737	23.9337	4.11414	28.0479	53.3679	7.32483	64.3644	Portugal
Romania	EUROPE	161.579	64.3158	17.0526	11.4737	235.105	164.053	7.84211	0	63.1053	5.10526	71.4211	61.7368	444.105	103.737	5.21053	5.21053	496.895	107.947	8.36842	374.684	241.842	241.789	4	32	28.4211	3.47368	54.0053	42.3842	35.3896	4.43142	39.821	60.8915	4.5496	71.3335	Romania
Russian Federation	EUROPE	132.158	44.3158	5.05263	16.5789	167.789	127.526	25.4211	0.105263	14.8421	4	119.737	102.632	252.474	48.5263	4.26316	4.26316	413.211	1.42105	12.0526	360.526	315.474	315.474	3.15789	27.5789	24.4737	1.57895	45.7211	34.9368	32.5109	6.12575	38.6367	63.0576	4.8194	71.8067	Russian Federation
Serbia**	EUROPE	246.263	33.9474	26	15.1579	203.474	142.263	16.6316	0.105263	44.5263	7.52632	71.8947	58.8421	306.526	50.3684	22	22	303.684	46.4737	2.73684	248.737	105.947	106.053	2.15789	28.7368	23.7368	6.47368	38.0421	37.3947	26.4264	2.27957	28.706	54.1011	5.38916	63.0517	Serbia**
Slovakia	EUROPE	166.105	23.2105	12.6842	39.2105	268.789	229.053	18.1579	2.15789	19.4737	10.0526	112.789	88.4737	227.895	33.2105	7.21053	7.21053	341.632	0.105263	12.7895	298.158	196.053	196.053	6.36842	31.0526	7	5.26316	38.2	41.6474	27.5197	4.03649	31.5561	57.2754	6.30387	67.7348	Slovakia
Slovenia	EUROPE	343.105	99.6316	83.4737	40.7368	289.211	217.947	6.21053	6.89474	58.2105	16.5789	59.8421	42.3158	208.158	32.1579	6.42105	7.52632	372.684	80.4211	9.31579	245.368	154	152.474	5.10526	32.2105	10.3684	8.89474	41.2579	49.3789	29.114	2.93007	32.0441	54.1005	5.55689	65.1671	Slovenia
Spain	EUROPE	278.789	45.1579	11.5263	91.9474	298.105	199.105	6.57895	1.89474	90.5789	10.3684	81.8947	72.6842	424.737	131.158	19.6316	19.6316	268.158	4.21053	20.8421	239.368	206.053	204.842	15.1053	76.4737	26.5789	19.5263	40.8474	89.5211	18.5214	3.62631	22.1477	45.9638	5.42936	67.1529	Spain
Sweden	EUROPE	287.211	51.6316	15	101.895	202.105	150.632	9.68421	1.36842	40.1579	27.7895	118.263	102	217.474	54.0526	4.47368	4.47368	274.842	4	14.1579	216.105	160.263	160.263	7.63158	43.3684	3.05263	8.78947	34.9316	52.2211	20.5478	2.95297	23.5008	50.4111	4.21611	61.6662	Sweden
Switzerland	EUROPE	267.895	54.4211	22.6316	47.5263	279.895	154	7.42105	7.52632	110.684	18.8947	150	124.789	262.842	64.5789	4.05263	4.47368	294.474	9.21053	13.5789	253.158	122.684	122.368	6.63158	47.7368	14.6316	22.8421	34.8526	59.6474	18.255	2.15319	20.4082	48.8633	5.21185	60.7507	Switzerland
Ukraine	EUROPE	101.684	33.4211	8.78947	10	125.789	94.2632	21.0526	0.105263	10.3158	3.10526	122.632	102.368	308.684	76.5263	6.78947	6.78947	429.579	27.0526	7.21053	339	367.632	367.632	1.78947	29.8421	27.3684	3.68421	47.3947	37.5368	33.4911	7.1724	40.6635	64.6644	3.7929	75.4454	Ukraine
United Kingdom	EUROPE	286.158	61	29.2632	84.3684	316	262.947	7.15789	1.05263	44.6842	7.10526	105.158	93	243.684	52.3158	12.5263	12.5263	294.684	8.89474	12.2632	258.211	307.105	307.105	10.3684	47.8947	5.84211	5.89474	43.6158	62.1211	20.7301	5.29574	26.0258	51.006	5.39518	64.3921	United Kingdom
Afghanistan	NORTH AFRICA & ASIA & OCEANIA	68.6316	3	27.2632	3.36842	0.0526316	0.0526316	0	0	0	0	14	12	85.3158	0.0526316	4.78947	4.78947	453	20.0526	47.1579	369.211	29.4737	29.5263	1.89474	7	1.10526	2.73684	41.3526	14.9632	64.4096	1.0308	65.4404	72.9002	0	86.8586	Afghanistan
Algeria	NORTH AFRICA & ASIA & OCEANIA	158.632	15.7895	17.5263	41.1053	9.05263	9.05263	0	0	0	8.42105	75.9474	69	266.526	66.8421	16.7368	16.7368	590.316	29.5789	4.89474	510.105	120.105	120.158	3.57895	39.2632	14	3.42105	60.3368	48.4789	47.6467	2.61333	50.26	68.6334	0.143606	89.4109	Algeria
Australia	NORTH AFRICA & ASIA & OCEANIA	260.895	56.4737	25.7368	65.1579	304.211	242.263	3.89474	1.57895	56.4737	10.5789	126.947	100.263	258.263	66.2632	4.68421	4.68421	238.895	13.1053	25.0526	193.421	157.158	153.158	13.4737	54.6842	5.36842	16.3158	35.3316	64.6263	18.7144	2.61597	21.3304	47.7762	4.43305	63.3203	Australia
Bangladesh	NORTH AFRICA & ASIA & OCEANIA	42	0.789474	0.210526	0.789474	0	0	0	0	0	0	21.5263	9.78947	45	2.26316	12.8947	14.0526	509.368	0.526316	453.053	54.6316	67.4211	60.2632	2.52632	15.1053	0	1.36842	42.3316	21.3789	72.1158	1.94127	74.0571	80.9043	0	96.4781	Bangladesh
Brunei	NORTH AFRICA & ASIA & OCEANIA	239.632	27.1053	8.26316	62.6316	12.4737	12.1579	0.526316	0.0526316	0.157895	11.0526	113.211	68.8421	207.579	6.21053	1.84211	6.57895	389.684	52.9474	200.421	112.684	52.0526	28.7368	22.6842	23.6316	2.42105	8.78947	40.6316	41.9316	40.9388	1.32635	42.2651	63.7659	0.23623	79.4716	Brunei
Cambodia	NORTH AFRICA & ASIA & OCEANIA	70.4211	0.526316	0	12.3158	22.8421	17.6316	5.05263	0	0	0.105263	34.3158	30.3684	97.1579	0	6.05263	9.63158	471.421	22.2105	442.789	6.21053	56.5789	0	12	6.21053	0	0.842105	39.6842	16.9105	64.7988	2.39124	67.1901	77.3543	0.922023	90.2026	Cambodia
Egypt	NORTH AFRICA & ASIA & OCEANIA	261.684	18.5263	39.5263	75.7368	5.21053	5	0	0	0.0526316	0.210526	78.6842	69.3684	527.211	250.368	21.7368	22.5789	679.211	163.947	109.526	393.579	76.8421	65	19.1053	15.7895	5.31579	1.42105	76.2632	38.7211	53.185	1.60505	54.79	73.2889	0.0746884	92.0737	Egypt
Fiji	NORTH AFRICA & ASIA & OCEANIA	86.5263	7.21053	2.57895	13.8421	67.5789	63.1053	1.84211	0	3.42105	0.947368	90.9474	82.9474	109.316	14.3684	22.3684	22.8947	384.737	1.73684	127.053	252.316	251.632	62.4737	171.684	29.4211	0	0	42.6789	54.2	35.6878	6.54327	42.2311	59.9176	1.20988	80.2105	Fiji
China	NORTH AFRICA & ASIA & OCEANIA	136.211	32.2632	6.15789	22.7368	79.0526	57.8421	14.4737	4.31579	2.47368	0	19	16.2632	661.842	48.3684	3.63158	15.3158	431.842	18.4737	210.158	194.263	190.895	82.7895	19.2632	19.2105	0.578947	3.36842	55.2842	33.1526	45.4326	5.38421	50.8168	63.4374	2.64851	78.1944	China
India	NORTH AFRICA & ASIA & OCEANIA	109.316	3.42105	2.63158	6.94737	4.26316	1	3.36842	0	0	0	59.5789	43.5263	172.158	18.8421	33.0526	33.0526	423.789	16.3158	198.368	164.158	67.1053	47.8421	17.3158	21.8947	1.36842	2.78947	46.1421	33.8368	52.2123	1.86926	54.0816	72.5897	0.437181	91.4357	India
Indonesia	NORTH AFRICA & ASIA & OCEANIA	131.158	1.21053	0.157895	16.3158	2.10526	1.89474	0	0	0	2.21053	42.3158	36.1053	95.9474	7.15789	4.84211	7.84211	492.105	84.9474	355.895	51.2632	152.211	11.1579	74.1579	20.2632	0	2.15789	41.5368	39.0158	57.2689	5.82424	63.0932	74.1867	0.0482251	94.3199	Indonesia
Iran	NORTH AFRICA & ASIA & OCEANIA	420.526	71.1053	67.9474	94.4211	0	0	0	0	0	0.157895	75.2105	68	481.789	133.053	20.3158	20.3158	540.579	4.10526	86.7368	448.263	131.579	131.526	2.57895	27.6316	5.78947	19.2105	62.3579	44.8053	45.8858	2.94577	48.8315	69.2321	0	89.7597	Iran
Iraq	NORTH AFRICA & ASIA & OCEANIA	115.421	10.8947	27.0526	27.5789	5.94737	5.57895	0.157895	0	0	0	50.7895	44.2105	370.526	114.158	10.6842	10.6842	429.895	3.63158	88.6316	316.789	49.6316	49.5789	2.42105	43.7895	7.21053	0.473684	46	51.8368	50.1043	1.47374	51.5781	67.4327	0.144479	94.9111	Iraq
Israel	NORTH AFRICA & ASIA & OCEANIA	392.684	50.5263	40.7895	67.3158	49.1579	40.0526	5	1	3.42105	12.2105	106.263	93.2105	580.842	153.737	20.5263	20.5263	406.474	53.7368	27.6316	319.579	118	115.579	26.4737	68.1053	5.26316	14.6316	55.4158	91.5579	27.3154	2.01795	29.3333	51.941	1.05271	78.0596	Israel
Japan	NORTH AFRICA & ASIA & OCEANIA	146.158	39.8947	6.10526	33.9474	152.368	106.316	23.8421	16.7368	5.52632	9.36842	80.7895	46.8947	297.684	23.4211	5.47368	27.3684	297.421	39.6316	129.789	123.684	92	63.4211	26.4211	41.5263	0.263158	4.31579	41.0316	52.7947	34.4299	2.24089	36.6707	59.0428	4.94819	74.3579	Japan
Jordan	NORTH AFRICA & ASIA & OCEANIA	158.211	25.5263	15.5263	48	4.57895	3.68421	0.421053	0	0.210526	5.15789	117.474	104.632	291.632	75.8947	19.3684	19.3684	441.368	3.73684	61.4211	374.632	63.2105	62.7368	21.0526	47.7895	4.52632	4.42105	50.9421	62.9421	39.8539	1.45535	41.3092	62.9109	0.11195	87.7343	Jordan
Kazakhstan	NORTH AFRICA & ASIA & OCEANIA	60.2632	27.2632	4.36842	5.31579	68.4737	51.4211	12.1053	0	4.89474	1.36842	71.3684	64.0526	327.789	76.0526	1.15789	1.15789	464.105	2.31579	23.6316	400.789	244.579	244.579	1.78947	31.2105	21.3684	1.42105	46.7789	40.2211	37.7755	4.92177	42.6972	60.4955	2.16576	72.8285	Kazakhstan
Kuwait	NORTH AFRICA & ASIA & OCEANIA	218	26.2632	14.2105	55.4211	0.368421	0.368421	0	0	0	5	109.526	94.6842	516.684	147.263	20.2105	20.2105	408.737	9.10526	146.895	250.211	71.7368	71.5789	13.9474	45.2632	3.36842	7.21053	49.8105	61.8632	33.838	1.25471	35.0927	57.7488	0.00624434	77.3112	Kuwait
Kyrgyzstan	NORTH AFRICA & ASIA & OCEANIA	68.5789	43.0526	5.47368	2.47368	28.0526	15.9474	9.42105	0.736842	1.84211	0.526316	52.5789	46.6316	312.368	68.9474	7.05263	7.05263	464.316	40	11.3684	410.105	278.211	278.211	0	12.8421	6.05263	3.78947	48.7789	20.9474	43.3881	6.36107	49.7491	67.1206	1.44933	76.314	Kyrgyzstan
Laos	NORTH AFRICA & ASIA & OCEANIA	125.789	0.473684	0	26.8421	38.1579	24.2632	13.4737	0	0.157895	6.78947	12.9474	10.0526	238.421	0	7.52632	9.21053	483.579	36.8421	441.684	4.68421	95.1053	14	6.73684	3.73684	0	0	45.8211	16.5579	62.4207	3.78722	66.2079	77.2613	2.41801	89.9388	Laos
Lebanon	NORTH AFRICA & ASIA & OCEANIA	437.053	46.8947	49.5263	72.0526	35.7368	18.6842	3.84211	0.105263	12.7368	15.1579	111.684	95.4737	668.579	211.737	28.7368	29.1579	359.526	0.210526	28.1579	329.316	201	199.474	33.8947	45.1579	5.57895	39.2632	54.2737	71.4579	29.0086	4.24318	33.2518	59.2376	0.879199	83.4526	Lebanon
Libya	NORTH AFRICA & ASIA & OCEANIA	174.211	18.6842	17.3684	29.9474	0.157895	0.105263	0	0	0	1.89474	102.684	90.8421	554.737	240.579	10.9474	12	557.263	2.94737	42.6316	474.684	94.9474	95.0526	31	54.3158	7.73684	15	52.8263	69.8737	40.6923	2.01636	42.7087	63.4899	0.00163972	87.5709	Libya
Malaysia	NORTH AFRICA & ASIA & OCEANIA	140.474	8.10526	4	14.8421	12.0526	11.5789	0.0526316	0	0.105263	1.47368	116.632	104.737	115.053	6.05263	7.84211	7.89474	400.368	17.6842	224.895	127.947	35	17.0526	36.3684	40.7895	0	4	34.3105	53.3579	39.2163	0.96206	40.1783	62.206	0.188637	80.9791	Malaysia
Maldives	NORTH AFRICA & ASIA & OCEANIA	223.947	15.9474	3.05263	47.7895	17.5263	14.3684	3.63158	0	2.78947	8.57895	98.5263	89.7368	168	28.5789	6.42105	6.42105	331.895	1.10526	139.895	191.316	73.1579	32.2632	29.6316	12.3158	0.0526316	27.6316	31.6158	32.2526	35.632	2.16456	37.7966	63.768	0.793247	76.928	Maldives
Mongolia	NORTH AFRICA & ASIA & OCEANIA	42.6842	13.0526	0.894737	16.7368	37.1053	25.4211	10.1579	0	1.26316	1.57895	33.3684	28.5789	69.1053	1.78947	1	1	349.579	0.0526316	14.8947	330.526	84.1053	81.5789	0	10.1053	1.26316	2.05263	27.6211	17.4263	38.4751	2.45419	40.9293	53.848	1.91971	60.254	Mongolia
Morocco	NORTH AFRICA & ASIA & OCEANIA	180.789	31.3684	23.2632	61.6842	11.6842	9.10526	0	0	2.42105	2.15789	101.211	92.5789	319.737	71.2105	18.1579	18.1579	693.526	83.3684	2.42105	484.947	99.4737	97.3684	7.05263	30.3684	4.63158	6.73684	68.8684	45.0579	51.0425	2.02013	53.0626	71.5913	0.201842	92.2917	Morocco
Myanmar	NORTH AFRICA & ASIA & OCEANIA	80.9474	0.473684	0	19.88	2.36842	1.36842	1.10526	0	0	0.684211	34.4737	2.63158	181.316	0	25.9474	26.5789	372	6.52632	350.053	10.6316	28.8421	16.2105	26.0526	19.4211	2.26316	3.42105	41.5737	33.1789	52.7316	1.05716	53.7888	68.1085	0.171927	89.9051	Myanmar
Nepal	NORTH AFRICA & ASIA & OCEANIA	113.158	5.15789	0.0526316	15.1053	2.94737	2.78947	0.368421	0	0	0	12.6842	11	200.316	0.0526316	22.8947	22.8947	507.158	120.474	241.105	113.474	144.158	131.789	0.473684	18.5263	0.105263	3.63158	50.2211	29.6211	59.2489	3.76296	63.0119	74.0569	0	92.8894	Nepal
New Zealand	NORTH AFRICA & ASIA & OCEANIA	306	74.3158	29.1579	49.7368	257.316	224.105	8.26316	0.526316	24.4737	9.21053	154.632	129.105	389.579	66.8947	11.4211	12.3684	263.684	7.47368	21.5263	215.526	189.053	175.842	14.9474	23	2.31579	6.89474	37.9632	34.1842	21.4572	3.20743	24.6646	54.9751	3.85878	63.9564	New Zealand
Oman	NORTH AFRICA & ASIA & OCEANIA	477.9	22.2	6.2	81.8	11.1	11.1	0	0	0	4.2	80.2	64.4	342.3	63.8	7	14.3	318.7	30.6	126.8	154.8	47.1	46.2	12	28.7	5.5	2.4	37.5	38.9	32.45	1.05	32.46	63.1	0.2	79.4	Oman
Pakistan	NORTH AFRICA & ASIA & OCEANIA	95.7368	8.15789	1.94737	31.7895	0.368421	0	0	0	0	0	77.7895	62.3684	84.5789	7.21053	18.2632	18.4211	395.421	25	38	326.421	35.0526	26.7368	3.10526	30.3158	1.52632	1.94737	38.1684	36.3684	42.3759	0.956135	43.332	64.327	0	81.0038	Pakistan
Philippines	NORTH AFRICA & ASIA & OCEANIA	278.737	2.26316	1	3.05263	40.6842	27.8421	12.0526	0	0	4.42105	73.3684	61.8947	173.579	7.26316	4.31579	4.78947	403.526	38.4211	296.737	67	85.4211	5.31579	12.8421	12.9474	0	4.36842	33	20.6526	49.5197	3.20204	52.7218	73.274	1.97481	83.6661	Philippines
Saudi Arabia	NORTH AFRICA & ASIA & OCEANIA	254.053	18.7895	20.5263	38.2632	0.578947	0.578947	0	0	0	3.36842	84.2105	76.0526	290.684	77.5789	11.3684	11.3684	443	69	90.6316	244.211	46.3684	45.0526	5.47368	41.1579	2.36842	3.10526	50.5211	56.0684	41.3805	1.00229	42.3828	64.1829	0.00882924	86.1557	Saudi Arabia
Solomon Islands	NORTH AFRICA & ASIA & OCEANIA	124.211	0	0	3.52632	19	18.1053	0.210526	0	0.157895	1.52632	24.3158	21.7895	44.8947	0	22.1579	22.1579	232.316	0.0526316	170.579	62.0526	912.316	0.421053	211.105	7.26316	0	0	36.4895	35.0421	29.1384	32.3747	61.513	72.9102	0.384047	91.3876	Solomon Islands
South Korea	NORTH AFRICA & ASIA & OCEANIA	186.842	25.3684	21.1579	58.3684	190.105	100.316	14.1579	74.8947	0.736842	4.47368	95.5263	46.7895	596.737	19.7895	5.26316	25.7895	426	41.5263	235.684	139.421	45.6842	31.8421	28.1053	37.1579	0.263158	7.15789	50.2474	49.8368	41.7979	0.996445	42.7943	65.2306	4.17133	80.8013	South Korea
Sri Lanka	NORTH AFRICA & ASIA & OCEANIA	100.684	2.05263	1.26316	1.73684	6.15789	5.52632	1	0	0	1.21053	75.1053	68.1053	91.5263	6.26316	20.2105	20.2105	398.368	8.94737	264.368	123.211	47.4211	16.8947	179.895	7.31579	0.0526316	2.05263	39.9421	36.5842	48.8972	2.46991	51.3671	73.8981	0.195734	93.6285	Sri Lanka
Syria	NORTH AFRICA & ASIA & OCEANIA	256.211	38.4737	50.1053	62.6842	2.89474	2.15789	0.842105	0	0	3.21053	115.421	104.316	273.737	77.7368	16.3158	19.5789	474	12.0526	27.6842	434.105	61.0526	61.1053	22.5789	51.6842	6.68421	20.6842	54.9684	69.8579	38.0865	1.3722	39.4587	60.5214	0.114637	86.9071	Syria
Tajikistan	NORTH AFRICA & ASIA & OCEANIA	56.6316	11	27.7368	0.210526	5.42105	1.52632	1.78947	0	2.05263	0	40.0526	36.1053	267.684	69.8947	1.84211	1.84211	436.684	20.0526	14.4737	385.053	87.5789	87.5789	0.210526	25	4.52632	2.52632	40.2526	40.1737	51.0865	2.6001	53.6866	66.7499	0.377923	90.8301	Tajikistan
Thailand	NORTH AFRICA & ASIA & OCEANIA	302.158	1.42105	2.89474	42.1579	85.5789	56.2105	28.0526	1.05263	0	0.578947	87.8947	78.8947	131.368	7.21053	8.36842	14.2105	363.842	20.6316	318.158	24.8947	53.7368	11	55.6842	17.5789	0.421053	2.36842	34.7053	32.7632	44.3931	1.94472	46.3378	72.1966	4.24264	83.5889	Thailand
Timor-Leste	NORTH AFRICA & ASIA & OCEANIA	46.9474	0.0526316	0	2.68421	8.21053	7.68421	0	0	0.368421	2.52632	17.1579	12.8947	73.1579	1.10526	18.4211	20.8421	408.211	223.105	160.737	24.4211	297.526	2.57895	12.9474	6.94737	0	0	36.7263	20.7737	50.8526	12.9165	63.769	72.34	0.222128	87.6164	Timor-Leste
Tunisia	NORTH AFRICA & ASIA & OCEANIA	232.263	25.0526	20.8947	34.3158	23.1579	17.9474	0	0.0526316	5.10526	3.52632	88.8947	79.2632	513.684	203.737	21	21.6316	577.421	0	4.05263	552.895	80.9474	81.0526	11.8947	53.3158	1.57895	13.4737	66.8368	68.9421	43.6267	1.59113	45.2179	64.3402	0.391453	89.489	Tunisia
Turkey	NORTH AFRICA & ASIA & OCEANIA	318.895	84.2105	85.3684	57.1053	35.5263	31.2105	3.26316	0	1.05263	1.31579	84.3158	74.6842	652.789	232.684	34.9474	36.5263	630.368	45.1579	23.3158	554.632	163.421	163.421	20.8421	56.1053	18.5789	16.7895	76.8263	76.1421	40.451	2.82244	43.2735	63.2653	0.654029	87.8983	Turkey
Turkmenistan	NORTH AFRICA & ASIA & OCEANIA	125.316	20.2632	72.6842	2.57895	25	3.31579	0.368421	0	21	0	31.9474	26.4737	327.842	122.632	0	0	556.632	0	29.2632	526.421	66.1053	66.0526	0	23.1053	2.31579	1	51.5895	30.8158	50.3968	1.45565	51.8524	63.7686	0.641674	78.1403	Turkmenistan
United Arab Emirates	NORTH AFRICA & ASIA & OCEANIA	308.474	42.2105	23.1579	53.4211	0	0	0	0	0	5.89474	99.7895	90.1053	494.158	146.789	42.5789	42.5789	409.632	1.84211	125.684	279.632	49.0526	46	24.3684	27	2.94737	20.7368	56.0842	46.8947	34.0551	0.889823	34.9449	60.5104	0	77.9954	United Arab Emirates
Uzbekistan	NORTH AFRICA & ASIA & OCEANIA	84.5789	1.68421	41.0526	0.105263	21.8947	12.1053	5.42105	0	4.36842	0	32.5263	29.6316	395.211	137.368	0	0	501.579	16.5789	21.5789	452.368	94.6842	94.6842	1.68421	31.8947	1.73684	2.73684	48.3684	39.1316	48.6194	2.23733	50.8567	63.8495	0.996024	81.538	Uzbekistan
Viet Nam	NORTH AFRICA & ASIA & OCEANIA	147.105	1.78947	0.947368	15.4211	27.2632	21.1579	5.94737	0	0	0	29.4737	26.8421	200.789	0	7.26316	10.7895	441.632	23.1053	398.211	20.3158	47.3684	10.8947	12.3158	7.47368	0	8.73684	41.1158	18.5789	58.0344	1.71254	59.747	71.4155	1.02858	84.0119	Viet Nam
Yemen	NORTH AFRICA & ASIA & OCEANIA	106.316	5.15789	19.2105	17.8947	2.15789	2.10526	0	0	0	1.31579	67.6842	59.9474	91.6842	38	16	18	442.158	25.6316	34.4737	317.789	29.6842	29.6842	4.21053	20.5263	0.0526316	0.368421	45.3368	32.3421	52.5016	0.945277	53.4469	71.0655	0.0527267	92.7262	Yemen
Angola	SUBSAHARAN AFRICA	128.579	0.842105	0	0	88.3684	57.4211	2.89474	18.5263	9.94737	1.10526	33.8947	26.2632	81.5789	9.78947	21.1053	21.1053	202.105	98.6842	15.6316	74.7895	623.316	23.7368	3.52632	22.6842	1.31579	0	29.9684	30.3368	25.9774	30.8391	56.8164	71.9769	2.39377	88.9897	Angola
Benin	SUBSAHARAN AFRICA	84.4737	2.57895	0.473684	5.42105	32.2105	18.8421	1.10526	11	1.57895	0	14.0526	12.6842	127.789	57.7895	29.2632	29.2632	301.368	149.789	81.6316	20.3684	741.421	0.315789	23.4737	17.7895	0	4.57895	46.9421	39.7474	33.3878	30.5651	63.9529	73.2577	0.707264	95.107	Benin
Botswana	SUBSAHARAN AFRICA	126.368	11.5263	2.15789	24.2105	161.263	79.6842	3.42105	69.8421	8.57895	2.57895	73.6316	58.4211	86.5789	11.4737	25.7368	28.2105	306.737	104.947	25.2105	94.8421	151.211	32.8947	3.47368	20.8421	13.3158	1.68421	39.4895	33.2368	36.6574	5.47933	42.1367	66.2108	3.64393	80.9357	Botswana
Burkina Faso	SUBSAHARAN AFRICA	17.8421	0	0	0.157895	583.579	12.3158	0.842105	569.789	0.526316	0.263158	13.5263	12.2632	69.8947	3.68421	35.1579	36.6316	549.053	117	53.4211	17.9474	20.0526	0.526316	33.1053	13.5263	0	3.36842	62.3579	43.7158	52.281	0.731298	53.0123	68.0703	7.54953	86.1499	Burkina Faso
Cabo Verde	SUBSAHARAN AFRICA	156.684	12.7368	1.73684	17.7368	87.5263	62.6316	1.78947	0.157895	25.0526	4.84211	60.1579	50.1053	131.526	42.1053	23.8421	23.8947	341.789	124.842	113.526	101.053	114.211	65.5789	18.4737	26.3684	0.0526316	0	38.8263	38.0053	38.7444	3.35888	42.1033	62.0228	2.02923	77.5419	Cabo Verde
Cameroon	SUBSAHARAN AFRICA	263.842	0.210526	0.210526	0	147.474	59.6316	0	87.2105	1	1.31579	23.6842	21.0526	206.684	52.1579	38.7895	39.9474	270.053	106.105	42.3684	40.7368	394.263	11	20.7895	21.6842	0	6.15789	45.6895	39.0737	31.1303	17.0251	48.1554	70.8193	2.76699	91.379	Cameroon
Central African Republic	SUBSAHARAN AFRICA	135.263	0	0	14.3158	56	14	0	41.3158	0.263158	2.94737	23.6316	12.7895	60.3158	0.526316	17.6842	17.6842	140.842	73.1579	13.2105	21.6842	707.737	0.368421	27.7368	30.6316	0	0	29.6211	47.7947	17.9771	31.6441	49.6212	62.1173	1.17031	87.4132	Central African Republic
Congo	SUBSAHARAN AFRICA	167.842	0.157895	0	7.68421	65	60.4211	1.21053	0	3.26316	0.263158	32.4737	29.6842	98.3684	14.6842	8.42105	8.42105	154.211	12.1579	38.5789	102.158	770.684	3.10526	16.2632	30	0.263158	0	27.6842	41.5789	19.2141	36.8056	56.0197	70.7098	0	92.7909	Congo
Côte d'Ivoire	SUBSAHARAN AFRICA	237.105	0.842105	0	4.21053	111.263	42.2632	0	65.2105	3.68421	4.05263	26.2632	23.2632	119.526	8.84211	4.47368	4.63158	280.053	64.8947	157.842	46.3158	829.684	2.42105	12.3684	34.2632	0	11.5263	40.7632	47.6474	28.8596	29.8665	58.7261	74.1784	1.87292	93.9115	Côte d'Ivoire
Djibouti	SUBSAHARAN AFRICA	34	0.789474	0.315789	4.73684	12.0526	8.21053	3.52632	0	1.05263	1.31579	76.5263	69.8421	124.316	12.2632	12.4737	12.4737	370.263	4.89474	115.579	232.421	12.6316	11.5263	2.73684	26.7368	1	0	36.0474	34.6632	48.6657	0.372804	49.0385	68.3711	0.713794	88.0796	Djibouti
Ethiopia	SUBSAHARAN AFRICA	15.2632	0	0	1.31579	16.8421	7.21053	0	9.31579	0	2.36842	12.8947	10.3684	36.9474	1.52632	36.7368	36.7895	369.579	109.263	1.42105	81.6316	175.263	13.5789	1.15789	4.47368	0	2.63158	46.2263	13.0842	56.7023	12.4005	69.1028	78.5341	0.431493	93.9821	Ethiopia
Gabon	SUBSAHARAN AFRICA	431.789	3.68421	0.263158	6.36842	214	188.684	5.78947	0	19.5789	1.10526	44.7368	40.1053	117.421	25.7895	0.736842	0.736842	280.737	35.6842	98.8421	142.421	470.895	6.26316	24.1579	16.3158	0.684211	0	39.2053	34.5	27.5042	16.1489	43.6531	69.7596	4.18065	81.5503	Gabon
Gambia	SUBSAHARAN AFRICA	16.5263	0.0526316	0	1.26316	84.6842	4.10526	0	80.7895	0.263158	0.421053	84.6842	76.1053	89.8947	50.8947	7.42105	7.42105	446	27.6842	157.789	78.1053	29.5789	10	19.2105	47.1053	0.105263	0.263158	43.8316	65.3632	47.5184	1.04158	48.5599	64.7133	1.0914	92.8965	Gambia
Ghana	SUBSAHARAN AFRICA	359.105	0.842105	0	43.3684	61.4737	13.6842	0.157895	46.8947	0.947368	0	21.7895	19.6842	89.8947	39.3684	2.05263	2.10526	202.684	60.2105	56.5263	38.5789	1106.05	0.368421	34.6842	19.5263	0	2.05263	37.6421	35.7737	20.1938	41.0235	61.2173	77.5329	0.875614	94.4369	Ghana
Guinea	SUBSAHARAN AFRICA	284.211	0	0	0.0526316	4.21053	3.84211	0.421053	0	0	3.31579	32.4211	29.0526	169.105	6.52632	15.1579	15.1579	341.474	25.7895	247.316	35.2632	309.263	1.42105	13.1053	36.4211	0	0	44.3105	49.5526	41.9106	12.8404	54.751	71.2821	0.11754	96.3998	Guinea
Guinea-Bissau	SUBSAHARAN AFRICA	142.737	0	0	13.1579	66.0526	11.7895	2.31579	44.9474	7.21053	0	21.3158	18.3684	49.6842	2.36842	5.36842	5.36842	386.158	36.4211	257.684	23.5263	191.526	1.21053	10.2632	32.3684	0	5.36842	35.1947	43.5526	51.5724	8.56991	60.1423	70.2879	1.4672	91.6827	Guinea-Bissau
Chad	SUBSAHARAN AFRICA	29.5789	0	0	0	9.21053	5.10526	0	3.84211	0.0526316	0	21.2105	19.4211	28.7895	0	23.7368	23.7368	357.421	31.1579	23.3684	19.5263	171.737	7.26316	58.7368	12.0526	0	0	49.2632	47.3	43.7859	8.38721	52.1731	62.3165	0.182057	92.8944	Chad
Kenya	SUBSAHARAN AFRICA	154.632	0.315789	0	3.84211	38.6316	22.0526	2.15789	14.2105	0	0.0526316	49.4211	43.3684	130.737	24.6316	44	44.3684	323	231.526	14.9474	68.3158	185.053	96.5789	3.63158	18.8947	0.210526	1.10526	42.8	31.4	39.0154	7.07462	46.0901	68.0467	1.03088	86.3859	Kenya
Lesotho	SUBSAHARAN AFRICA	50.8947	7.94737	1.52632	4	67.0526	32.5789	2.10526	32.7895	0.368421	0.105263	45.2105	38.8947	61.7895	6.21053	18.3158	18.3158	622.526	422.684	13.7895	125.789	124.579	124.579	0	5.68421	0	0	59.8474	24.2895	62.1312	2.98817	65.1194	76.4205	1.28889	93.1556	Lesotho
Liberia	SUBSAHARAN AFRICA	144.895	0.0526316	0	7.73684	22.0526	8.47368	13.5263	0	0	2.94737	15.1053	13.5789	95.0526	3.21053	7.73684	10.1053	255.684	8.63158	171.368	75.0526	428.684	0.894737	11.2105	45.6316	0	2.63158	30.7632	52.6684	36.655	20.7084	57.3633	69.0712	2.05874	94.6725	Liberia
Madagascar	SUBSAHARAN AFRICA	130.895	1	0	12.7368	12.9474	9.73684	2.10526	0	1	6.73684	21	17.1579	53.6316	4.26316	12.8947	12.8947	326.105	38.2105	269.474	18.0526	440.842	26.2632	6	7.89474	0	0.789474	35.4316	15.9947	49.7572	18.7083	68.4655	78.3465	0.538247	90.9042	Madagascar
Malawi	SUBSAHARAN AFRICA	158.474	0.0526316	0	0.0526316	42.2632	4.52632	1	36.8421	0	0.157895	35.5789	32.5789	60.8947	7.52632	38.2632	40.0526	410.526	369.737	11.4737	18.4737	421	242.579	10.5263	7.52632	0.842105	0.368421	51.9	26.4474	48.1778	12.1956	60.3735	76.5008	0.833597	96.1212	Malawi
Mali	SUBSAHARAN AFRICA	75.1579	0	0	4.42105	16.8421	1.36842	0	15.3158	0	0.0526316	34.4737	31.3158	151.263	11.8421	28.0526	28.6842	535.526	76.3158	134	21.0526	58.2632	18.3684	5.52632	23.6842	0	2.73684	51.9579	39.5316	54.9122	1.85011	56.7624	68.6097	0.21918	88.493	Mali
Mauritania	SUBSAHARAN AFRICA	30.1579	1.21053	0	1.15789	0	0	0	0	0	0	91.7895	83.7368	41.7895	10.5789	32.6316	32.6316	439.053	9.52632	109.632	251.474	18.7895	14.4211	2.84211	32.7895	0.0526316	0.0526316	46.3895	40.8526	44.2416	0.495225	44.7369	64.9353	0	82.5554	Mauritania
Mauritius	SUBSAHARAN AFRICA	109.474	19.5263	7.47368	14.7895	87.2632	79.6316	3.52632	0	3.94737	1.89474	102.737	92.5789	205.421	35.3684	27.0526	27.9474	436.789	6.63158	152.947	273.842	51.8421	50.4211	11.2105	49.2105	8.78947	0.736842	46.2263	60.3053	40.1438	1.15354	41.2973	63.2091	1.61982	83.8285	Mauritius
Mozambique	SUBSAHARAN AFRICA	54.2105	0	0	4.63158	14.5789	9.89474	2.05263	1.47368	1	0	21.7895	20.0526	29.6316	7	25.9474	26.3158	266	152.105	36	44.7895	667.842	13.3684	6.21053	20.1579	1.26316	4.94737	34.5947	30.0684	32.585	33.7154	66.3004	75.4547	0.560181	94.7379	Mozambique
Namibia	SUBSAHARAN AFRICA	73.8947	9.31579	3.15789	13.2105	116.579	103.579	1.47368	7.52632	3.89474	3.42105	64.1579	57.0526	61.6316	12.1579	19.6842	19.6842	325.632	122.842	6.42105	95.8421	341.632	25.3684	2.15789	12.0526	8.10526	0.263158	38.7526	24.0158	36.8583	12.9457	49.804	69.398	2.86762	82.3389	Namibia
Niger	SUBSAHARAN AFRICA	42.1053	0	0	0.0526316	1.36842	1.05263	0	0	0	0	15.5789	14.4211	129.737	19.8947	64	64	559.895	9.63158	36.3158	14.0526	43.1053	2.68421	15.9474	11.3684	0	1.36842	53.6105	32.8263	54.6874	1.79238	56.4798	69.3896	0.0408395	90.2961	Niger
Nigeria	SUBSAHARAN AFRICA	179.263	0	0	0.105263	181.895	23.6316	0	158	0	0	24.2632	21.1053	171.684	24.2632	25.6316	32	379.263	71.2105	61.7368	46	634.158	6.47368	18.1053	38.1579	0	10.7895	51.3947	56.7947	36.3641	19.7086	56.0727	69.8032	2.90147	93.6766	Nigeria
Rwanda	SUBSAHARAN AFRICA	440.895	0	0	0.315789	144.105	19.4211	0	124.895	0	0	7.63158	7.10526	95.6842	8.84211	75.2105	81.7368	101.526	37.6316	11.0526	13.7368	699.211	200.474	7.63158	7.21053	0	0	41.0316	15.9895	13.9837	31.173	45.1567	80.8634	5.20087	91.4708	Rwanda
Senegal	SUBSAHARAN AFRICA	40.2632	1	0	9	9.05263	7.31579	0	0	1.63158	0.631579	41.0526	35.8947	136.053	19.2632	10.8947	11.1053	432.211	46.0526	183.947	75.8421	46.5263	10.9474	14.0526	41.6842	0.0526316	2.21053	41.4632	55.9737	50.4243	1.94366	52.3679	63.3397	0.206568	91.9251	Senegal
Sierra Leone	SUBSAHARAN AFRICA	101.211	0	0	0.105263	123.632	5.31579	0	118.474	0	3.52632	14.4211	12.6316	132.632	14	30	30	323.368	8.52632	257.632	37	219.158	0.578947	16.5263	38.0526	0	3.10526	38.9632	50.0211	46.385	9.85545	56.2405	68.3677	2.44908	93.9316	Sierra Leone
South Africa	SUBSAHARAN AFRICA	102.421	14.2105	9.15789	26.7895	194	152.526	16.2105	1.47368	24	1.63158	88.2632	78.9474	117.474	25.8421	8.57895	10.7368	497.632	289.895	37.5789	162.421	81.1579	78.1579	5	35.2105	17.8947	0.789474	49.0368	48.4632	44.4335	1.81142	46.2449	65.8556	4.82105	81.6705	South Africa
Sudan	SUBSAHARAN AFRICA	112.842	0.0526316	0	5.78947	59.7368	0.684211	1	58.0526	0	1.26316	51	46.2105	160.947	40.8947	19.7895	19.7895	354.684	5.26316	3.36842	87.8421	29.7895	16.6316	10.4211	16.1579	1.26316	0	43.59	33.5	39.2883	1.02207	40.3104	84.4921	0.948591	76.4311	Sudan
Swaziland	SUBSAHARAN AFRICA	165.474	10.7368	1	33.9474	206.368	45.5263	2.10526	154.105	4.78947	2.10526	94.5789	72.9474	58.7368	11.3684	13.7895	14.6842	362.421	187.474	39.3684	104.526	145.421	33.0526	6	11.5789	4.21053	7.42105	41.0632	27.9684	41.9937	4.91149	46.9051	71.4546	3.92152	83.721	Swaziland
Tanzania	SUBSAHARAN AFRICA	155.211	0.210526	1	0	178.684	16.1579	0.368421	161.684	0	0.473684	23	18.9474	86.2632	10.2105	56.3158	56.3158	291.053	181.474	49.4211	29.4211	483	38.7368	21.7895	15.7368	2.94737	1.15789	44.2053	28.1	39.1786	15.618	54.7966	73.7017	2.91076	90.5589	Tanzania
Togo	SUBSAHARAN AFRICA	28.7368	0.368421	0	6.94737	33.5789	16.3684	0.526316	14.2105	2.26316	1.73684	15	13.6842	88.5789	12.7895	25.0526	25.0526	346.211	180.737	53.6842	29.0526	550.526	0.947368	17.0526	22.3158	0.105263	0.315789	44.3263	41.0579	39.1962	24.8168	64.013	71.8446	0.688068	95.7086	Togo
Uganda	SUBSAHARAN AFRICA	512.474	0	0	0.263158	357.105	12.8947	1	343.579	0	1.84211	22.6316	19.9474	60.7895	1.52632	51.9474	54	167.421	81.3684	11.3684	19	497.947	36.4211	21.9474	15.5789	4.47368	0	39.4263	29.5526	18.9786	20.8168	39.7955	75.1278	6.33105	86.686	Uganda
Zambia	SUBSAHARAN AFRICA	28.5789	0.684211	0	2.52632	89.3158	17.6842	1	70.5789	0	0.263158	33.2105	30.2632	69.2105	5.84211	5.42105	8.89474	387.211	336.737	5.68421	34.6316	250.526	3.89474	11.8421	10.2632	1.10526	0	40	27.0632	49.7544	13.5072	63.2616	73.6644	1.85312	92.5079	Zambia
Zimbabwe	SUBSAHARAN AFRICA	34.8947	2.42105	0	10.5263	72.5789	28.1053	11.8421	31.8947	0.842105	0.578947	68.9474	62.5263	33.7895	3.42105	11.5789	13.4211	408.842	309.632	6.52632	64.6842	45.8421	7.42105	13.5789	23.3158	3	0.105263	39.0579	40.2316	46.732	2.16186	48.8939	67.1575	2.86237	88.6871	Zimbabwe
	MEAN	204.877	24.2884	13.7974	38.9094	118.82	77.6032	7.66422	16.8704	16.7408	5.61153	80.1139	65.9136	224.763	50.0773	16.0127	17.1598	373.714	60.2326	79.6839	196.954	201.004	98.6602	16.539	29.2816	5.19237	5.23971	43.0355	42.7054	36.4078	6.19787	42.5991	64.114	2.6215	79.8345
NOTES:
* Data for 1993-1999 are for Belgium & Luxembourg
** Data for 1993-2005 are for Serbia & Montenegro
ᴬ Listed as "Beverages, alcoholic" in the FAOSTAT database.

## Sheet: 2-Animal-Total food consumption
	Mean annual consumption (supply) of animal foods or food combinations between 1993-2011 (per capita)
	Source: http://www.fao.org/faostat/en/#data/CL
		FISH & SEAFOOD	PELAGIC MARINE FISH	FRESHWATER FISH	MEAT TOTAL	BEEF MEAT	PORK	POULTRY	MUTTON & GOAT MEAT	MEAT FAT	MEAT PROTEIN	DAIRY TOTAL ᴬ	CHEESE	MILK ᴮ	DAIRY FAT	DAIRY PROTEIN	EGGS TOTAL	LARD	OFFALS	ANIMAL FAT	ANIMAL PROTEIN	ANIMAL FAT & ANIMAL PROTEIN	TOTAL FAT	TOTAL PROTEIN	TOTAL FAT & ANIMAL PROTEIN	TOTAL FAT & TOTAL PROTEIN	TOTAL ENERGY
		g/day	g/day	g/day	g/day	g/day	g/day	g/day	g/day	g/day	g/day	g/day	g/day	g/day	g/day	g/day	g/day	g/day	g/day	g/day	g/day	g/day	g/day	g/day	g/day	g/day	kcal/day
Argentina	AMERICA	23.2105	3.36842	0.894737	255.526	155.158	19.2105	72.4737	4.31579	38.4947	39.8526	550.842	28.3684	256.368	17.3316	15.7316	22.6316	6.73684	16.3158	66.7421	63.2947	130.037	110.732	99.1263	174.026	209.858	3136.95	Argentina
Bahamas	AMERICA	78.7895	24.5789	2.68421	274.053	57.6316	67.0526	135.947	13.1053	34.7947	34.8579	257.526	15.4211	131.263	9.54211	9.03158	12.0526	12.6316	8.36842	62.3895	54.4684	116.858	89.6526	83.4632	144.121	173.116	2616.37	Bahamas
Barbados	AMERICA	94.0526	57.4211	1.84211	202.632	37.5263	25.4211	122	16.5789	25.8579	26.1895	280	19.3684	122	10.0263	9.58947	13.1053	6.68421	8.94737	49.3211	49.5474	98.8684	95.1789	85.9684	144.726	181.147	2904.26	Barbados
Belize	AMERICA	30.1053	12	2	123.053	21.6316	30.3684	71.6316	0	17.1211	15.0526	224	8.15789	146.895	6.74737	7.47895	12.4737	21.5789	0	44.0158	28	72.0158	69.9158	70.6316	97.9158	140.547	2729.47	Belize
Bolivia	AMERICA	4.63158	1.21053	2	145.053	53.6842	26.7368	55.5263	6.68421	17.9684	17.3211	97.4737	2.57895	78.4737	2.48421	3.17368	13.4737	6.31579	11.7368	27.4	24.4526	51.8526	45.2842	57.4737	69.7368	102.758	2087.79	Bolivia
Brazil	AMERICA	18.5263	2.21053	6.15789	210.421	96.2632	32.6316	79.7368	2	26.4789	25.8895	324.842	1.05263	304.053	10.5474	10.4474	20.5263	6.42105	6.47368	45.4579	41.3789	86.8368	98.2368	81.7526	139.616	179.989	2990.21	Brazil
Canada	AMERICA	64.4211	13.3684	8.52632	264.053	89.5263	76.3684	95.4211	2.57895	25.2842	32.6	561.474	32.5263	133.947	14.0263	14.4474	30.5789	18.0526	3.89474	67.7789	58.2474	126.026	143.621	103.116	201.868	246.737	3417.05	Canada
Colombia	AMERICA	13.8947	7.31579	4.73684	106.842	47.4737	9.57895	47.4211	1.05263	14.3789	13.2842	327.211	3.42105	302.158	9.82632	11.7579	24.8947	3.63158	8.68421	30.9368	30.6105	61.5474	73.0895	63.1842	103.7	136.274	2592.21	Colombia
Costa Rica	AMERICA	20	2.68421	8.26316	121.579	46.1053	21.7895	53.4737	0	9.50526	14.6842	453.158	5.78947	389.158	13.9053	15.5158	27.3158	7.10526	6	34.5474	36.1053	70.6526	80.4421	71.7895	116.547	152.232	2795.89	Costa Rica
Cuba	AMERICA	26.7895	2.78947	7.63158	93.3158	17.6842	34.7368	33.8421	2	14.1895	11.3421	246.895	4.10526	150.316	5.35789	7.22632	18.9474	2.57895	5	24.8211	23.9105	48.7316	54.2895	70.5947	78.2	124.884	2946	Cuba
Dominican Republic	AMERICA	22.3684	10.1053	1.05263	118.579	25.6316	23.1579	69.1579	0.578947	12.9895	13.3158	176.632	1.84211	112.947	4.45263	5.83158	15.5789	3.57895	5.57895	23.5263	24.0947	47.6211	77.0789	50.2737	101.174	127.353	2283.74	Dominican Republic
Ecuador	AMERICA	19.3158	8.10526	1.84211	117.947	40.5263	29.6842	43.8947	2.05263	15.3	14.2474	410	9.89474	333.474	14.3263	13.2263	12.9474	9.57895	9.10526	41.7684	32.5947	74.3632	87.8316	58.8053	120.426	146.637	2328.79	Ecuador
El Salvador	AMERICA	12.1579	4.47368	1.89474	62.2105	20.8421	7.10526	34.5263	0	5.56316	7.72632	268.421	6.94737	205.684	8.67368	8.70526	22.1053	8.36842	3.26316	23.6053	20.5421	44.1474	57.0474	65.9211	77.5895	122.968	2510.68	El Salvador
Guatemala	AMERICA	4.63158	2.42105	1.47368	65.2105	14.8421	11.4211	37.5263	0.789474	5.68947	7.73684	122.263	3.42105	89.2105	4.14737	4.08947	31.5263	2	2.63158	14.8526	15.9474	30.8	49.8	59.5158	65.7474	109.316	2322.37	Guatemala
Guyana	AMERICA	111.632	6.15789	2.63158	93.2105	8.84211	4.63158	75.9474	3	11.7421	11.0421	298.158	3.73684	200.737	7.62632	10.3789	3.05263	1.68421	3.89474	23.4737	33.8579	57.3316	54.3053	75.1579	88.1632	129.463	2645.63	Guyana
Haiti	AMERICA	8.84211	4.10526	1.73684	36.1579	11.8421	10.7895	9.05263	1.89474	5.41053	4.69474	43.0526	0.0526316	37.1579	1.40526	1.48421	1	1.78947	4.10526	8.67895	8.01579	16.6947	38.8684	42.9211	46.8842	81.7895	1913.16	Haiti
Honduras	AMERICA	9.26316	3.68421	1.10526	76.9474	24.8421	9.26316	42.8421	0	8.98947	9.97368	290.947	5.52632	218.526	8.6	9.81579	15.9474	4.68421	3.78947	24.9842	22.9421	47.9263	67.5842	62.0053	90.5263	129.589	2472.21	Honduras
Chile	AMERICA	39.6316	21.7368	1.84211	182.421	58.6842	46.3158	74.6316	2.05263	29.8684	22.5474	295.105	10.3158	171.474	8.27895	9.52632	18.0526	6.10526	7.73684	48.0947	40.0263	88.1211	82.4211	81.4263	122.447	163.847	2863	Chile
Jamaica	AMERICA	66.1579	21.2105	5.26316	155.368	19.2105	9.89474	120.789	5.31579	15.7526	17.8737	278.947	3.89474	216.053	9.83158	9.85263	5.94737	6.31579	10.3684	34.5579	36.9895	71.5474	79.6	74.4579	116.589	154.058	2754.68	Jamaica
Mexico	AMERICA	29.2105	10.3684	3.52632	146.105	45.0526	33.1579	62.3684	2.89474	19.9842	17.7789	286.316	5.10526	209.895	8.31053	9.30526	40.4737	7.31579	13.7895	40.2105	36.9105	77.1211	86.4842	84.9316	123.395	171.416	3037.74	Mexico
Nicaragua	AMERICA	8.42105	4.94737	0.315789	50.5263	13.5263	4.57895	30.8947	0	6.14737	6.29474	182.105	6.15789	129.263	6.07368	6.28421	12.2632	2.36842	4.42105	16.1947	15.5053	31.7	51.2842	55.6158	66.7895	106.9	2238.21	Nicaragua
Panama	AMERICA	33.1579	16.6842	1.15789	151.789	54.3158	24.6842	69.7895	0	11.6368	18.4368	173.263	11.1053	133.737	8.27368	9.89474	12.4211	9.89474	10.3158	31.7789	35.8211	67.6	66.2053	66.6105	102.026	132.816	2352.74	Panama
Paraguay	AMERICA	9.63158	0.789474	8.89474	169.526	72.2105	76.7368	18.3158	1.84211	19.8368	21.9579	200.737	0.315789	195.632	6.94211	6.65263	39.5789	11.2632	15.4211	40.3421	36.5842	76.9263	87.6474	73.4526	124.232	161.1	2605	Paraguay
Peru	AMERICA	56.5789	32.4737	4.68421	50.3684	10.6316	8	26.1579	2.21053	4.96842	9.06842	143.053	1.26316	118.947	4.55263	4.56842	13.6842	1.42105	12.6316	18.9895	22.7632	41.7526	44.0789	64.9737	66.8421	109.053	2363.79	Peru
Suriname	AMERICA	38.8947	11.4211	1.15789	112.105	20.7895	14.3684	75.7895	0.157895	13.3526	12.7211	177.526	3	109.789	4.47895	6.34211	14.8421	1.21053	1.47368	21.8053	25.4421	47.2474	67.6789	58.8632	93.1211	126.542	2597.53	Suriname
Trinidad and Tobago	AMERICA	44	16.7895	0.684211	131.316	14.2632	14.8947	96.8421	5.15789	14.3684	15.3053	278.158	11.8421	130.474	7.99474	9.55789	8.89474	9.68421	4	34.0211	31.1947	65.2158	78.0842	67.4	109.279	145.484	2736.89	Trinidad and Tobago
United States of America	AMERICA	61.1579	7.57895	9.10526	332.632	115.263	81.2105	132.579	1.42105	29.9684	40.2579	702.842	40.0526	330.579	22.3895	22.5579	38.6316	9.10526	2.52632	69	72.6053	141.605	153.8	113.116	226.405	266.916	3700.16	United States of America
Uruguay	AMERICA	18.7368	3.94737	0.684211	207.684	113.105	26.5263	40.8421	24.8947	35.3263	25.2947	537.263	17.6316	335.158	15.1211	18.7474	27.6842	4.73684	6	60.3632	49.6789	110.042	88.9789	86.7	138.658	175.679	2835.05	Uruguay
Venezuela	AMERICA	46.2105	22.2632	4.36842	175.158	49.3684	16.6316	82.3158	1	13.5895	22.3632	268.105	14.5789	136.421	7.9	7.22632	14.7895	4.47368	7.57895	28.1632	36.9263	65.0895	73.8895	70.4789	110.816	144.368	2542.74	Venezuela
Albania	EUROPE	9.47368	4.84211	1.31579	95.3684	35.3684	20.1053	23	16.7895	14.5789	12.6737	732.842	11.8947	616.579	28.3684	26.1895	15.3684	5	11.0526	51.7211	43.5789	95.3	83.5211	94.9	127.1	178.421	2834.79	Albania
Armenia	EUROPE	4	1.31579	2.10526	76.2105	40.1579	9.84211	20	6.21053	11.6	10.2263	333.579	7.94737	268.368	11.8947	11.3789	18.4737	4.63158	8.63158	33.0947	25.7526	58.8474	55.1789	72.3789	80.9316	127.558	2482.53	Armenia
Austria	EUROPE	32.0526	11.3158	6.94737	302	52.4211	197.263	46.5263	3	35.8263	36.2368	708	53.5789	158.158	17.8895	22.3684	36.7895	26.8421	4.05263	95.8	67.3158	163.116	165	107.495	232.316	272.495	3714.42	Austria
Azerbaijan	EUROPE	5	1.31579	3.21053	52.1579	22.2632	1.78947	14.9474	13.1579	8.53158	7.10526	276.737	14.0526	157.526	9	9.81053	14	1	5.15789	26.3421	19.9316	46.2737	43.7737	74.9263	63.7053	118.7	2557.16	Azerbaijan
Belarus	EUROPE	32.8947	15.2105	4.94737	182.579	62.4211	82.3684	35.2632	0.526316	26.0421	22.8684	524.316	10.4211	280.368	12.4105	16.7526	41.3684	10.1579	13.8421	62.3158	50.1053	112.421	105.026	91.8158	155.132	196.842	3114.05	Belarus
Belgium*	EUROPE	65.0526	7.63158	8.31579	226.737	54.4211	100.947	59.2105	4.73684	20.9105	25.9684	662.842	48.5263	168.895	20.2684	24.2421	35.3684	34.1	10.4211	91.8737	62.8368	154.711	161.763	102.437	224.6	264.2	3709	Belgium*
Bosnia and Herzegovina	EUROPE	10.6842	4	3.52632	60.2632	21.7895	16.7368	20.6842	1.15789	9.37895	7.6	423.789	10.3684	323.632	14.2316	13.7579	13.4737	2.15789	5.47368	28.6684	24.9737	53.6421	61.2211	84.9368	86.1947	146.158	2934.84	Bosnia and Herzegovina
Bulgaria	EUROPE	10.8947	6.05263	2.63158	150.263	25	66.9474	44.6316	11	17.0895	18.5579	425.579	23.5263	252.474	15.3105	13.3316	29.3158	10.7895	13.8421	45.5579	39.2526	84.8105	92.6	82.9158	131.853	175.516	2798.21	Bulgaria
Croatia	EUROPE	30.4211	14.7895	2.47368	122.421	20.4211	74.4737	23.1579	2.47368	15.1053	13.1474	499.316	17.9474	305.211	15.4895	15.5895	27.9474	14.1053	4.52632	47.3895	35.9316	83.3211	91.2263	72.4632	127.158	163.689	2776.37	Croatia
Cyprus	EUROPE	54.0526	14.6842	4.47368	229.105	17	105.474	76.5263	24.3684	25.8211	26.3211	379.474	14.6842	273.895	17.4053	13.5632	24.7368	3	10.4737	52.3158	49.9368	102.253	111.853	82.9368	161.789	194.789	2676.74	Cyprus
Czech Republic	EUROPE	25.5263	8	5.89474	226.263	28.3684	127.474	58.6316	0.736842	23.9579	25.0842	540.368	37.0526	110.316	13.1263	20.0842	40.4737	10.8421	12.5789	61.9211	55.0579	116.979	121.521	93.4	176.579	214.921	3225.16	Czech Republic
Denmark	EUROPE	63.1053	23.2632	7.10526	232.316	67.4737	108.526	51.1053	2.89474	25.1053	27.4474	656	51.5263	128.105	18.2895	20.9737	45.5263	27.8947	29.1579	96.9474	68.1526	165.1	132.763	106.911	200.916	239.674	3361.21	Denmark
Estonia	EUROPE	46.5789	9.36842	8.57895	159.632	41	72	44.1053	1.31579	19.9421	18.5263	679.263	25.2105	397.474	20.3158	23.5263	32	3.89474	12	58.0632	52.8842	110.947	93.5526	92.9	146.437	186.453	3069.42	Estonia
Finland	EUROPE	91.2105	41.1053	31.3158	186.474	51.4737	90.4737	40.5263	1.05263	44.2526	23.0421	975.632	41.7895	364.421	25.6368	27.8158	25	2.31579	5.26316	92.3053	64.8684	157.174	128.526	103.958	193.395	232.484	3164.37	Finland
France	EUROPE	89.9474	18.4211	9.89474	258.158	72.9474	96.1579	65.6842	10.2632	40.9053	32.4737	716.526	64.3684	164.684	24.3421	24.7263	40.7895	10.6842	23.0526	103.489	74.9526	178.442	165.484	114.5	240.437	279.984	3556.26	France
Georgia	EUROPE	10.8947	7.31579	0.526316	73.1579	26.5789	22.7895	19.1053	4.42105	10.5842	8.98421	368.211	0.0526316	358.737	12.3	12.3737	15.2105	4.63158	7.05263	29.7895	25.6579	55.4474	54.8632	74.8737	80.5211	129.737	2647.26	Georgia
Germany	EUROPE	38.8421	9.31579	8.05263	229.684	36.5263	145.526	38.5263	2.52632	26.8789	26.7789	662.737	52.5263	186.158	15.5316	21.3947	33.5789	20.4211	7.84211	81.2947	58.4368	139.732	141.337	96.8211	199.774	238.158	3375.37	Germany
Greece	EUROPE	59.9474	12.8947	4.84211	218.947	55.8947	79.2105	41.4737	37.4737	21.9684	26.2421	740.368	71.1053	227.316	26.7474	25.0316	26.1053	1.47368	9.57895	57.2789	62.2316	119.511	147.747	114.274	209.979	262.021	3563.05	Greece
Hungary	EUROPE	11.9474	2.68421	5.63158	233.211	25.2105	127.053	77.7368	0.263158	27.9368	25.8632	450.053	25.4737	193.789	13.2053	14.9053	44.0526	42	6.47368	80.5947	49.0368	129.632	132.737	85.7579	181.774	218.495	3089.47	Hungary
Iceland	EUROPE	248.105	83.6842	8	222.842	34.1053	47.8421	43.4211	67.4737	40.8263	29.6211	682.421	53.9474	274.526	27.0263	27.4316	21.4737	4.68421	19.0526	94.9526	90.1211	185.074	134.189	125.789	224.311	259.979	3234.58	Iceland
Ireland	EUROPE	58.1579	15	5.47368	253.684	60.5263	97.5789	73.9474	18.0526	30.4211	32.0947	747.526	27.3158	451.947	24.7263	23.2789	21.2632	10.7368	28.8421	79.3737	68.7789	148.153	132.558	112.158	201.337	244.716	3595.26	Ireland
Italy	EUROPE	64.5263	11.8421	5.73684	238.842	66.8421	104.579	47.7895	4.05263	29.0947	30.3211	712.895	58.4211	101.421	17.8579	17.4526	32.8947	15.7368	9.36842	70.1158	60.2368	130.353	152.668	111.116	212.905	263.784	3591.79	Italy
Latvia	EUROPE	54.0526	25.3684	6.15789	145.947	33.4737	72.8421	38.2105	0.842105	19.1684	17.0789	592.474	17.8947	324.737	16.7526	19.5684	32.6842	17.4211	13.8947	65.3053	49.9789	115.284	107.984	89.7105	157.963	197.695	3083.16	Latvia
Lithuania	EUROPE	94.8421	57.6316	6.47368	172.421	39.8421	88.3684	42.6316	1.10526	23.4211	20.6053	593.263	24.1579	235.316	12.2053	19.1526	31.6842	9	17.2105	57.9053	58.4947	116.4	86.5105	109.1	145.005	195.611	3234.42	Lithuania
Luxembourg*	EUROPE	69.2105	7.78947	6.84211	264.263	75.3684	122.105	51.8947	4.84211	40.0737	31.8	680.632	34.4737	329.737	21.4105	24.3421	31.2632	16.3	16.2632	88.2526	69.2632	157.516	153.363	107.095	222.626	260.458	3578.05	Luxembourg*
Macedonia	EUROPE	13.1053	5.47368	2.42105	99.6316	25.4211	31.1053	36.2105	6.36842	15.6737	12.2421	327.632	8.42105	105.263	7.25263	11.0632	25.5263	8.10526	7.31579	40.5947	28.7053	69.3	90.0158	73.7105	118.721	163.726	2782.26	Macedonia
Malta	EUROPE	77.8421	37	4.63158	216.158	63.5789	85.3158	50.3158	4.52632	20.1316	26.4474	498.632	32.5789	228.947	18.1105	17.5316	38.7368	22.8421	6.84211	64.9632	57.4632	122.426	108.258	108.053	165.721	216.311	3326.53	Malta
Moldova	EUROPE	21.5789	10.1579	4.52632	76.8947	10.4211	37.9474	26.7895	1.42105	10.5632	9.46316	394.158	4.52632	334.737	12.6789	12.9526	20.7895	6.21053	9.21053	33.2158	28.5526	61.7684	60.0737	69.5368	88.6263	129.611	2592.26	Moldova
Netherlands	EUROPE	54.6316	23.8947	6	232.632	50.5789	120.421	47.9474	3.05263	33.2684	30.6684	959.737	52.1579	346.842	26.1158	29.5368	44.1579	14.4211	5.15789	81.7158	72.5421	154.258	138.942	106.021	211.484	244.963	3257.95	Netherlands
Norway	EUROPE	140	16.2105	21.5789	169.895	55.4211	64.0526	30.7368	15.4737	30.9158	20.7474	725.105	40.9474	204.895	20.8316	22.6105	28.4737	18.4737	6.10526	87.7526	63.9895	151.742	143.553	105.289	207.542	248.842	3405.42	Norway
Poland	EUROPE	27.8421	10.6316	5.84211	198.632	19.2632	133.263	45.2632	0.105263	27.6	25.5105	515.947	32.8421	140.263	15.5737	14.7368	28.9474	16.5789	7	72.7211	50.0947	122.816	113.658	99.4526	163.753	213.111	3382.84	Poland
Portugal	EUROPE	155.842	27.7368	3.15789	232.684	45	107.737	68.4737	8.63158	27.9632	29.1789	542.684	23.2105	157.579	12.6684	16.8421	25.5263	24.7895	15.8947	71.1737	66.7684	137.942	133.647	112.374	200.416	246.021	3524.42	Portugal
Romania	EUROPE	10.6842	5.73684	2.52632	152.368	21.6842	77	44	7.52632	17.2105	18.9368	607.158	8.36842	542.632	23.6316	21.3632	32.6842	9.68421	10.6842	53.6211	47.1842	100.805	96.0053	101.189	143.189	197.195	3233.37	Romania
Russian Federation	EUROPE	52.3684	18.6842	11.2105	147.368	52.2632	45.5789	42.2105	3.84211	19.1263	18.7632	410.526	12.7368	285.421	13.0316	14.7842	35.3158	5.63158	14	50.3474	46.3	96.6474	85.2842	92.0211	131.584	177.305	3064.37	Russian Federation
Serbia**	EUROPE	9.47368	1.57895	1.10526	202.579	41.7368	129.105	25.1053	6.47368	32.1316	23.0316	437.158	4.47368	380.737	14.1684	14.3632	19.2105	23.7	14.3684	68.6211	42.9632	111.584	106.016	81.0053	148.979	187.021	2767.74	Serbia**
Slovakia	EUROPE	20.2632	6.15789	2.89474	174.105	24.1579	107.895	38.1053	0.736842	19.0632	18.6	354.474	24.7368	107.105	9.97895	10.2947	38	26.3684	6.73684	61.7	36.5316	98.2316	103.347	74.7316	139.879	178.079	2857.89	Slovakia
Slovenia	EUROPE	23.3158	6.73684	2.73684	240.632	62.8421	110.789	63.6316	2	24.2526	28.4737	639.263	29.8947	195.947	16.0368	20.3947	24.2632	14.9474	16.7895	63.5632	57.4368	121	112.942	98.6947	170.379	211.637	3059.26	Slovenia
Spain	EUROPE	117	26.2632	7.73684	291.211	39.6842	156.737	72.1579	14.4211	31.0579	34.8684	461.684	19.7895	281	15.3	14.6158	37.6842	6.15789	12.0526	61.0105	69.3789	130.389	150.532	110.226	219.911	260.758	3301.74	Spain
Sweden	EUROPE	82.2105	24.8421	13.3684	200.526	58.8421	99.4737	32.8421	2.57895	22.9474	26.4211	985.053	48.4211	204.526	21.9053	28.6737	31.5263	10.4211	5	73.9316	69.3211	143.253	126.153	104.253	195.474	230.405	3113.37	Sweden
Switzerland	EUROPE	41.8947	6.89474	11.6316	201.263	58.9474	94.6316	37.0526	4.73684	40.9474	23.6842	858.579	48.1579	278.316	24.0632	24.1474	28.2632	12.5263	13.4211	92.9737	59.2842	152.258	152.621	94.1368	211.905	246.758	3396.11	Switzerland
Ukraine	EUROPE	35.4737	24.8947	3	109.263	34.8947	40.0526	31.3158	1.21053	14.5632	13.6632	443.474	7.05263	372.684	14.4474	14.4895	33.6842	7.21053	10.1053	44.8105	37.6	82.4105	82.3474	84.9947	119.947	167.342	3048.63	Ukraine
United Kingdom	EUROPE	54.0526	9.84211	7.52632	216.368	51.2632	69.5263	77.7368	16.5789	36.7105	27.5474	639.053	27.2105	328.368	20.7632	19.1526	27.6316	9.94737	7.57895	77.8789	56.6	134.479	140	100.216	196.6	240.216	3367.53	United Kingdom
Afghanistan	NORTH AFRICA & ASIA & OCEANIA	0	0	0	39.8947	17.0526	0	3.31579	18.0526	6.67368	5.81579	186	2.57895	104.421	6.20526	6.74211	2.15789	1.89474	6.36842	18.3526	13.8526	32.2053	33.3158	55.2053	47.1684	88.5211	1923.21	Afghanistan
Algeria	NORTH AFRICA & ASIA & OCEANIA	11.5263	9.36842	0	51.0526	13.1579	0	20.7895	16.3158	6.14211	6.54211	310.105	1.47368	212.316	8.54211	10.7421	10.7895	1	3.15789	18.0789	20.3053	38.3842	66.5579	80.6421	86.8632	147.2	2932	Algeria
Australia	NORTH AFRICA & ASIA & OCEANIA	62.7895	9.31579	4.36842	301.526	110	55.4737	92.4211	41.0526	33.7789	37.2842	614.105	27.6842	301.053	18.6947	18.8	16.5789	9.63158	26.7368	70.9895	68	138.989	135.616	103.332	203.616	238.947	3109.42	Australia
Bangladesh	NORTH AFRICA & ASIA & OCEANIA	36.8947	1	30.8947	9.73684	3.89474	0	3.10526	2.94737	1.08947	1.38947	44.4737	0	40.5263	1.55263	1.51579	3.26316	0	1.31579	4.57368	7.30526	11.8789	25.9526	49.6368	33.2579	75.5895	2268.53	Bangladesh
Brunei	NORTH AFRICA & ASIA & OCEANIA	97.8421	13.3684	8.31579	189.474	39.2105	19.6842	124.263	3.94737	19.7579	23.3316	233.368	2.36842	150.947	6.32632	7.92632	41.1053	0.578947	5.47368	36.2526	46.5737	82.8263	78.1842	87.2053	124.758	165.389	2896.37	Brunei
Cambodia	NORTH AFRICA & ASIA & OCEANIA	62.0526	0.684211	51.0526	42.4737	13.5263	23.2105	5.52632	0	10.1842	5.2	10.5263	0	9.05263	0.289474	0.368421	3.21053	2.15789	4.05263	14.5053	13.8895	28.3947	31.4158	53.5737	45.3053	84.9895	2197.68	Cambodia
Egypt	NORTH AFRICA & ASIA & OCEANIA	40.7368	8.42105	20	62.1053	29.4737	0	24.0526	3.84211	6.39474	8.34737	144.737	20.1053	44.4737	5.16842	4.70526	7.10526	1	5.15789	19.2211	19.0316	38.2526	57.9421	95.2947	76.9737	153.237	3382.47	Egypt
Fiji	NORTH AFRICA & ASIA & OCEANIA	88.3684	48.8947	1.78947	117.158	30.5789	12.7368	40.7895	33.2632	18.9947	15.0053	121.053	1.15789	104.632	3.94737	3.99474	10.4211	4.73684	9.89474	42.1895	30.7947	72.9842	96.3895	73.4737	127.184	169.863	2879.79	Fiji
China	NORTH AFRICA & ASIA & OCEANIA	69.3158	1.94737	29.2632	124.842	10.3158	79.7368	26.7895	6	33.3211	14.5947	46.3684	0.526316	41.2632	1.78947	1.66316	42.2632	4.73684	7.10526	44.7632	28.8842	73.6474	77.9158	84.1684	106.8	162.084	2829.79	China
India	NORTH AFRICA & ASIA & OCEANIA	13.3684	1.21053	8.10526	11.3158	5.21053	1	3.05263	2	1.21579	1.50526	179.211	0	115.421	5.05263	6.49474	4.94737	0	1	12.7632	10.2158	22.9789	46.6	56.3579	56.8158	102.958	2347.58	India
Indonesia	NORTH AFRICA & ASIA & OCEANIA	59.1053	26	14.3158	28.1579	5.68421	7.21053	13.5263	1.26316	4.67895	3.45789	24.1053	0	11.4211	0.489474	0.805263	9.89474	1	4.05263	8.76316	13.3684	22.1316	47.7789	54.9053	61.1474	102.684	2510.16	Indonesia
Iran	NORTH AFRICA & ASIA & OCEANIA	16.3158	5.57895	7	76.0526	15	0	44.3684	15.6316	8.81053	10.4211	162.526	9.78947	67.6316	4.91053	5.6	19.0526	0.0526316	6	22.5895	20.8105	43.4	67.3947	83.1684	88.2053	150.563	3046.79	Iran
Iraq	NORTH AFRICA & ASIA & OCEANIA	5.15789	0.157895	3.10526	22.4737	6	0	12.5263	3.78947	3.01579	3.01053	80.1579	3.10526	41.3684	2.57895	2.93684	7.21053	0.210526	1.47368	7.83684	7.48947	15.3263	59.6737	53.4895	67.1632	113.163	2295	Iraq
Israel	NORTH AFRICA & ASIA & OCEANIA	60.5789	12.2105	10.0526	238.421	63.2632	6.47368	164.789	4.21053	22.7	35.6526	548.789	47.7368	199.526	13.0316	19.3632	29.5263	2.26316	16.1579	44.1	66.6789	110.779	135.658	122.095	202.337	257.753	3539.74	Israel
Japan	NORTH AFRICA & ASIA & OCEANIA	172.737	44.2105	15.5789	122.421	26.6842	50.7368	43.7895	0.789474	11.9105	14.5895	215.526	6.68421	135.632	5.93158	7.75789	53.3158	2.15789	7.73684	35.3684	52.7895	88.1579	88.1632	93.8211	140.953	181.984	2844.21	Japan
Jordan	NORTH AFRICA & ASIA & OCEANIA	14.0526	7.10526	1	103.895	17.8421	0	70.7368	14.7895	11.2579	13.8947	210.368	7.31579	122.895	8.33158	7.61053	18.4737	1	2.47368	23.9105	25.2632	49.1737	86.8526	76.2053	112.116	163.058	2914.84	Jordan
Kazakhstan	NORTH AFRICA & ASIA & OCEANIA	9.26316	4.36842	3	144.158	53.9474	32.8421	20.5789	24.6842	21.8158	19.1895	600.474	3.63158	539.789	19.3474	19.7	17	2.57895	12.6316	49.7684	44.1737	93.9421	89.9895	90.9526	134.163	180.942	2959.95	Kazakhstan
Kuwait	NORTH AFRICA & ASIA & OCEANIA	35.3684	7.63158	4.10526	236.684	27.1053	0	151.947	55.9474	27.9789	30.3263	428.211	15.5789	177.526	11.5368	14.7316	33.7895	0	16.2632	50.8421	54.3474	105.189	112.705	104.158	167.053	216.863	3371.47	Kuwait
Kyrgyzstan	NORTH AFRICA & ASIA & OCEANIA	2.94737	2.52632	0	103.684	48.3684	14.1579	8.10526	27.3684	17.0211	14.1421	521.105	0.789474	505.263	17.2368	17.5579	8.68421	0.368421	8.57895	36.9474	34.4737	71.4211	57.8947	83.2526	92.3684	141.147	2596.47	Kyrgyzstan
Laos	NORTH AFRICA & ASIA & OCEANIA	37.1053	0.947368	35.3684	43.9474	17.4737	18.3158	7.63158	0.157895	9.09474	5.17895	9.57895	0	8.42105	0.242105	0.331579	4.31579	2	4.05263	12.4579	10.8158	23.2737	29.0158	56.6368	39.8316	85.6526	2150.53	Laos
Lebanon	NORTH AFRICA & ASIA & OCEANIA	22.2105	8.73684	1.57895	131.789	47.4211	7.63158	67.1579	9.52632	17.0579	17.7526	297.211	27.1053	125.526	9.90526	9.74737	20.7895	3.73684	5.84211	37.5263	33.0579	70.5842	108.984	87.3316	142.042	196.316	3244.58	Lebanon
Libya	NORTH AFRICA & ASIA & OCEANIA	29.6842	15.4737	0	90.1053	13.7368	0	52.1579	21.4737	10.5947	12.2263	243.316	5.84211	159.263	8.95263	8.89474	25.9474	1	4.36842	25.3211	27.5211	52.8421	95.1947	80.3474	122.716	175.542	3209.79	Libya
Malaysia	NORTH AFRICA & ASIA & OCEANIA	157.211	52.8421	10.2632	137.053	14.7368	26.5263	94	1.84211	19.5263	16.6	123	0.684211	42	3.03684	3.37368	33.7368	2.31579	9.57895	32.6211	42.4368	75.0579	85.9789	76.7474	128.416	162.726	2845.89	Malaysia
Maldives	NORTH AFRICA & ASIA & OCEANIA	429.789	261.474	0.315789	44.8421	10.5789	2.73684	22.4737	1.31579	3.94211	6.17895	179	0.0526316	144.632	5.31579	6.08421	20.8947	0	0	25.5474	62.9105	88.4579	57.8	94.5263	120.711	152.326	2481.47	Maldives
Mongolia	NORTH AFRICA & ASIA & OCEANIA	0.578947	0	0	233.895	67.0526	0.315789	1.05263	123.842	39.1053	31.4474	361	1.84211	330.737	12.3947	11.6421	1.52632	8.15789	30.5263	61.8211	48.5211	110.342	79.2474	76.1421	127.768	155.389	2196.05	Mongolia
Morocco	NORTH AFRICA & ASIA & OCEANIA	27.2632	16.3158	0.263158	63.8421	14.5263	0	32	13.1053	6.68421	8.63158	105.474	2.05263	33.8947	1.92632	3.45789	17.3684	1.73684	4.36842	16.1158	17.7053	33.8211	61.1737	86.5737	78.8789	147.747	3155.16	Morocco
Myanmar	NORTH AFRICA & ASIA & OCEANIA	71.2632	0.157895	25.8947	47.2105	6.84211	13.8947	25.3684	0.947368	8.47368	5.65789	52	2.63158	29.6316	1.59474	2.31579	7.52632	1.21053	1.89474	14.0789	15.9579	30.0368	47.2579	57.5316	63.2158	104.789	2051.05	Myanmar
Nepal	NORTH AFRICA & ASIA & OCEANIA	3.94737	0	3.89474	28.5789	20.3158	1.84211	1.73684	5.05263	2.66316	3.57368	115.842	0	87.4211	5.15789	4.24737	2.73684	1.21053	5	11.6895	9.5	21.1895	41.3105	59.7211	50.8105	101.032	2353.05	Nepal
New Zealand	NORTH AFRICA & ASIA & OCEANIA	68.3158	24.7368	3.78947	292.158	81.3684	51.6842	81.1579	70.4737	34.2579	34.7842	309.895	14.7368	161.737	9.55789	8.73684	28.2632	15.2105	14	82.8368	56.3421	139.179	117.021	94.3053	173.363	211.326	3158.89	New Zealand
Oman	NORTH AFRICA & ASIA & OCEANIA	73.3	37.2	0.5	132.6	24.5	0.4	64.5	36	15.4	17.5	326.3	8.7	232.4	11.3	11.4	19	2.1	7.1	35.5	39.1	74.6	74.3	76.6	113.4	150.9	2664.5	Oman
Pakistan	NORTH AFRICA & ASIA & OCEANIA	5.78947	1	3.52632	36.1053	18.8947	0	7.89474	9.21053	4.26842	4.77368	422.684	0	239.579	13.8211	16.1316	6	2.94737	5.15789	31.2053	23.0947	54.3	67.5737	61.2632	90.6684	128.837	2380.53	Pakistan
Philippines	NORTH AFRICA & ASIA & OCEANIA	86.8947	47.9474	16.1053	79.7895	11.2105	44.6316	22	1.26316	18.2632	9.54211	46.4211	0.578947	8.68421	0.510526	1.62105	10.0526	5.84211	4.31579	26.8421	22.7474	49.5895	47.4947	55.7474	70.2421	103.242	2427.95	Philippines
Saudi Arabia	NORTH AFRICA & ASIA & OCEANIA	20.8421	6.68421	4	135.316	11.6316	0	100.053	18	13.9421	17.8947	209.947	5.84211	126.158	6.67368	7.6	12.4737	1	9.68421	26.9684	30.6158	57.5842	83.0368	81.1368	113.653	164.174	2980.53	Saudi Arabia
Solomon Islands	NORTH AFRICA & ASIA & OCEANIA	99.7368	57.4737	0	25.5789	8.89474	15	3.73684	0.0526316	6.56316	3.57895	21.6842	0	16.5263	0.663158	0.726316	2	2.52632	0.947368	13.1474	17.0474	30.1947	48.1895	53.5368	65.2368	101.726	2384.58	Solomon Islands
South Korea	NORTH AFRICA & ASIA & OCEANIA	145.105	41.3158	2.94737	131.579	31	68	31.8421	0.263158	16.6	14.9421	69.1579	1.89474	31.9474	1.58421	2.47895	27.6842	4.36842	9	31.1737	37.8947	69.0684	81.0105	88.1421	118.905	169.153	3101.37	South Korea
Sri Lanka	NORTH AFRICA & ASIA & OCEANIA	57.4737	44.2105	4.68421	16	4.42105	0	11	0	1.42105	2.08421	89.3158	0	76.8947	3.02105	2.97368	6.36842	0.631579	1.94737	7.66842	13.4684	21.1368	44.2526	53.4105	57.7211	97.6632	2339.37	Sri Lanka
Syria	NORTH AFRICA & ASIA & OCEANIA	5.47368	3.15789	1.94737	55.6316	8.05263	0	20.6842	26.3684	9.36316	7.47895	266.579	14.5263	179.421	12.5105	10.1053	17.6842	2.84211	5.21053	30.1579	20.9158	51.0737	100.016	75.8842	120.932	175.9	3030.16	Syria
Tajikistan	NORTH AFRICA & ASIA & OCEANIA	0.210526	0.157895	0.105263	28.8421	15.3684	1.73684	3.05263	8.52632	5.43158	3.96842	150.526	4.05263	135.053	5.08947	5.18421	2.57895	0	3.57895	11.8368	10.1158	21.9526	52.0105	50.3684	62.1263	102.379	2005.42	Tajikistan
Thailand	NORTH AFRICA & ASIA & OCEANIA	79.4737	27.2105	22.1579	75.6316	9.84211	30.4737	35.1579	0	14.4579	9.08947	65.2105	0	29.3684	1.05789	1.96842	27.7895	1.05263	2.68421	22.3	23.7737	46.0737	55.0632	58.4789	78.8368	113.542	2615.05	Thailand
Timor-Leste	NORTH AFRICA & ASIA & OCEANIA	3.47368	0.210526	0	100.842	5.05263	26.6842	14.9474	1.31579	14.2263	14.3737	27.1053	0	20.5263	0.794737	0.963158	3.42105	1.26316	3	16.7053	16.6474	33.3526	37.4789	53.3737	54.1263	90.8526	1990.32	Timor-Leste
Tunisia	NORTH AFRICA & ASIA & OCEANIA	30.3158	18.1053	0.526316	67.7368	16.5789	0	31.1579	16.7895	7.45263	9.32632	258.368	1.31579	198.737	7.65789	8.26316	18.8947	0.947368	4.05263	20.3263	23.4684	43.7947	89.2684	90.3053	112.737	179.574	3253.74	Tunisia
Turkey	NORTH AFRICA & ASIA & OCEANIA	21.7368	13.2105	3.21053	63.0526	16.1053	0	32.4211	14.3684	6.55789	8.51053	380.579	5.63158	294.263	11.9211	13.0737	26.0526	0.315789	3.05263	26.8526	27.4737	54.3263	102.995	104.3	130.468	207.295	3645.42	Turkey
Turkmenistan	NORTH AFRICA & ASIA & OCEANIA	7.94737	0.368421	7.68421	112.737	52.8421	0.894737	7.73684	49.8947	21.2579	15.8	384.474	1.31579	362.368	12.1842	12.9158	16.2632	3.68421	2	41.4105	31.7	73.1105	72.2263	83.2895	103.926	155.516	2706.74	Turkmenistan
United Arab Emirates	NORTH AFRICA & ASIA & OCEANIA	67.7368	23.3158	1.10526	210.789	31.5263	0	122.632	44.1053	23.4421	27.2421	373.526	13.6842	247.895	12.8053	12.9316	27.6316	3.15789	9.47368	48.8526	50.9632	99.8158	95.7474	107.047	146.711	202.795	3257.21	United Arab Emirates
Uzbekistan	NORTH AFRICA & ASIA & OCEANIA	1.21053	0.0526316	1.05263	70.8421	56.1579	1.94737	3.63158	8.78947	12.9842	10.1632	383.895	1.57895	368.895	12.5053	12.7316	9.63158	2.52632	8.73684	29.3368	25.6158	54.9526	68.4684	73.9842	94.0842	142.453	2515.26	Uzbekistan
Viet Nam	NORTH AFRICA & ASIA & OCEANIA	61.7368	1.10526	22.8421	85.4737	8.89474	59.9474	15.6316	0.0526316	23.3105	9.71579	22.7895	0	11.4211	0.478947	0.836842	6.15789	3.73684	7.42105	29	18.8579	47.8579	47.5789	59.9737	66.4368	107.553	2333.32	Viet Nam
Yemen	NORTH AFRICA & ASIA & OCEANIA	14.5789	10.9474	0	40.3158	10.1053	0	22.1579	7.26316	5.33158	5.43684	93.2632	3.36842	21.8947	1.73684	3.17895	4.57895	1	3.31579	9.93158	11.3474	21.2789	42.2737	56.6842	53.6211	98.9579	2096.21	Yemen
Angola	SUBSAHARAN AFRICA	36.2105	14.4737	2	52.5789	21.2105	11.6316	15.8947	2.42105	8.32632	7.01053	42.0526	0.315789	31.7368	1.26316	1.33684	2.68421	1.21053	3.10526	11.7737	12.7316	24.5053	42.1105	42.7	54.8421	84.8105	1954.63	Angola
Benin	SUBSAHARAN AFRICA	27.9474	4.73684	10.3158	38.2105	7.84211	2	22.1579	2.47368	3.01053	5.21053	25.6316	0	21.8947	0.789474	0.831579	2.21053	1.05263	2.15789	5.58421	9.55789	15.1421	45.3316	56.5	54.8895	101.832	2366.42	Benin
Botswana	SUBSAHARAN AFRICA	7.94737	4.57895	0.631579	71	24.5263	2.36842	12.5789	12.1053	5.62632	10.9737	287.737	6.89474	213.316	7.81579	10.0526	5.42105	3.42105	9.73684	19.7737	24.2789	44.0526	53.0105	63.7684	77.2895	116.779	2162.21	Botswana
Burkina Faso	SUBSAHARAN AFRICA	7.47368	2.78947	1.84211	41.8421	19.3158	5.10526	6.10526	9	5.88947	5.86316	56.1579	0	52	2.4	2.15789	7	1.21053	6.47368	10.6368	10.6684	21.3053	54.3526	73.0263	65.0211	127.379	2444.21	Burkina Faso
Cabo Verde	SUBSAHARAN AFRICA	42.8421	27.8947	0	87.7895	6.94737	51.7895	23.6316	4	17.2842	10.4263	268.316	1.89474	234.947	9.06842	9.09474	12.1579	10.3158	5.15789	37.5474	26.5632	64.1105	75.5526	65.3895	102.116	140.942	2466.58	Cabo Verde
Cameroon	SUBSAHARAN AFRICA	37	16.6842	8.84211	40.0526	14.8421	3.68421	7.47368	5	4.61579	5.88421	40.0526	0	38.8947	1.50526	1.38421	1.57895	1	3.78947	7.96842	11.9737	19.9421	47.0421	57.6632	59.0158	104.705	2236.89	Cameroon
Central African Republic	SUBSAHARAN AFRICA	16.6316	0.842105	15.2632	86.5789	48.1053	9.36842	2.78947	9.10526	11.1842	12.7263	46.4737	0	46.1053	1.62105	1.45263	1.52632	2.73684	8.10526	15.9789	17.6316	33.6105	63.7737	47.2526	81.4053	111.026	2001.26	Central African Republic
Congo	SUBSAHARAN AFRICA	60.4211	21.7895	23.4737	53.5789	8.10526	6.15789	21.5789	1	4.40526	7.77895	37.5263	0	34.7368	1.24737	1.25789	1.52632	0	5.05263	7.71053	16.8105	24.5211	49.2895	44.4947	66.1	93.7842	2112.11	Congo
Côte d'Ivoire	SUBSAHARAN AFRICA	42	19.7895	1.94737	39.4737	6.78947	1.78947	4.63158	2	2.71053	6.37895	22.9474	0	19	0.678947	0.763158	4.15789	0	5.89474	5.43158	13.3263	18.7579	53.0789	54.0895	66.4053	107.168	2678.05	Côte d'Ivoire
Djibouti	SUBSAHARAN AFRICA	4.68421	2.94737	0	49.4737	22.6316	1.10526	6.26316	16.8421	7.07368	6.86842	158.105	0.736842	153.368	5.75789	5.47368	0.210526	1.63158	9.52632	15.6368	14.6474	30.2842	50.3	50.6947	64.9474	100.995	2064.58	Djibouti
Ethiopia	SUBSAHARAN AFRICA	0.421053	0	0.421053	20.6842	12.2632	0	2	3.57895	3.11579	3.06842	74	0	61.3684	2.22105	2.51579	1	1	3.52632	6.91579	6.39474	13.3105	20	52.6211	26.3947	72.6211	1829.63	Ethiopia
Gabon	SUBSAHARAN AFRICA	110.316	46.5789	20.0526	155.368	30.4737	19.1053	52.1053	3.31579	12.3368	22.5789	87.5789	1.05263	70.4211	2.76842	2.87895	4.31579	0.947368	14	20.0737	39.6632	59.7368	54.5737	78.8684	94.2368	133.442	2666.42	Gabon
Gambia	SUBSAHARAN AFRICA	71.4211	46.7368	6.21053	21.4737	8.21053	1.10526	6.52632	2.47368	2.36316	3.04737	74.5263	0.0526316	67.5263	2.46316	2.47895	4.10526	0	2.36842	7.86842	14.3316	22.2	73.2316	58.1632	87.5632	131.395	2512.47	Gambia
Ghana	SUBSAHARAN AFRICA	76.0526	53.7368	11.4737	32.8947	4.36842	2.36842	8.68421	3.05263	2.40526	4.86316	16.8947	0	7.78947	0.3	0.621053	2.36842	0.0526316	2	5.75789	15.3316	21.0895	41.5316	52.9737	56.8632	94.5053	2602.68	Ghana
Guinea	SUBSAHARAN AFRICA	28.2632	12.5263	1.78947	18.4211	11.2105	0.894737	2.10526	2.89474	2.17895	2.65789	34.1579	0	31.7895	1.16842	1.10526	3.84211	0.368421	2.52632	4.84211	7.64211	12.4842	54.3947	51.9526	62.0368	106.347	2418	Guinea
Guinea-Bissau	SUBSAHARAN AFRICA	8.21053	1.26316	0.210526	41.2105	10.6316	23.2632	3.63158	3.36842	8.83684	5.23684	45.2632	0	42	1.65263	1.54737	1.68421	1.94737	4.21053	12.2053	8.48421	20.6895	55.7579	43.6789	64.2421	99.4368	2263.53	Guinea-Bissau
Chad	SUBSAHARAN AFRICA	16.4737	0	16.2105	36.9474	23.8947	0	1.42105	9.78947	3.96842	5.52632	65.2632	0	64.5789	2.50526	2.08421	1	1	6.15789	8.36316	11.2684	19.6316	55.6632	60.5316	66.9316	116.195	1965.84	Chad
Kenya	SUBSAHARAN AFRICA	11.8421	0.578947	11.0526	40.1579	27.5263	1	1.78947	5.94737	5.6	5.81053	246.105	0	238.526	8.76842	7.45263	4.21053	1	5.73684	16.3895	15.9895	32.3789	47.7895	58.7895	63.7789	106.579	2077.95	Kenya
Lesotho	SUBSAHARAN AFRICA	1.15789	0.631579	0	50.2105	15.7368	6.21053	10	8.78947	6.27895	7.2	50.3158	0.368421	47.2632	1.8	1.56842	1.73684	1.10526	4.84211	9.60526	10.0105	19.6158	33.8947	69.8579	43.9053	103.753	2486.84	Lesotho
Liberia	SUBSAHARAN AFRICA	12.1053	4.57895	3.26316	28.3158	1.78947	6.21053	10.6842	1.26316	3.23684	4.02632	8.05263	0	6.10526	0.242105	0.278947	4.94737	0.0526316	1.15789	4.53158	6.22105	10.7526	57.2	36.9842	63.4211	94.1842	2127	Liberia
Madagascar	SUBSAHARAN AFRICA	18.2632	4.10526	5.57895	43.9474	23.2632	7.84211	10.0526	1.57895	7.02105	6.02105	84.9474	0	83.0526	2.9	2.63158	2.15789	1.26316	5.84211	11.8	11.9895	23.7895	27.7947	47.4211	39.7842	75.2158	2033.89	Madagascar
Malawi	SUBSAHARAN AFRICA	13.8421	0	13.4211	15.5263	4.89474	4.57895	3.57895	2.52632	3.03684	2.01053	11.4737	0	10.3684	0.373684	0.368421	3.73684	0.736842	1.78947	4.87368	4.61579	9.48947	31.3211	56.5158	35.9368	87.8368	2165.63	Malawi
Mali	SUBSAHARAN AFRICA	25.8947	0.526316	24.1579	56.4737	21.4737	1	7.89474	18.2105	5.76842	8.29474	215.526	0	212.053	9.32105	7.84211	1.57895	1.15789	7.68421	17.3316	20.1789	37.5105	56.8632	72.1368	77.0421	129	2545.37	Mali
Mauritania	SUBSAHARAN AFRICA	23.6842	8.63158	10.3684	78.1579	18.0526	0.0526316	7.15789	31.8947	8.18947	10.6842	382.684	2.42105	350.211	15.8632	14.8579	4.57895	1.78947	11.1053	28.4684	30.7105	59.1789	69.3211	77.1	100.032	146.421	2651.11	Mauritania
Mauritius	SUBSAHARAN AFRICA	54.8947	19.1579	1.10526	110.263	19.9474	7.05263	69.3158	11.8421	10.9263	14.5263	313.526	5.73684	187.895	8.39474	10.8	17.6316	0.789474	4.84211	25.4316	34.0316	59.4632	85.7368	80.2579	119.768	165.995	2956.79	Mauritius
Mozambique	SUBSAHARAN AFRICA	9.68421	0.0526316	2.94737	24.9474	2.68421	13.9474	4.94737	3.10526	6.24211	2.97368	14.7895	0	10.5789	0.431579	0.489474	0.789474	0.894737	2	7.91053	4.92105	12.8316	37.9789	39.5158	42.9	77.4947	2029.42	Mozambique
Namibia	SUBSAHARAN AFRICA	35.3158	13.7895	3	78.9474	24.6842	7.68421	22.1579	14.7368	9.44737	11.1316	166.632	2.84211	121.316	5.22632	4.87368	3.47368	5.63158	10.3684	21.8263	21.8895	43.7158	45.8421	60.6421	67.7316	106.484	2138.21	Namibia
Niger	SUBSAHARAN AFRICA	4.10526	0	4.05263	57.0526	29	0	2.78947	15.8421	6.31579	8.29474	161.842	9.89474	59.4737	5.02105	5.62105	1.05263	1.94737	8.15789	15.1842	15.9474	31.1316	48.0105	69.5579	63.9579	117.568	2319.74	Niger
Nigeria	SUBSAHARAN AFRICA	28.6316	13.4211	5.10526	24.5263	6.47368	3.78947	4.31579	7.26316	2.81579	3.37895	19.2632	0	11.9474	0.426316	0.694737	9.05263	1	2.73684	5.57368	8.36842	13.9421	62.3684	59.7632	70.7368	122.132	2639.32	Nigeria
Rwanda	SUBSAHARAN AFRICA	2.68421	0	2.21053	14.3684	6.89474	1.42105	0.894737	1.57895	1.7	2.17895	46.1579	0	41.1053	1.54737	1.47368	1	0.157895	1.68421	3.93158	4.38947	8.32105	19.9211	45.4211	24.3105	65.3421	1894.42	Rwanda
Senegal	SUBSAHARAN AFRICA	77	50.8947	10.6316	33.8421	13.2632	2	7.94737	6.89474	4.15263	4.72105	79.5789	0	53.8421	2.1	2.72105	4.10526	1.10526	4.73684	9.85263	16.9316	26.7842	65.8263	58.3947	82.7579	124.221	2242.16	Senegal
Sierra Leone	SUBSAHARAN AFRICA	59.6842	32.5263	10.3158	16	4.05263	1.52632	6.05263	1.15789	1.41579	2.19474	13.8421	0	11.6842	0.442105	0.452632	3.21053	0	1.21053	3.67368	9.61053	13.2842	53.6947	48.5737	63.3053	102.268	2131.84	Sierra Leone
South Africa	SUBSAHARAN AFRICA	19.5263	12.1053	0	122.842	39.1053	10.1053	61.8947	10.3158	18.3211	17.2632	146.526	2.63158	110	4.84211	4.57368	15.7368	1.05263	10.7368	27.5789	27.8421	55.4211	76.0421	76.8789	103.884	152.921	2894.11	South Africa
Sudan	SUBSAHARAN AFRICA	4.4	0	4	62.6	22.7	0	2.2	27.7	10	9.13	452.4	11.1	370.9	21.2	16.82	2.3	2.05	12.3	35	28.65	63.65	68.6	72.24	97.25	140.84	2247.1	Sudan
Swaziland	SUBSAHARAN AFRICA	11.0526	4.21053	2.15789	77.8947	50.7895	4.89474	14.3158	6.73684	9.70526	11.2421	156.105	2.26316	133.316	5.23684	5.11053	7.84211	1.05263	6.15789	18.1684	19.4158	37.5842	46.1368	60.4789	65.5526	106.616	2299.05	Swaziland
Tanzania	SUBSAHARAN AFRICA	21.8421	1.10526	18.4211	27.4737	18.7895	1	3.31579	3	3.71053	3.94211	81.2632	0.421053	56.1579	2.35789	2.58421	2.42105	1.15789	3.63158	8.71053	10.1789	18.8895	36.8105	54.3842	46.9895	91.1947	2086.63	Tanzania
Togo	SUBSAHARAN AFRICA	25.7895	14.3684	3.52632	25.5263	4.15789	3.68421	10.6316	4.05263	3.06316	3.45263	11.3684	0	9.68421	0.363158	0.368421	2.63158	0.842105	1.89474	4.91053	7.20526	12.1158	45.9684	51.5316	53.1737	97.5	2195.32	Togo
Uganda	SUBSAHARAN AFRICA	27.2105	0	27.2105	32.4737	12.8421	9	4.68421	3.21053	6.29474	4.29474	74.4211	0	74	2.58947	2.31579	2.15789	1.36842	3.94737	11.0895	10.4737	21.5632	40.6421	49.9	51.1158	90.5421	2268.68	Uganda
Zambia	SUBSAHARAN AFRICA	20	0	18.9474	36.9474	14.4211	3.26316	8.78947	1.57895	4.06316	5.37368	23.2105	0	18	0.726316	0.726316	9.10526	1	2.89474	6.96316	9.69474	16.6579	34.0263	49.6947	43.7211	83.7211	1917.11	Zambia
Zimbabwe	SUBSAHARAN AFRICA	5.57895	1.21053	3.63158	41.2632	18.2632	4.78947	9	3	4.71053	5.78947	79.2632	1	65.2105	2.36842	2.42105	3.89474	5.63158	3.84211	12.8684	9.96316	22.8316	53.1	49.0211	63.0632	102.121	2042.84	Zimbabwe
	MEAN	43.2326	15.1355	6.72169	117.735	31.6012	33.5745	38.4418	9.45913	15.3409	14.8849	299.448	11.5117	169.009	9.24434	9.88644	17.1455	5.80838	7.63578	35.8726	32.7553	68.6279	78.578	75.7909	111.333	154.369	2710.92
NOTES:
* Data for 1993-1999 are for Belgium & Luxembourg
** Data for 1993-2005 are for Serbia & Montenegro
ᴬ Listed as "Milk products (excluding butter)" in the FAOSTAT database.
ᴮ Listed as "Whole Milk" in the FAOSTAT database.

## Sheet: 3-Health statistics
	Health statistics
		Raised blood pressure (Men)	Raised blood pressure (Women)	CVD mortality (Men)	CVD mortality (Women)	Raised cholesterol (Men)	Raised cholesterol (Women)	Raised fasting blood glucose (Men)	Raised fasting blood glucose (Women)	Mean BMI (Men)	Mean BMI (Women)	Obesity (Men)	Obesity (Women)	Life expectancy (Men)	Life expectancy (Women)	Health expenditure (2012)		Current smoking of any tobacco product (Men)	Current smoking of any tobacco product (Women)	Daily smoking of any tobacco product (Men)	Daily smoking of any tobacco product (Women)	Current smoking of cigarettes (Men)	Current smoking of cigarettes (Women)	Daily smoking of cigarettes (Men)	Daily smoking of cigarettes (Women)	Insufficiently active adults (Men)	Insufficiently active adults (Women)
		18+ years, age-standardized; systolic ≥140 or diastolic ≥90 prevalence in %)		Age-standardized, per 100 000 population		25+ years, age-standardized; ≥5.0 mmol/L (prevalence in %)		18+ years, age-standardized; ≥7.0 mmol/L or on medication prevalence in %)		kg/m2, 18+ years, age-standardized		18+ years, age-standardized (prevalence in %)		life expectancy at birth, years		Purchasing power parity, constant 2011 international $		(prevalence in %)		(prevalence in %)		(prevalence in %)		(prevalence in %)		(prevalence in %)
Argentina	AMERICA	27.6	19	247.8	148.4	50.6	50	8.9	7.7	27.4	27.1	21	26.2	72.066	79.754	1133.04	Argentina	31	19.9	22.2	14.3	28.2	18	21.4	13.5	35.8	42.7	Argentina
Bahamas	AMERICA	27.8	19.6	292.5	169.6	49.3	53.7	11.6	12.1	27.5	29.2	26.4	40.2	71.953	78.024	1725.58	Bahamas									29.6	56.3	Bahamas
Barbados	AMERICA	26.5	21.4	159.8	102.6	39.5	45.1	12.3	14.2	26.8	29.5	20.7	35.9	72.832	77.627	1160.82	Barbados	13.1	1	9.3	0.7	10.2	0.8	7.1	0.5	29.3	45.9	Barbados
Belize	AMERICA	25.4	21.7	201.6	180.8	30.7	37.4	9.9	12.7	27.1	29.8	14.4	27.2	67.231	72.713	449.98	Belize											Belize
Bolivia	AMERICA	20.3	16.7	308.7	236.9	34.3	37.7	6.3	7.9	24.2	26.8	10.6	19.9	65.084	69.925	333.497	Bolivia											Bolivia
Brazil	AMERICA	27.2	21.6	258.9	177.7	44	44	7.9	7.1	25.5	25.7	15.1	20.4	70.143	77.721	1257.33	Brazil	20.3	12.1	16.3	9.4	17.9	10.3	15	8.3	25.9	29.7	Brazil
Canada	AMERICA	17.9	12.4	112.2	68.1	53.4	52.9	7.6	5.7	27.4	26.6	24.6	27.2	79.14	83.441	4585.42	Canada	18.9	13.6	13.9	9.9	18.3	13	13.7	9.7	20.3	26.2	Canada
Colombia	AMERICA	25.1	20.8	178.2	128	41.1	43.2	7.9	8.2	25	26.2	14.2	23.6	70.102	77.336	835.685	Colombia	16.8	6.6	11.8	4.6	13.8	5.5	8.7	2.9	54.3	72.9	Colombia
Costa Rica	AMERICA	24.8	19.8	163	118.4	37.4	44.6	8.8	8.4	26.4	26.7	17	27.1	76.635	81.593	1322.4	Costa Rica	19.3	8.9	11.3	5.1	16.1	7.6	9.4	4.2			Costa Rica
Cuba	AMERICA	24.4	20.4	214.4	157.2	27.9	35.5	7.7	8.9	25.1	26.3	16.1	28.9	77.106	81.279	1704.37	Cuba	53.1	19.1	33.2	13.7	42.2	14.8	30.8	11.3			Cuba
Dominican Republic	AMERICA	26.7	22.3	187	208.7	28	36.2	8.7	9.7	25.5	26.9	15.2	26.8	70.068	76.356	500.381	Dominican Republic	19	10	14.7	8	13.6	7.2	11.6	6.2	31.5	40.3	Dominican Republic
Ecuador	AMERICA	20.7	16.5	170.3	130.3	38.2	41.2	7.4	8.1	26	27.3	12.6	20.9	72.713	78.289	678.108	Ecuador	14.7	3.5	7.1	1.9	11.9	2.8	6.4	1.4	19.6	30.8	Ecuador
El Salvador	AMERICA	24.3	21.1	191.9	155	31.4	37.7	9.9	10.3	26.4	27.6	14.4	25.1	67.746	76.942	526.718	El Salvador											El Salvador
Guatemala	AMERICA	24	22.3	139.2	108.6	23.3	31.6	9.7	10.1	25.6	26.7	11.7	22.1	67.805	74.866	441.681	Guatemala									11.5	15	Guatemala
Guyana	AMERICA	23.8	21.4	709.7	451	20.3	26.7	9.2	11.5	24.6	27.1	12.1	29.3	63.968	68.579	424.279	Guyana											Guyana
Haiti	AMERICA	26.3	25.9	394.1	374.8	19.4	25.4	7.4	7.4	23.8	23.5	6	14.6	59.969	64.201	166.549	Haiti	21.5	2.7	15.6	2	17.8	2.3	8.9	1			Haiti
Honduras	AMERICA	24.8	22.3	240.1	164.4	26.5	33.3	8.3	9.3	25.2	26.9	11	21.9	70.316	75.316	421.883	Honduras	35.9	2.3	21.1	1.4	26.1	1.8	18.8	1.1			Honduras
Chile	AMERICA	26.6	19	145.2	90.4	48.6	48.1	9.6	9.1	27.2	27.7	21	29.6	77.949	83.988	1538.74	Chile	41	36.8	29.4	25.8	34.9	30.5	25	21.1	17.8	24.9	Chile
Jamaica	AMERICA	25.4	20.5	265.5	204.3	27.1	34	8.8	11.9	25.1	28.6	15.7	33	70.802	75.887	480.895	Jamaica	29.7	6.2	21.8	4.7	24.8	5.2	15.3	3.5	23.9	31.8	Jamaica
Mexico	AMERICA	24.7	19.9	170.1	130.3	47.4	53.6	10.3	10.2	27.2	28.3	20.7	30.7	73.978	78.849	1051.52	Mexico	22.5	7.3	13.1	4	20.7	6.6	12.6	3.8	20.3	31.8	Mexico
Nicaragua	AMERICA	24.7	22.9	262	197.8	27	32.9	8.9	10.1	25.7	27.4	9.8	21.5	71.231	77.343	359.192	Nicaragua											Nicaragua
Panama	AMERICA	24.7	19.7	179.4	125.3	40.1	45.3	9.2	9.6	26	27.2	17.6	30	74.239	80.385	1320.36	Panama	11.9	2.8	6.2	1.5	10.4	2.4	5.6	1.3			Panama
Paraguay	AMERICA	26.9	21.5	261.7	179.7	36.4	40.1	6.9	6.7	25.3	25.6	11.6	17.5	70.594	74.817	769.243	Paraguay	30.3	8.6	18.6	5.1	24.2	7	16	3.7	22.1	27	Paraguay
Peru	AMERICA	18	14.1	143.3	105.3	37.5	39.4	7.2	8	25.2	26.6	13.5	23.5	71.464	76.781	571.706	Peru		6.3		4.3		5.3		2.2			Peru
Trinidad and Tobago	AMERICA	25.7	21.8	346.5	220.7	36.5	41.1	13	14.5	27.2	28.8	19.1	34.6	66.747	73.726	1686.62	Trinidad and Tobago									30.1	52.9	Trinidad and Tobago
Suriname	AMERICA	26.2	21.9	169.1	143.2	32.1	38.6	10.4	11.5	26	27.7	16.5	30.2	67.679	74.09	955.966	Suriname											Suriname
United States of America	AMERICA	17.5	12.3	169.5	107.8	52.9	54.2	8.6	6.9	28.5	28.5	29.8	32.5	76.4	81.2	8789.77	United States of America	20.3	15.9	16.1	12.6	20.3	15.9	16.1	12.6	25.4	39.3	United States of America
Uruguay	AMERICA	27.6	19.7	197.3	110.1	43.3	40.9	8.6	8	26.3	26.6	19.8	27.5	73.184	80.368	1640.66	Uruguay	28.8	21.1	22.3	15.7	25.9	18.6	20.8	14.6	26.2	37.3	Uruguay
Venezuela	AMERICA	25.3	19.4	226.3	152.1	33.4	43.1	9.6	8.4	27.1	26.9	18.8	27.9	69.875	78.179	865.23	Venezuela											Venezuela
Albania	EUROPE	32.1	25.7	447.4	417.6	46.3	44.3	8.1	7.5	26.3	25.6	14.6	17.5	74.389	80.46	544.006	Albania	51.7	8	41.7	6.2	44.4	5	38.4	4.6			Albania
Armenia	EUROPE	29.5	25.4	606.9	367.7	39.6	41.5	10.3	11.7	25.5	27.1	15.1	20.7	70.796	78.291	331.61	Armenia	54.2	1.7	48.1	1.3	50.8	1.5	44.2	1.1			Armenia
Austria	EUROPE	25.7	16.6	177.8	119	61.3	57.7	6.3	4.2	26.2	24.3	18.5	15	78.4	83.6	4862.87	Austria									19.2	28.5	Austria
Azerbaijan	EUROPE	28.2	25.5	523.5	377.6	33.1	36	12.1	13.9	25.9	27.6	15.5	23.2	67.583	73.819	873.877	Azerbaijan	47.8	0.4	38	0.3	38.2	0.3	31.7	0.3			Azerbaijan
Belarus	EUROPE	35.9	26.3	674.4	339.6	50.5	50.8	8.5	7.9	26.6	26.2	18.1	23.6	66.6	77.6	859.489	Belarus	48.2	10.9	40.7	7.6	44.3	10	38.4	6.7			Belarus
Belgium	EUROPE	25.1	15.1	140.3	86.9	64.6	59.9	5.8	4.1	26.1	24.8	20.6	16.9	77.8	83.1	4237.73	Belgium	27.5	20.5	22.6	16.9	22.5	17.2	17.4	13.7	28.3	38.2	Belgium
Bosnia and Herzegovina	EUROPE	31.3	26.9	352.1	273.2	38.5	39.5	9.9	9	26.2	25.7	14.5	19	73.627	78.738	947.944	Bosnia and Herzegovina	48.3	30.8	40.6	24.1	38.9	25	35.9	21.1	15.8	20.4	Bosnia and Herzegovina
Bulgaria	EUROPE	34.2	24.8	498.6	331.8	50.3	49	8.4	7.1	26.4	25.2	19.5	22.7	70.9	77.9	1131.18	Bulgaria	44.3	29.8	37.5	23.1	40.6	27.2	33.6	21	18.2	23.8	Bulgaria
Croatia	EUROPE	34	24.5	291.7	193.6	49.4	49.7	8.3	6.4	26.2	24.5	20.1	22.7	73.9	80.1	1643.41	Croatia	39.5	32.7	34.9	27.6	32	26	28.9	20.8	15	17.4	Croatia
Cyprus	EUROPE	25.8	17.6	155.2	117.9	58.7	55.5	9	6.5	27.4	26.1	20	24.2	77.593	82.04	2215.66	Cyprus									28.9	40.4	Cyprus
Czech Republic	EUROPE	34.8	22.4	299.3	191.9	54.4	52.7	8.5	6.7	27.6	26.1	24.2	26.3	75.1	81.2	2057.59	Czech Republic	37.8	29.2	29.4	20.3	32	24.3	28.5	20	22.7	24.8	Czech Republic
Denmark	EUROPE	29.1	16.2	134.6	85.5	68.3	61.8	5.7	3.9	25.9	24.4	20	15.5	78.1	82.1	4688.67	Denmark	19.9	18	16.2	14.9	15.9	15.6	11.6	11.4	22.4	26.2	Denmark
Estonia	EUROPE	39.6	27.4	387.4	199.5	56	56.7	8.5	6.5	26.7	24.3	20	22.3	71.4	81.5	1555.77	Estonia	42.8	25.3	35.7	18.1	35.3	20.5	32.2	16.5	11.2	12.6	Estonia
Finland	EUROPE	27	17.3	197.3	104.1	57.5	59.3	7.5	5.4	26.4	25.4	19.8	18.3	77.7	83.7	3608.12	Finland	24.6	19.3	19.3	14.5	18.8	15.1	14.8	12.4	21.7	25.3	Finland
France	EUROPE	29.3	18	111.8	65	63.5	60.2	7.2	4.7	25.9	24.5	21.8	22.3	78.7	85.4	4285.44	France	30.6	25.8	25.5	21.5	24.9	20.8	22.3	18.1	19.1	28.5	France
Georgia	EUROPE	29.7	25.5	545.3	349.3	35.6	38	12.1	11.9	26.7	26.8	15	21.8	70.4	77.667	634.457	Georgia	58.5	5.8	47.7	3.9	52.5	5.3	43.3	3.4	20.2	21	Georgia
Germany	EUROPE	27.1	17.1	171.6	116.2	69.6	61.4	6.8	4.8	26.8	25.5	19.9	17.2	78.6	83.3	4709.59	Germany	33.1	28.5	27.6	21	30.4	26.4	25.9	20.4	18.7	23.5	Germany
Greece	EUROPE	23.6	16.6	210.2	145.2	50.1	45.9	7.5	6.1	27.3	27.2	20	22.6	78	83.4	2319.27	Greece	53.8	33.5	45.8	25.1	45	28.4	37.6	22.1	10.1	15.7	Greece
Hungary	EUROPE	36.3	24.7	383.7	229.4	55.4	54	8.7	6.3	27.3	25.2	22.1	22.8	71.6	78.7	1744.14	Hungary	33.6	26	28.9	21.7	27.8	20.7	25.2	19.4	17.2	19	Hungary
Iceland	EUROPE	28.8	16.2	118.8	87.2	72.5	67	8.1	5	26.6	25.1	22.4	20.2	81.6	84.3	3529.11	Iceland	18.6	16.3	13.1	13.1	14.2	12.7	12.4	10.7			Iceland
Ireland	EUROPE	24.7	16.8	147.5	93.5	65.5	59.5	8.3	6	27.7	26.8	23.3	22.8	78.7	83.2	3813.99	Ireland	23.6	22.9	19	19.4	23.6	22.9	19	19.4	30	40.1	Ireland
Italy	EUROPE	26.4	18.4	129.7	85.4	62.3	61.6	7.4	5.3	26.6	25.2	18.8	20.3	79.8	84.8	3304.6	Italy	28.8	19.9	26.1	18.3	27.5	19.3	24.5	18.1	28.2	38.1	Italy
Latvia	EUROPE	36.8	26.1	512.4	266.5	55.3	55.2	8.1	6.8	26.4	25.1	19.6	24.4	68.9	78.9	869.788	Latvia	50	24.4	44.4	18.3	40.3	20	38.2	17.6	18.3	25.6	Latvia
Lithuania	EUROPE	36.2	26	448.2	241.6	54.9	54	9.6	8.2	27	26	20.3	26.7	68.4	79.6	1583.97	Lithuania	39.8	22.2	34.1	14.9	32.8	17.8	26.2	13	16.1	20.6	Lithuania
Luxembourg	EUROPE	30.3	17.5	131.5	88.2	69.5	64.1	7.8	4.7	27.3	25.4	23.9	17.9	79.1	83.8	6541.35	Luxembourg	26.8	22	20.2	17.3	22.3	17.9	17	14.6	26.6	30.4	Luxembourg
Macedonia	EUROPE	32	24.7	448.3	366.1	42.4	43.7	7.9	6.9	26.1	25.2	16.5	19.9	72.802	77.372	803.003	Macedonia											Macedonia
Malta	EUROPE	26.9	17.2	184	124.8	60.7	56.9	8.3	6.3	27.3	26.8	22.6	26.9	78.6	83	2959.79	Malta	30.9	20.9	25.3	16.1	25.3	16.8	22.4	14.2	38.6	47.2	Malta
Moldova	EUROPE	33.6	28.5	622.6	429	35.2	36.9	8.1	9.3	26	27	10	16.9	64.89	72.687	501.648	Moldova	44.8	5.4	38.1	4.3	40.7	4.8	34	3.8	12.9	11.7	Moldova
Netherlands	EUROPE	25	15.7	128.8	84.9	62.5	58.2	6	4.5	25.7	24.9	19.4	16.7	79.3	83	5115.01	Netherlands	27.3	24.2	20.6	18.6	22.4	19.8	20	17.7	14	17	Netherlands
Norway	EUROPE	25.7	15.7	139.2	87.2	64.2	59.3	7.9	5.2	26.6	25.1	22.4	20.7	79.5	83.5	6116.48	Norway	24.3	23.9	17.2	17.2	18.9	18.9	14.5	15	22.9	28.8	Norway
Poland	EUROPE	34.9	24.5	333.5	192.1	59.9	53.8	8.8	7.3	26.7	25.7	21	25.1	72.7	81.1	1544.56	Poland	34	25.2	27.9	18.9	31.3	22.8	27.1	18.4	13.6	23.8	Poland
Portugal	EUROPE	28.8	20	140.3	91.5	57.2	54.3	8	5.7	26.5	25.7	17.8	18.9	77.3	83.6	2624.04	Portugal	31.9	14	26.1	10	26.2	11.3	22.2	8.6	31.4	38.5	Portugal
Romania	EUROPE	32.8	24.3	443.9	299.7	46	45.2	7.2	6.7	25.4	24.9	18.5	21.7	71	78.1	1005.04	Romania	38.5	23.1	33.4	18.6	34.1	19.8	30.4	17.7	18.9	31.8	Romania
Russian Federation	EUROPE	34.6	26.2	760.9	394.7	47.3	52.1	8.2	8.8	25.7	26.7	17.6	26.2	65	76	1653.68	Russian Federation	59.8	22.7	51.9	18.1	55	20.6	48.2	16.8	10.2	8.8	Russian Federation
Serbia	EUROPE	34.6	26.2	400.8	318.9	47.4	52	7.7	6.8	26.2	25.2	16.7	19.1	72.3	77.5	1266.62	Serbia	44.6	39.7	36.4	30.8	36.3	31.4	33.6	28.7	33.5	43.8	Serbia
Slovakia	EUROPE	34.3	23.9	394.5	241.5	52.7	51.7	8.9	7.2	27	25.6	21.8	24.9	72.5	79.9	2064.6	Slovakia	40.4	18	31.8	12.9	33.4	14.6	27.5	10.8	16.6	19.1	Slovakia
Slovenia	EUROPE	34.6	24.5	174.2	113.6	56.8	55.3	9.2	7.7	27.2	26.2	22.2	24.2	77.1	83.3	2616.85	Slovenia	23.2	18.7	20	15.4	19.3	14.8	16.8	12.9	17.4	25.1	Slovenia
Spain	EUROPE	25.7	17	121.4	75.6	58.9	52.9	8.6	6	27.2	26	21.1	23.1	79.5	85.5	2997.55	Spain	33	27.8	28.2	23.2	29.1	24.3	25	21.1	27.2	33.7	Spain
Sweden	EUROPE	27.3	16.7	162.8	105.7	56.1	47	7.3	4.9	26.4	24.8	20.4	17.2	79.9	83.6	5007.48	Sweden	21.7	22.1	10.6	13	16.6	17.1	10.6	13	24.4	33	Sweden
Switzerland	EUROPE	24.1	15	122	77.9	61.1	56.9	6.3	3.8	26.4	23.9	20.2	15.5	80.6	84.9	6173.04	Switzerland	27.7	20.6	21.5	17.6	27.1	20.1	20.8	17.5			Switzerland
Ukraine	EUROPE	34.2	26.5	707.7	427.8	43.1	44.7	7.8	7.7	26.1	25.8	15.3	21.7	66.11	76.02	636.353	Ukraine	50.6	14.3	44.2	9.9	46.9	13	42.2	9.1	11.6	12.7	Ukraine
United Kingdom	EUROPE	20.6	14.5	140.6	86.7	65.2	61.3	8.1	6.2	27.2	26.9	24.1	26.8	79.1	82.8	3322.94	United Kingdom	21.1	19.5	21.1	19.5	21.1	19.5	21.1	19.5	32.3	42.4	United Kingdom
Afghanistan	NORTH AFRICA & ASIA & OCEANIA	28.4	29	498	520.9	20.9	22.8	8.8	8.2	21.1	21.2	1.4	3.3	58.524	60.893	160.368	Afghanistan											Afghanistan
Algeria	NORTH AFRICA & ASIA & OCEANIA	28.9	28.9	434.6	359.9	37.3	41.4	13	13.5	25.1	26.7	16.6	28.7	72.068	76.693	821.339	Algeria									27.7	41.2	Algeria
Australia	NORTH AFRICA & ASIA & OCEANIA	20.9	14.1	110.6	75.6	54.8	55.3	7.3	5.4	27.3	26.6	25.6	26.3	79.9	84.3	4151.82	Australia	17.8	14.3	15.1	12.4	14.9	11.3	12.3	9.6	20.1	27.6	Australia
Bangladesh	NORTH AFRICA & ASIA & OCEANIA	25.2	26.2	178.7	152.6	24.9	26.4	8.8	8.5	20.5	20.7	1.7	4.2	69.711	72.067	85.1495	Bangladesh	42.4	0.9	38.1	0.8	29.8	0.3	24.5	0.3	10.2	43.4	Bangladesh
Brunei	NORTH AFRICA & ASIA & OCEANIA	24.2	17.4	232.8	189.8	55.1	55.8	11.2	11.1	25.5	26.5	13.4	18.4	76.456	80.139	1706.22	Brunei	29.2	3.3	23.2	2.5	23.4	2.7	18.9	1.9			Brunei
Cambodia	NORTH AFRICA & ASIA & OCEANIA	24.4	24.3	202.5	170.4	26.9	32	7.2	7.4	21.5	21.6	1.2	3.4	65.304	69.455	177.613	Cambodia	44.7	3.2	38.5	2.7	37.6	2.8	32.4	2.5	9.7	10.9	Cambodia
Egypt	NORTH AFRICA & ASIA & OCEANIA	26.2	27.1	515.9	387.7	33.9	45.3	15	18.4	27.3	30.2	17.7	34.8	68.595	72.97	542.46	Egypt	47.5	0.4	40.5	0.3	35.7	0.2	29.7	0.1	25.1	39.4	Egypt
Fiji	NORTH AFRICA & ASIA & OCEANIA	24.7	22.2	494.1	264	56.4	49.7	14.7	16.9	25.9	28.3	29.4	40.9	66.832	72.8	309.73	Fiji	40	12.7	28	8	31.8	9.8	23.2	6.8	10.7	23.2	Fiji
China	NORTH AFRICA & ASIA & OCEANIA	21.8	18.3	313.8	286.1	31.5	35.1	8.7	7.3	23.6	23.3	4.3	6.4	73.94	76.522	588.359	China	48.7	1.9	42	1.6	44.6	1.7	38.5	1.3	22.5	25.6	China
India	NORTH AFRICA & ASIA & OCEANIA	26.3	25.2	348.9	264.6	26.3	29.5	9.1	8.8	21.5	21.7	2.5	5.6	65.985	68.66	217.184	India	21.9	2.3	19.1	1.9	9.4	0.8	5.6	0.6	10.8	16.1	India
Indonesia	NORTH AFRICA & ASIA & OCEANIA	24.6	23.4	407.5	337	33.1	38.2	7.7	8.4	21.9	23	2.5	6.1	66.502	70.638	273.83	Indonesia	73.3	3.8	63.9	2.4	63	3.5	59.4	2.3	25.5	22	Indonesia
Iran	NORTH AFRICA & ASIA & OCEANIA	25.8	25.3	371	329.6	49.8	58.1	11	12.1	25	26.8	18	29.9	73.573	76.087	1143.94	Iran	22.4	1	20	0.8	15	0.6	10.8	0.4	24.1	42.9	Iran
Iraq	NORTH AFRICA & ASIA & OCEANIA	28.3	28.7	523.8	336.7	43.7	44.1	14.7	15.5	26.7	28.4	14.7	27.5	65.679	72.983	650.841	Iraq									52.8	45.8	Iraq
Israel	NORTH AFRICA & ASIA & OCEANIA	23.6	15.7	105	70.1	51.8	54.8	6.7	5.7	26	26.1	21.5	25.5	79.9	83.6	2446.06	Israel	41.5	19.8	31.9	15	34.3	16.4	30.3	13.4			Israel
Japan	NORTH AFRICA & ASIA & OCEANIA	22.8	13.9	108	58.9	58.2	55.7	8.9	5.8	23.5	21.8	2.9	2.9	79.94	86.41	3621.58	Japan	35.4	11	28.6	8.4	35.4	11	28.6	8.4	31.1	36.5	Japan
Jordan	NORTH AFRICA & ASIA & OCEANIA	26.8	24.1	358.9	293.5	47.8	49.6	13.7	14.7	27.8	29.5	20.4	36.2	72.143	75.432	834.677	Jordan	65.5	10.2	54	7.2	56.8	8.6	41.2	2.1	15.6	15.6	Jordan
Kazakhstan	NORTH AFRICA & ASIA & OCEANIA	31.1	25.5	808.1	515.2	45	45.6	12.4	12.1	26.8	27.1	18.8	23.4	64.84	74.33	943.009	Kazakhstan	45.3	9.5	30.3	5.9	42.2	8.1	27.6	5.9	20.2	21	Kazakhstan
Kuwait	NORTH AFRICA & ASIA & OCEANIA	31.1	25	243.7	233.5	56.2	55.7	18.8	17.3	29	30.4	32.5	43.2	73.379	75.388	2017.85	Kuwait									49.2	63.9	Kuwait
Kyrgyzstan	NORTH AFRICA & ASIA & OCEANIA	28.7	26.8	660.4	462.3	28.3	31.2	9.1	10.7	25.2	26.4	10.1	15.7	66.1	74.1	202.243	Kyrgyzstan	50.5	3.7	40.1	2.7	44.5	2.9	38.4	2.5	10.4	16.1	Kyrgyzstan
Laos	NORTH AFRICA & ASIA & OCEANIA	24.2	24.7	368.7	326.6	28.8	33.6	7.7	8	21.9	22.3	1.4	3.6	63.929	66.634	97.4147	Laos	58.7	10.1	50.7	8	47.5	8.2	42.7	5.3	4.7	16	Laos
Lebanon	NORTH AFRICA & ASIA & OCEANIA	25.7	21.5	267.5	160.4	41	47	11.3	9.8	27.4	27.1	23	34	77.781	82.015	1085.67	Lebanon	43.9	29.9	36	21.1	37	24.2	27.4	6.1	43.9	33.8	Lebanon
Libya	NORTH AFRICA & ASIA & OCEANIA	28	25.7	368.1	277.8	34.8	36.6	14.7	15.7	26.8	29.2	23.5	36.7	68.932	74.503	1148.51	Libya									32.8	43.3	Libya
Malaysia	NORTH AFRICA & ASIA & OCEANIA	25.9	21	324.9	268.8	50	54	10.7	9.8	24.6	25.3	7.9	13	72.156	76.804	901.818	Malaysia	44.4	1.5	36.5	1.1	36	1.2	32.4	0.9	46.7	58	Malaysia
Maldives	NORTH AFRICA & ASIA & OCEANIA	23.6	20.4	279	208	37.4	46.2	10.2	9.8	23.9	25.7	3.9	9.5	75.476	77.498	1156.97	Maldives									25.8	35.5	Maldives
Mongolia	NORTH AFRICA & ASIA & OCEANIA	34.8	28.8	723.3	483.2	37	37.4	10.2	10.2	24.9	25.8	12.2	16.5	64.474	72.96	421.368	Mongolia	48.7	5.6	41.6	4.5	39.5	4.5	36.9	4.1	19.6	23.2	Mongolia
Morocco	NORTH AFRICA & ASIA & OCEANIA	28.1	28.8	347.2	314	35.3	39	12.4	12.1	24.8	25.6	14.1	26	72.351	74.429	425.143	Morocco	43.6	1.6	35.8	0.9	36.8	1	28.4	0.5			Morocco
Myanmar	NORTH AFRICA & ASIA & OCEANIA	23.5	23.9	324.9	311.1	27.6	32.8	6.1	7.1	21.7	22.8	1	3.1	63.439	67.516	85.1463	Myanmar	33.9	7.2	27.1	5.5	27.4	5.9	16.8	3.8	8.3	11.6	Myanmar
Nepal	NORTH AFRICA & ASIA & OCEANIA	25.8	26.9	288.5	252.4	22.1	24.1	9.4	8.3	22	21.4	1.6	3.8	67.456	70.259	126.94	Nepal	37.9	12.9	27.7	9.6	32.1	10.3	26.4	8.6	4.5	3.7	Nepal
New Zealand	NORTH AFRICA & ASIA & OCEANIA	21.1	14.7	122.3	86.2	56.8	55.4	8.4	6.5	27.7	27.5	24.8	28.1	79.4	83	3727	New Zealand	18.5	16.7	16.4	14.7	17.6	15.9	15.9	14.3	35.8	43.7	New Zealand
Oman	NORTH AFRICA & ASIA & OCEANIA	28.4	26.6	275.8	209.8	48.4	50.7	13.9	15.3	26.3	26.8	23.9	34.9	74.532	78.75	1073.91	Oman	19.5	1	15.8	0.7	15.3	0.5	12.1	0.2			Oman
Pakistan	NORTH AFRICA & ASIA & OCEANIA	28.9	27	256.4	293.6	30.5	31.4	9.8	10	23	24	3.2	6.4	64.812	66.667	123.325	Pakistan	41	3.4	33.8	2.8	26	1.6	21.6	1.1	20.2	31.7	Pakistan
Philippines	NORTH AFRICA & ASIA & OCEANIA	24	20.9	463.6	305.4	39.3	46.7	6.5	7.1	22.6	23.1	2.8	5.5	64.69	71.49	274.489	Philippines	44.8	8.9	35	6.4	40.6	7.4	31.5	5.9	13.1	18.6	Philippines
Saudi Arabia	NORTH AFRICA & ASIA & OCEANIA	29.4	26.6	382.4	287.5	36.4	42.1	17.5	15.9	27.8	28.4	26.8	38.8	72.737	75.359	1920.38	Saudi Arabia	26.8	3	23.1	1.8	20.2	2.2	16.8	0.6	53.2	68.7	Saudi Arabia
Solomon Islands	NORTH AFRICA & ASIA & OCEANIA	22.1	24.3	314.6	196.9	30.1	36.5	14.4	15.8	24.5	26.3	20.1	32.2	66.15	68.931	112.978	Solomon Islands									30.2	39.9	Solomon Islands
South Korea	NORTH AFRICA & ASIA & OCEANIA	15.7	10.4	112.6	76.2	41.7	42.7	8.6	6.3	24	23.1	3.5	4.9	77.95	84.64	2245.55	South Korea	51.1	4.3	48.5	3.5	51.1	4.3	48.5	3.5	28.9	37.9	South Korea
Sri Lanka	NORTH AFRICA & ASIA & OCEANIA	22.2	20.9	345.1	209	32.9	38.3	7.8	8.8	22	23	2.3	7.3	71.05	77.237	288.004	Sri Lanka	28.8	0.4	22.2	0.3	20.1	0.2	15.3	0.1	17.3	30.3	Sri Lanka
Syria	NORTH AFRICA & ASIA & OCEANIA	26.8	26	455	299.2	38.3	42.4	11.9	13	26.8	28.6	15.5	27.5	71.879	77.684	163.249	Syria											Syria
Tajikistan	NORTH AFRICA & ASIA & OCEANIA	27	26.8	490.9	523.2	22.5	25.3	10.4	10.7	25.1	24.8	8.6	15.6	65.826	72.675	152.461	Tajikistan											Tajikistan
Thailand	NORTH AFRICA & ASIA & OCEANIA	23.4	20.4	215.8	156.9	54.6	56.1	8.6	9.1	23.2	24.4	4.1	9.1	70.788	77.52	846.92	Thailand	41.9	2.4	35.7	1.8	39.9	2.2	34.2	1.6	12.9	16.7	Thailand
Timor-Leste	NORTH AFRICA & ASIA & OCEANIA	26.1	26.9	336.6	351.7	24.1	29.1	6.9	6.5	21.1	20.7	0.9	2.5	65.524	68.592	95.8425	Timor-Leste											Timor-Leste
Tunisia	NORTH AFRICA & ASIA & OCEANIA	26.5	25.9	347.7	271.2	37.3	43.8	11.8	12.4	25.5	27.1	17.8	31.3	71.8	76.3	766.04	Tunisia									19.7	27.3	Tunisia
Turkey	NORTH AFRICA & ASIA & OCEANIA	24.4	24.7	384.2	256	38.1	41	11.8	12.6	26.7	28.2	20.4	33.4	71.5	78.393	948.702	Turkey	41.6	13.2	35.7	9.9	38.1	12	33.9	9.6	28.1	37.5	Turkey
Turkmenistan	NORTH AFRICA & ASIA & OCEANIA	28.5	26.1	820.6	618.2	33.8	35.8	12.5	12.6	25.8	25.8	14.4	20.6	61.215	69.613	248.839	Turkmenistan											Turkmenistan
United Arab Emirates	NORTH AFRICA & ASIA & OCEANIA	27.5	23.3	315.6	264.2	56.8	58.2	17.4	16.5	28.2	29.5	30.9	43.2	75.95	78.152	1993.59	United Arab Emirates									32.2	44.6	United Arab Emirates
Uzbekistan	NORTH AFRICA & ASIA & OCEANIA	27	25.5	656.7	509.5	24.2	28.9	10	10.7	25.4	25.7	10.5	16.8	64.844	71.527	323.795	Uzbekistan	25.6	1.3	20.1	1	21.3	1	16.5	0.8	13.6	24.9	Uzbekistan
Viet Nam	NORTH AFRICA & ASIA & OCEANIA	23.6	21.4	262.3	145	33.9	38.1	5.8	6.1	21	21.2	1.5	3.6	71.074	80.366	342.191	Viet Nam	47.3	1.3	38.4	1	37.4	1	28.6	0.8	22.1	25.8	Viet Nam
Yemen	NORTH AFRICA & ASIA & OCEANIA	30.1	32.3	431.1	327.1	30.7	33.6	13.7	14.2	24.8	26.2	9.8	21.8	62.019	64.701	210.641	Yemen											Yemen
Angola	SUBSAHARAN AFRICA	32.6	32.1	376.4	369.8	29.7	31.8	11.3	10	23.1	24.1	4.6	12	50.024	52.976	223.245	Angola											Angola
Benin	SUBSAHARAN AFRICA	30.9	31	367.4	371.1	18.9	21.4	9.9	12.7	22.4	23.8	3.5	12.4	57.761	60.551	83.3296	Benin	16.9	1	14.2	0.8	9.9	0.2	9	0.2	5.7	8.1	Benin
Botswana	SUBSAHARAN AFRICA	31.8	31.4	277.5	349.5	36.1	38.9	9.9	11.4	22.5	26.2	10	29	61.912	66.649	878.725	Botswana									21.7	32.6	Botswana
Burkina Faso	SUBSAHARAN AFRICA	32.6	33.1	395.6	355.6	16.3	18.8	8.2	6.6	21.9	21.8	2.8	7.8	56.612	59.21	82.4036	Burkina Faso	34.1	4.8	28.7	4.3	24.7	0.7	15.1	0.6	15.9	20.9	Burkina Faso
Cabo Verde	SUBSAHARAN AFRICA	34.3	30.6	330.4	195.2	23.7	24.8	9.8	8.6	23.6	25	6.9	15.1	71.077	74.667	288.161	Cabo Verde	20.8	3.7	16.6	2.8	14.9	1.1	11.4	0.9	13.5	25.7	Cabo Verde
Cameroon	SUBSAHARAN AFRICA	29.4	28.2	283.9	284.8	19.5	24	8.5	7.9	23.6	24.7	4.9	14.7	53.508	55.721	117.768	Cameroon	36.9	0.9	26.8	0.6	22.6	0.4	19.5	0.2	22.8	38.7	Cameroon
Central African Republic	SUBSAHARAN AFRICA	32.5	32.4	249.8	237.8	20.3	23.7	7.7	7.3	21.5	22.8	1.9	6.8	47.457	50.836	33.6553	Central African Republic									10.8	13.3	Central African Republic
Congo	SUBSAHARAN AFRICA	31.4	29.1	337.6	329.3	26.7	30.7	8.9	8.3	22.2	23.7	5.2	13.8	59.52	62.398	230.645	Congo	35.5	1.7	25	1.1	23.3	0.8	19.2	0.5	21.2	29.6	Congo
Côte d'Ivoire	SUBSAHARAN AFRICA	30.8	29.1	332.3	338.8	19.2	22.8	7.8	6.6	23	23.8	4	12	50.077	51.689	172.158	Côte d'Ivoire									18	27.1	Côte d'Ivoire
Djibouti	SUBSAHARAN AFRICA	32.6	28.9	298.5	256.9	36.8	36.3	9.2	8.2	22.6	23.7	4.9	11.7	59.755	62.914	257.63	Djibouti											Djibouti
Ethiopia	SUBSAHARAN AFRICA	29.7	31.2	183.9	141.1	21	21.5	6.8	6.5	20	20.7	1.2	5.3	61.015	64.661	72.469	Ethiopia	8.9	0.5	6.3	0.3	7.5	0.2	5.7	0.1	14	23.9	Ethiopia
Gabon	SUBSAHARAN AFRICA	32.8	27.8	248.5	234.4	40.5	44.2	12	10.4	24.3	25.9	10.9	20.6	62.97	63.607	556.461	Gabon									17.7	34.4	Gabon
Gambia	SUBSAHARAN AFRICA	32.7	30.7	306.2	292	18.1	22.5	9	8.6	22.5	24.5	4.7	13.2	58.484	61.137	97.8794	Gambia									16.9	26.1	Gambia
Ghana	SUBSAHARAN AFRICA	30.2	28.1	320	350	15.6	20.6	7.9	7.3	23.1	24.6	4.2	16	60.058	61.942	178.425	Ghana	12.4	0.5	9.8	0.4	9	0.1	8	0.1	13.1	18	Ghana
Guinea	SUBSAHARAN AFRICA	30.4	31.5	288.1	332	16.4	20.6	7.1	6.5	22	23	2.8	8.8	57.123	58.178	65.7197	Guinea									7.1	12.7	Guinea
Guinea-Bissau	SUBSAHARAN AFRICA	32.4	32.3	355.1	379.7	15.4	18.4	7.6	7.3	22	23.5	3	9.2	52.804	56.288	91.5207	Guinea-Bissau											Guinea-Bissau
Chad	SUBSAHARAN AFRICA	33.1	33.4	310.2	300.4	16.3	19.2	9.8	7.8	21.9	22.2	3.3	10.8	49.797	51.815	59.9014	Chad									21.7	27.4	Chad
Kenya	SUBSAHARAN AFRICA	28.7	27.4	219.6	191.2	26.3	27.2	6.5	7.3	21.7	23.6	2.4	8.9	58.824	61.794	149.218	Kenya	25.1	2.2	18.5	1.2	20	0.6	17.1	0.6	17.3	21.1	Kenya
Lesotho	SUBSAHARAN AFRICA	27.9	31.6	301.9	309.9	21.1	24.1	8.1	11.3	22.4	26.8	3.4	21.8	48.636	49.046	270.423	Lesotho	51.7	0.4	40.4	0.3	37.3	0.2	30.3	0.2	7.5	7	Lesotho
Liberia	SUBSAHARAN AFRICA	31	30.6	236.6	256.4	14.1	17.8	7.2	6.9	23.1	24.3	2.3	8.6	59.279	61.176	81.1341	Liberia	25.9	2.6	20.5	1.9	19.3	0.7	14.5	0.6	24.5	30.6	Liberia
Madagascar	SUBSAHARAN AFRICA	29.8	29.1	349.4	354.6	23.8	24.8	6.9	6.1	20.9	21	1.9	7	62.793	65.773	48.3483	Madagascar									13.7	22.2	Madagascar
Malawi	SUBSAHARAN AFRICA	28.7	29.3	296.4	366.7	23.1	24.9	7.3	7.2	22	22.9	1.4	7	59.042	61.109	91.989	Malawi	26.3	6.4	20.1	3.8	22.4	1.2	18.1	1.2	5.6	9.4	Malawi
Mali	SUBSAHARAN AFRICA	32.7	33.5	334.9	447.6	18	20.3	8.3	7.1	22.3	22.6	3.1	8.4	57.315	56.864	101.176	Mali	33.9	3.3	27.5	2.5	25.5	1.1	16.5	0.6	18.2	29.1	Mali
Mauritania	SUBSAHARAN AFRICA	35.5	33.2	252.1	267.7	21.3	22.9	8.6	9.5	23	26	4.9	11.6	61.107	64.086	119.343	Mauritania	40.6	3.9	35.1	2.9	28.7	1	16.5	0.9	38	52.1	Mauritania
Mauritius	SUBSAHARAN AFRICA	28.7	24	269.3	157.3	47.8	46	11.4	10.3	24.7	25.9	9.3	20.7	70.4	77.5	804.587	Mauritius	41	3.4	31	1.6	36.8	3	28.4	1.2	23.1	27.3	Mauritius
Mozambique	SUBSAHARAN AFRICA	30.2	30.4	224.8	203.6	26.1	25.9	7.4	7.2	21.4	22.7	1.5	7.1	52.677	55.824	56.5569	Mozambique	32.7	6.1	23.7	3.9	24.8	1.8	20.3	1.5	5.5	6.2	Mozambique
Namibia	SUBSAHARAN AFRICA	31.1	30.9	279.6	318.3	31.1	34.5	9	9.7	22.5	25.3	7.3	25.7	61.207	66.689	743.486	Namibia	37	11.7	29.8	8.9	25.7	6.5	20.4	4.9	26.4	37.1	Namibia
Niger	SUBSAHARAN AFRICA	32.8	34.8	285.3	344.5	14.2	16.5	6.8	6.5	21.1	21.9	1.7	5.8	59.354	60.827	51.9515	Niger	16.7	0.2	11.8	0.2	12.6	0	11.3	0	23.3	27	Niger
Nigeria	SUBSAHARAN AFRICA	28.9	28.2	258.9	271.8	14	19.4	7.4	7	22.4	23.7	4.6	13.4	51.805	52.42	178.31	Nigeria	16.4	1.2	13	0.9	10.9	0.3	9.2	0.2	20.6	24	Nigeria
Rwanda	SUBSAHARAN AFRICA	28.2	29.3	272.3	252.1	20.7	24.6	5.4	5.7	21.1	22.3	1	5.2	59.494	66.27	115.931	Rwanda		5.6		4.1		1.1		1	12	18.6	Rwanda
Senegal	SUBSAHARAN AFRICA	32.1	31.3	197.1	198.2	19.9	22.9	8.5	8.3	21.6	23.8	4.2	12.7	63.574	67.151	95.0124	Senegal	22.4	0.8	19.2	0.6	15.9	0.2	14.1	0.2	21	29	Senegal
Sierra Leone	SUBSAHARAN AFRICA	31.7	32.2	386.9	485.3	14.3	17.6	7.4	7.2	21.8	23.3	2.6	9.8	49.193	50.333	179.023	Sierra Leone	56.4	12.9	43.4	8.5	43	4.5	38.5	3.2	10.5	17.9	Sierra Leone
South Africa	SUBSAHARAN AFRICA	30.4	28.6	354.2	259.8	31.6	38	11	12.7	25	28.7	12.9	34.7	54.171	58.122	1097.43	South Africa	31.9	7	27.1	6	24	3.6	20.3	3.9	42.2	51.6	South Africa
Sudan	SUBSAHARAN AFRICA	32.1	29.4	231.5	219.2	33.1	32.6	8.8	9.9	23.4	26.3	3.4	9.2	61.34	64.399	262.379	Sudan											Sudan
Swaziland	SUBSAHARAN AFRICA	29.1	30.1	248.2	330.8	29.2	32.7	9.4	12.6	23.8	28.4	6.2	25.2	49.396	48.278	526.636	Swaziland	18.4	2.3	12.7	1.7	16.5	1.3	8.9	0.9	32.8	40.8	Swaziland
Tanzania	SUBSAHARAN AFRICA	28.8	28.8	214.7	191.1	21.6	25.5	7	7.3	22	23.5	2.2	9	62.197	64.911	127.112	Tanzania	28.8	3.9	21.4	2.4	22.1	0.8	19.2	0.8	6.1	7.6	Tanzania
Togo	SUBSAHARAN AFRICA	31.3	31.3	295.1	315.3	15.2	18.7	8	7.6	22.2	23.6	2.6	10.2	57.888	59.253	67.3149	Togo									9.9	11	Togo
Uganda	SUBSAHARAN AFRICA	28	27.8	276.7	250.7	20	24	5.1	5.6	20.8	22.6	1.2	6.3	55.648	58.625	133.574	Uganda	17.5	3.1	11.5	1.8	15	0.9	9.9	0.8			Uganda
Zambia	SUBSAHARAN AFRICA	30	28.1	299.4	245.8	26.5	28.5	7.3	7.9	21.3	23.4	2.8	11.4	56.896	59.904	175.093	Zambia	27.1	4.7	17.8	3.2	23.9	1.2	15.4	1	17.3	23.7	Zambia
Zimbabwe	SUBSAHARAN AFRICA	28.7	30.9	186.7	202.7	21.8	25.3	5.8	7.5	21.7	24.8	2.2	17.1	52.646	54.69	112.218	Zimbabwe									18.7	26.1	Zimbabwe
MEAN		28.0684	24.043	307.966	241.741	38.5354	40.462	9.11772	8.82848	24.8487	25.4658	12.9222	19.5968	68.2206	73.0167	1254.93	MEAN	34.1313	11.4205	27.3104	8.65043	28.3009	9.25556	23.0513	7.23333	21.5496	28.9764	MEAN

## Sheet: 4-Regression - Raised bl press
	RAISED BLOOD PRESSURE (Women)
	OPTIMAL MODELS OF PENALIZED REGRESSION ANALYSES COMPUTED VIA THE BOOTSTRAPPING METHOD (total sample of 153 countries).
	Ridge regression	ridge	ridge		LASSO regression	lasso	lasso		Elastic net regression	elastic	elastic
		optimal	optimal			optimal	optimal			optimal	optimal
		bootstrap	bootstrap			bootstrap	bootstrap			bootstrap	bootstrap
	Variables	beta	absolute		Variables	beta	absolute		Variables	beta	absolute
	EGGS TOTAL	-0.108	0.108		FRUITS TOTAL	-0.12	0.12		FRUITS TOTAL	-0.134	0.134		Ridge Model (Optimal via bootstrapping)
	POULTRY	-0.1	0.1		EGGS TOTAL	-0.176	0.176		EGGS TOTAL	-0.173	0.173		Model	Penalty	Regularization "R Square" (1-Error)	Standardized Sum of Coefficients	Apparent Prediction Error	Expected Prediction Error
	FRUITS TOTAL	-0.093	0.093		POULTRY	-0.134	0.134		POULTRY	-0.131	0.131							Estimate	Std. Error	N
	ORANGES & MANDARINS	-0.087	0.087		FISH & SEAFOOD	-0.13	0.13		FISH & SEAFOOD	-0.121	0.121		33	0.64	0.877	0.003	0.123	0.245	0.043	152
	OILCROPS	-0.083	0.083		Raised cholesterol (Women)	-0.115	0.115		ORANGES & MANDARINS	-0.113	0.113
	FISH & SEAFOOD	-0.081	0.081		Health expenditure per capita (2012)	-0.111	0.111		Raised cholesterol (Women)	-0.111	0.111
	% ALCOHOLIC BEVERAGES ENERGY	0.076	0.076		ORANGES & MANDARINS	-0.093	0.093		OILCROPS	-0.092	0.092		LASSO Model (Optimal via bootstrapping)
	APPLES	-0.075	0.075		CEREALS TOTAL	0.084	0.084		CEREALS TOTAL	0.088	0.088		Model	Penalty	Regularization "R Square" (1-Error)	Number of Selected Predictors	Standardized Sum of Coefficients	Apparent Prediction Error	Expected Prediction Error
	VEGETABLES	-0.069	0.069		MEAT FAT	-0.043	0.043		Health expenditure per capita (2012)	-0.077	0.077								Estimate	Std. Error	N
	DISTILLED BEVERAGES	-0.068	0.068		OILCROPS	-0.036	0.036		MEAT FAT	-0.072	0.072		11	0.2	0.762	18	0.028	0.238	0.39	0.059	153
	CHEESE	-0.067	0.067		PLANT PROTEIN	0.027	0.027		RICE	-0.067	0.067
	CEREALS TOTAL	0.066	0.066		PORK	-0.018	0.018		ALCOHOLIC BEVERAGES TOTAL	-0.059	0.059
	Health expenditure per capita (2012)	-0.065	0.065		CHEESE	-0.012	0.012		APPLES	-0.053	0.053		Elastic Net Model (Optimal via bootstrapping)
	ALCOHOLIC BEVERAGES TOTAL	-0.061	0.061		RICE	-0.011	0.011		TOTAL FAT & ANIMAL PROTEIN	-0.05	0.05		Model	Ridge Penalty	Lasso Penalty	Regularization "R Square" (1-Error)	Number of Selected Predictors	Standardized Sum of Coefficients	Apparent Prediction Error	Expected Prediction Error
	BEER	-0.058	0.058		BEER	-0.007	0.007		STARCHY ROOTS	0.047	0.047									Estimate	Std. Error	N
	BEEF MEAT	-0.058	0.058		STARCHY ROOTS	0.006	0.006		% CC energy & SRC energy	0.045	0.045		159	0.3	0.1	0.822	35	0.309	0.178	0.306	0.046	153
	SUNFLOWER OIL	0.055	0.055		ALCOHOLIC BEVERAGES TOTAL	-0.006	0.006		MEAT TOTAL	-0.044	0.044
	MEAT TOTAL	-0.053	0.053		% CC energy & SRC energy	0.001	0.001		SUNFLOWER OIL	0.042	0.042
	Mean BMI (Women)	0.05	0.05		APPLES	0	0		WHEAT	0.041	0.041
	COFFEE	-0.049	0.049		GRAPES	0	0		PLANT PROTEIN	0.039	0.039
	MEAT PROTEIN	-0.049	0.049		DISTILLED BEVERAGES	0	0		BEEF MEAT	-0.039	0.039
	Raised cholesterol (Women)	-0.049	0.049		FERMENTED BEVERAGES	0	0		CHEESE	-0.039	0.039
	MEAT FAT	-0.049	0.049		WINE	0	0		ANIMAL FAT	-0.038	0.038
	Obesity (Women)	0.047	0.047		COFFEE	0	0		BEER	-0.036	0.036
	WHEAT	0.046	0.046		REFINED SUGAR & SWEETENERS TOTAL	0	0		FERMENTED BEVERAGES	0.036	0.036
	TREENUTS	-0.044	0.044		REFINED SUGAR	0	0		DISTILLED BEVERAGES	0.035	0.035
	RICE	-0.043	0.043		VEGETABLES	0	0		MUTTON & GOAT MEAT	0.033	0.033
	STARCHY ROOTS	0.041	0.041		TOMATOES	0	0		VEGETABLES	-0.03	0.03
	PLANT PROTEIN	0.041	0.041		LEGUMES	0	0		REFINED SUGAR & SWEETENERS TOTAL	-0.027	0.027
	DAIRY FAT	-0.041	0.041		LEGUMES incl. SOYBEANS	0	0		COFFEE	-0.02	0.02
	% PLANT FOOD ENERGY	-0.039	0.039		MAIZE	0	0		POTATOES	0.02	0.02
	FERMENTED BEVERAGES	0.037	0.037		WHEAT	0	0		Mean BMI (Women)	0.019	0.019
	FRESHWATER FISH	-0.037	0.037		POTATOES	0	0		TREENUTS	-0.012	0.012
	POTATOES	0.037	0.037		PLANT OILS	0	0		FRESHWATER FISH	-0.012	0.012
	LEGUMES incl. SOYBEANS	-0.035	0.035		SUNFLOWER OIL	0	0		OFFALS	0.007	0.007
	PORK	-0.033	0.033		TREENUTS	0	0		GRAPES	0	0
	OFFALS	0.032	0.032		PLANT FAT	0	0		WINE	0	0
	% CC energy	0.032	0.032		% CC energy	0	0		REFINED SUGAR	0	0
	LEGUMES	0.03	0.03		% SRC energy	0	0		TOMATOES	0	0
	DAIRY TOTAL	-0.03	0.03		% CA energy	0	0		LEGUMES	0	0
	MILK	0.029	0.029		% ALCOHOLIC BEVERAGES ENERGY	0	0		LEGUMES incl. SOYBEANS	0	0
	TOTAL FAT & TOTAL PROTEIN	0.029	0.029		% PLANT FOOD ENERGY	0	0		MAIZE	0	0
	LARD	0.028	0.028		PELAGIC MARINE FISH	0	0		PLANT OILS	0	0
	GRAPES	0.028	0.028		FRESHWATER FISH	0	0		PLANT FAT	0	0
	MUTTON & GOAT MEAT	0.028	0.028		MEAT TOTAL	0	0		% CC energy	0	0
	% SRC energy	0.027	0.027		MUTTON & GOAT MEAT	0	0		% SRC energy	0	0
	REFINED SUGAR	-0.027	0.027		MEAT PROTEIN	0	0		% CA energy	0	0
	% CC energy & SRC energy	0.024	0.024		DAIRY TOTAL	0	0		% ALCOHOLIC BEVERAGES ENERGY	0	0
	PLANT OILS	0.022	0.022		MILK	0	0		% PLANT FOOD ENERGY	0	0
	DAIRY PROTEIN	0.019	0.019		DAIRY FAT	0	0		PELAGIC MARINE FISH	0	0
	PLANT FAT	-0.017	0.017		DAIRY PROTEIN	0	0		PORK	0	0
	WINE	-0.016	0.016		LARD	0	0		MEAT PROTEIN	0	0
	MAIZE	-0.014	0.014		OFFALS	0	0		DAIRY TOTAL	0	0
	PELAGIC MARINE FISH	0.013	0.013		ANIMAL FAT	0	0		MILK	0	0
	TOTAL ENERGY	0.013	0.013		ANIMAL PROTEIN	0	0		DAIRY FAT	0	0
	TOTAL FAT & ANIMAL PROTEIN	-0.012	0.012		ANIMAL FAT & ANIMAL PROTEIN	0	0		DAIRY PROTEIN	0	0
	TOTAL FAT	0.01	0.01		TOTAL FAT	0	0		LARD	0	0
	% CA energy	0.01	0.01		TOTAL PROTEIN	0	0		ANIMAL PROTEIN	0	0
	REFINED SUGAR & SWEETENERS TOTAL	-0.009	0.009		TOTAL FAT & ANIMAL PROTEIN	0	0		ANIMAL FAT & ANIMAL PROTEIN	0	0
	ANIMAL FAT & ANIMAL PROTEIN	-0.008	0.008		TOTAL FAT & TOTAL PROTEIN	0	0		TOTAL FAT	0	0
	TOTAL PROTEIN	-0.007	0.007		TOTAL ENERGY	0	0		TOTAL PROTEIN	0	0
	ANIMAL FAT	0.006	0.006		Mean BMI (Women)	0	0		TOTAL FAT & TOTAL PROTEIN	0	0
	ANIMAL PROTEIN	0.001	0.001		Obesity (Women)	0	0		TOTAL ENERGY	0	0
	TOMATOES	0	0		BEEF MEAT	0	0		Obesity (Women)	0	0
	OPTIMAL MODELS OF PENALIZED REGRESSION ANALYSES COMPUTED VIA THE BOOTSTRAPPING METHOD (92 countries with health expenditure above 500 USD per capita).
	Ridge regression	ridge	ridge		LASSO regression	lasso	lasso		Elastic net regression	elastic	elastic
		optimal	optimal			optimal	optimal			optimal	optimal
		bootstrap	bootstrap			bootstrap	bootstrap			bootstrap	bootstrap
	Variables	beta	absolute		Variables	beta	absolute		Variables	beta	absolute
	ORANGES & MANDARINS	-0.118	0.118		ORANGES & MANDARINS	-0.303	0.303		ORANGES & MANDARINS	-0.192	0.192		Ridge Model (Optimal via bootstrapping)
	SUNFLOWER OIL	0.096	0.096		Health expenditure (2012)	-0.183	0.183		Health expenditure (2012)	-0.176	0.176		Model	Penalty	Regularization "R Square" (1-Error)	Standardized Sum of Coefficients	Apparent Prediction Error	Expected Prediction Error
	EGGS TOTAL	-0.085	0.085		Mean BMI (Women)	0.151	0.151		Mean BMI (Women)	0.142	0.142							Estimate	Std. Error	N
	Mean BMI (Women)	0.085	0.085		SUNFLOWER OIL	0.132	0.132		FISH & SEAFOOD	-0.132	0.132		37	0.72	0.885	0.005	0.115	0.356	0.091	85
	FISH & SEAFOOD	-0.083	0.083		EGGS TOTAL	-0.107	0.107		SUNFLOWER OIL	0.109	0.109
	Health expenditure (2012)	-0.076	0.076		FISH & SEAFOOD	-0.087	0.087		TOTAL FAT & ANIMAL PROTEIN	-0.069	0.069
	RICE	-0.074	0.074		PLANT PROTEIN	0.085	0.085		PLANT OILS	-0.064	0.064		LASSO Model (Optimal via bootstrapping)
	LARD	-0.07	0.07		LARD	-0.085	0.085		% CC energy & % SRC energy	0.062	0.062		Model	Penalty	Regularization "R Square" (1-Error)	Number of Selected Predictors	Standardized Sum of Coefficients	Apparent Prediction Error	Expected Prediction Error
	PLANT OILS	-0.063	0.063		PLANT OILS	-0.081	0.081		BEEF MEAT	-0.061	0.061								Estimate	Std. Error	N
	BEEF MEAT	-0.063	0.063		POTATOES	0.05	0.05		% CA energy	0.055	0.055		9	0.16	0.82	17	0.04	0.18	0.529	0.16	90
	DISTILLED BEVERAGES	0.058	0.058		CEREALS TOTAL	0.047	0.047		MEAT TOTAL	-0.053	0.053
	PLANT PROTEIN	0.058	0.058		RICE	-0.046	0.046		FRUITS TOTAL	-0.052	0.052
	% ALCOHOLIC BEVERAGES ENERGY	-0.057	0.057		MEAT TOTAL	-0.043	0.043		LARD	-0.052	0.052		Elastic Net Model (Optimal via bootstrapping)
	VEGETABLES	-0.056	0.056		STARCHY ROOTS	0.033	0.033		EGGS TOTAL	-0.049	0.049		Model	Ridge Penalty	Lasso Penalty	Regularization "R Square" (1-Error)	Number of Selected Predictors	Standardized Sum of Coefficients	Apparent Prediction Error	Expected Prediction Error
	TOTAL FAT & ANIMAL PROTEIN	-0.056	0.056		MEAT PROTEIN	-0.031	0.031		CEREALS TOTAL	0.043	0.043									Estimate	Std. Error	N
	FRUITS TOTAL	-0.055	0.055		DISTILLED BEVERAGES	0.023	0.023		PLANT PROTEIN	0.037	0.037		165	0.3	0.22	0.789	20	0.235	0.211	0.422	0.101	90
	% CC energy & % SRC energy	-0.054	0.054		BEEF MEAT	-0.022	0.022		MEAT PROTEIN	-0.035	0.035
	POULTRY	-0.053	0.053		FRUITS TOTAL	0	0		STARCHY ROOTS	0.032	0.032
	GRAPES	-0.052	0.052		APPLES	0	0		CHEESE	-0.03	0.03
	POTATOES	0.052	0.052		GRAPES	0	0		RICE	-0.026	0.026
	DAIRY FAT	0.048	0.048		ALCOHOLIC BEVERAGES TOTAL	0	0		APPLES	0	0
	CEREALS TOTAL	0.047	0.047		BEER	0	0		GRAPES	0	0
	REFINED SUGAR	-0.046	0.046		FERMENTED BEVERAGES	0	0		ALCOHOLIC BEVERAGES TOTAL	0	0
	WHEAT	0.045	0.045		WINE	0	0		BEER	0	0
	APPLES	0.044	0.044		COFFEE	0	0		DISTILLED BEVERAGES	0	0
	TOTAL ENERGY	0.044	0.044		REF. SUGAR & SWEETENERS TOTAL	0	0		FERMENTED BEVERAGES	0	0
	STARCHY ROOTS	0.043	0.043		REFINED SUGAR	0	0		WINE	0	0
	REF. SUGAR & SWEETENERS TOTAL	-0.042	0.042		VEGETABLES	0	0		COFFEE	0	0
	PLANT FAT	-0.042	0.042		TOMATOES	0	0		REF. SUGAR & SWEETENERS TOTAL	0	0
	% SRC energy	0.042	0.042		LEGUMES	0	0		REFINED SUGAR	0	0
	OILCROPS	0.038	0.038		LEGUMES incl. SOYBEANS	0	0		VEGETABLES	0	0
	MEAT FAT	-0.038	0.038		MAIZE	0	0		TOMATOES	0	0
	MEAT PROTEIN	-0.038	0.038		WHEAT	0	0		LEGUMES	0	0
	BEER	-0.037	0.037		OILCROPS	0	0		LEGUMES incl. SOYBEANS	0	0
	MEAT TOTAL	-0.036	0.036		TREENUTS	0	0		MAIZE	0	0
	OFFALS	0.036	0.036		PLANT FAT	0	0		WHEAT	0	0
	PELAGIC MARINE FISH	0.035	0.035		% CC energy	0	0		POTATOES	0	0
	MILK	-0.035	0.035		% SRC energy	0	0		OILCROPS	0	0
	Raised cholesterol (Women)	-0.035	0.035		% CC energy & % SRC energy	0	0		TREENUTS	0	0
	CHEESE	-0.034	0.034		% CA energy	0	0		PLANT FAT	0	0
	FRESHWATER FISH	-0.033	0.033		% ALCOHOLIC BEVERAGES ENERGY	0	0		% CC energy	0	0
	PORK	0.033	0.033		% PLANT FOOD ENERGY	0	0		% SRC energy	0	0
	% CC energy	0.029	0.029		PELAGIC MARINE FISH	0	0		% ALCOHOLIC BEVERAGES ENERGY	0	0
	ANIMAL FAT & ANIMAL PROTEIN	-0.029	0.029		FRESHWATER FISH	0	0		% PLANT FOOD ENERGY	0	0
	TOTAL FAT	0.029	0.029		PORK	0	0		PELAGIC MARINE FISH	0	0
	LEGUMES incl. SOYBEANS	-0.028	0.028		POULTRY	0	0		FRESHWATER FISH	0	0
	ALCOHOLIC BEVERAGES TOTAL	-0.027	0.027		MUTTON & GOAT MEAT	0	0		PORK	0	0
	ANIMAL PROTEIN	-0.027	0.027		MEAT FAT	0	0		POULTRY	0	0
	TOTAL PROTEIN	-0.025	0.025		DAIRY TOTAL	0	0		MUTTON & GOAT MEAT	0	0
	TOTAL FAT & TOTAL PROTEIN	0.025	0.025		CHEESE	0	0		MEAT FAT	0	0
	MUTTON & GOAT MEAT	-0.024	0.024		MILK	0	0		DAIRY TOTAL	0	0
	LEGUMES	0.023	0.023		DAIRY FAT	0	0		MILK	0	0
	TOMATOES	0.022	0.022		DAIRY PROTEIN	0	0		DAIRY FAT	0	0
	% PLANT FOOD ENERGY	0.022	0.022		OFFALS	0	0		DAIRY PROTEIN	0	0
	WINE	-0.021	0.021		ANIMAL FAT	0	0		OFFALS	0	0
	Obesity (Women)	0.021	0.021		ANIMAL PROTEIN	0	0		ANIMAL FAT	0	0
	FERMENTED BEVERAGES	-0.02	0.02		ANIMAL FAT & ANIMAL PROTEIN	0	0		ANIMAL PROTEIN	0	0
	% CA energy	-0.02	0.02		TOTAL FAT	0	0		ANIMAL FAT & ANIMAL PROTEIN	0	0
	DAIRY TOTAL	0.02	0.02		TOTAL PROTEIN	0	0		TOTAL FAT	0	0
	MAIZE	0.018	0.018		TOTAL FAT & ANIMAL PROTEIN	0	0		TOTAL PROTEIN	0	0
	ANIMAL FAT	-0.017	0.017		TOTAL FAT & TOTAL PROTEIN	0	0		TOTAL FAT & TOTAL PROTEIN	0	0
	TREENUTS	-0.015	0.015		TOTAL ENERGY	0	0		TOTAL ENERGY	0	0
	COFFEE	-0.01	0.01		Raised cholesterol (Women)	0	0		Raised cholesterol (Women)	0	0
	DAIRY PROTEIN	-0.008	0.008		Obesity (Women)	0	0		Obesity (Women)	0	0

## Sheet: 5-Regression - CVD mortality
	CVD MORTALITY (Women)
	OPTIMAL MODELS OF PENALIZED REGRESSION ANALYSES COMPUTED VIA THE BOOTSTRAPPING METHOD (total sample of 153 countries).
	Ridge regression	ridge	ridge		LASSO regression	lasso	lasso		Elastic net regression	elastic	elastic
		optimal	optimal			optimal	optimal			optimal	optimal
		bootstrap	bootstrap			bootstrap	bootstrap			bootstrap	bootstrap
	Variables	beta	absolute		Variables	beta	absolute		Variables	beta	absolute
	SUNFLOWER OIL	0.105	0.105		Health expenditure per capita (2012)	-0.314	0.314		Health expenditure per capita (2012)	-0.163	0.163		Ridge Model (Optimal via bootstrapping)
	WHEAT	0.071	0.071		% CC energy & SRC energy	0.137	0.137		WHEAT	0.135	0.135		Model	Penalty	Regularization "R Square" (1-Error)	Standardized Sum of Coefficients	Apparent Prediction Error	Expected Prediction Error
	% SRC energy	0.066	0.066		WHEAT	0.134	0.134		SUNFLOWER OIL	0.102	0.102							Estimate	Std. Error	N
	FRUITS TOTAL	-0.065	0.065		SUNFLOWER OIL	0.092	0.092		TOTAL FAT & ANIMAL PROTEIN	-0.102	0.102		33	0.64	0.892	0.008	0.108	0.22	0.042	151
	Health expenditure per capita (2012)	-0.065	0.065		BEEF MEAT	-0.09	0.09		BEEF MEAT	-0.086	0.086
	LEGUMES incl. SOYBEANS	-0.06	0.06		% SRC energy	0.086	0.086		REFINED SUGAR & SWEETENERS TOTAL	-0.084	0.084
	REFINED SUGAR	-0.059	0.059		% CC energy	0.064	0.064		% SRC energy	0.078	0.078		LASSO Model (Optimal via bootstrapping)
	LEGUMES	-0.059	0.059		REFINED SUGAR	-0.061	0.061		% CC energy & SRC energy	0.078	0.078		Model	Penalty	Regularization "R Square" (1-Error)	Number of Selected Predictors	Standardized Sum of Coefficients	Apparent Prediction Error	Expected Prediction Error
	BEEF MEAT	-0.055	0.055		LEGUMES incl. SOYBEANS	-0.04	0.04		ORANGES & MANDARINS	-0.071	0.071								Estimate	Std. Error	N
	PELAGIC MARINE FISH	-0.054	0.054		MUTTON & GOAT MEAT	0.04	0.04		% CA energy	0.071	0.071		10	0.18	0.828	15	0.047	0.172	0.249	0.039	151
	MUTTON & GOAT MEAT	0.054	0.054		Raised cholesterol (Women)	-0.036	0.036		Raised cholesterol (Women)	-0.059	0.059
	PLANT PROTEIN	0.053	0.053		WINE	-0.031	0.031		MUTTON & GOAT MEAT	0.054	0.054
	ORANGES & MANDARINS	-0.052	0.052		FISH & SEAFOOD	-0.028	0.028		% CC energy	0.051	0.051		Elastic Net Model (Optimal via bootstrapping)
	MAIZE	-0.05	0.05		TOTAL PROTEIN	-0.028	0.028		FRUITS TOTAL	-0.048	0.048		Model	Ridge Penalty	Lasso Penalty	Regularization "R Square" (1-Error)	Number of Selected Predictors	Standardized Sum of Coefficients	Apparent Prediction Error	Expected Prediction Error
	ANIMAL PROTEIN	-0.048	0.048		PELAGIC MARINE FISH	-0.027	0.027		ALCOHOLIC BEVERAGES TOTAL	-0.047	0.047									Estimate	Std. Error	N
	FISH & SEAFOOD	-0.047	0.047		BEER	-0.024	0.024		FISH & SEAFOOD	-0.046	0.046		58	0.1	0.12	0.877	29	0.242	0.123	0.226	0.039	152
	TOTAL FAT & ANIMAL PROTEIN	-0.047	0.047		LEGUMES	-0.019	0.019		LEGUMES	-0.044	0.044
	Raised cholesterol (Women)	-0.046	0.046		ANIMAL PROTEIN	-0.018	0.018		POULTRY	-0.044	0.044
	REFINED SUGAR & SWEETENERS TOTAL	-0.045	0.045		ALCOHOLIC BEVERAGES TOTAL	-0.014	0.014		BEER	-0.041	0.041
	DISTILLED BEVERAGES	-0.044	0.044		Obesity (Women)	0.013	0.013		LEGUMES incl. SOYBEANS	-0.041	0.041
	POTATOES	0.044	0.044		% CA energy	0.012	0.012		COFFEE	-0.037	0.037
	% CA energy	0.044	0.044		FRUITS TOTAL	0	0		TOTAL PROTEIN	-0.028	0.028
	% CC energy & SRC energy	-0.042	0.042		APPLES	0	0		PELAGIC MARINE FISH	-0.023	0.023
	POULTRY	-0.042	0.042		GRAPES	0	0		TOTAL FAT & TOTAL PROTEIN	-0.023	0.023
	ALCOHOLIC BEVERAGES TOTAL	-0.041	0.041		ORANGES & MANDARINS	0	0		WINE	-0.019	0.019
	EGGS TOTAL	-0.041	0.041		DISTILLED BEVERAGES	0	0		ANIMAL FAT & ANIMAL PROTEIN	-0.019	0.019
	ANIMAL FAT	-0.041	0.041		FERMENTED BEVERAGES	0	0		ANIMAL PROTEIN	-0.018	0.018
	PLANT OILS	-0.04	0.04		COFFEE	0	0		PLANT PROTEIN	0.017	0.017
	TOTAL PROTEIN	-0.039	0.039		REFINED SUGAR & SWEETENERS TOTAL	0	0		MAIZE	-0.013	0.013
	COFFEE	-0.037	0.037		VEGETABLES	0	0		PORK	-0.013	0.013
	PORK	-0.037	0.037		TOMATOES	0	0		DISTILLED BEVERAGES	0.011	0.011
	MEAT FAT	-0.037	0.037		CEREALS TOTAL	0	0		Obesity (Women)	0.011	0.011
	TOMATOES	0.035	0.035		MAIZE	0	0		CHEESE	-0.008	0.008
	TOTAL FAT	0.035	0.035		RICE	0	0		CEREALS TOTAL	0.005	0.005
	TOTAL FAT & TOTAL PROTEIN	-0.035	0.035		STARCHY ROOTS	0	0		APPLES	0	0
	Obesity (Women)	0.035	0.035		POTATOES	0	0		GRAPES	0	0
	VEGETABLES	0.034	0.034		OILCROPS	0	0		FERMENTED BEVERAGES	0	0
	CHEESE	-0.034	0.034		PLANT OILS	0	0		REFINED SUGAR	0	0
	ANIMAL FAT & ANIMAL PROTEIN	-0.034	0.034		TREENUTS	0	0		VEGETABLES	0	0
	% ALCOHOLIC BEVERAGES ENERGY	0.032	0.032		PLANT PROTEIN	0	0		TOMATOES	0	0
	BEER	-0.031	0.031		PLANT FAT	0	0		RICE	0	0
	RICE	0.031	0.031		% ALCOHOLIC BEVERAGES ENERGY	0	0		STARCHY ROOTS	0	0
	MEAT TOTAL	-0.031	0.031		% PLANT FOOD ENERGY	0	0		POTATOES	0	0
	WINE	-0.029	0.029		FRESHWATER FISH	0	0		OILCROPS	0	0
	Mean BMI (Women)	0.027	0.027		MEAT TOTAL	0	0		PLANT OILS	0	0
	GRAPES	0.026	0.026		PORK	0	0		TREENUTS	0	0
	LARD	0.026	0.026		POULTRY	0	0		PLANT FAT	0	0
	MILK	-0.024	0.024		MEAT FAT	0	0		% ALCOHOLIC BEVERAGES ENERGY	0	0
	APPLES	-0.021	0.021		MEAT PROTEIN	0	0		% PLANT FOOD ENERGY	0	0
	TOTAL ENERGY	-0.021	0.021		DAIRY TOTAL	0	0		FRESHWATER FISH	0	0
	TREENUTS	0.02	0.02		CHEESE	0	0		MEAT TOTAL	0	0
	OFFALS	0.019	0.019		MILK	0	0		MEAT FAT	0	0
	FERMENTED BEVERAGES	-0.016	0.016		DAIRY FAT	0	0		MEAT PROTEIN	0	0
	CEREALS TOTAL	-0.016	0.016		DAIRY PROTEIN	0	0		DAIRY TOTAL	0	0
	PLANT FAT	-0.015	0.015		EGGS TOTAL	0	0		MILK	0	0
	DAIRY TOTAL	-0.013	0.013		LARD	0	0		DAIRY FAT	0	0
	DAIRY FAT	-0.012	0.012		OFFALS	0	0		DAIRY PROTEIN	0	0
	STARCHY ROOTS	0.011	0.011		ANIMAL FAT	0	0		EGGS TOTAL	0	0
	% CC energy	-0.011	0.011		ANIMAL FAT & ANIMAL PROTEIN	0	0		LARD	0	0
	MEAT PROTEIN	0.01	0.01		TOTAL FAT	0	0		OFFALS	0	0
	OILCROPS	-0.009	0.009		TOTAL FAT & ANIMAL PROTEIN	0	0		ANIMAL FAT	0	0
	% PLANT FOOD ENERGY	-0.007	0.007		TOTAL FAT & TOTAL PROTEIN	0	0		TOTAL FAT	0	0
	FRESHWATER FISH	-0.007	0.007		TOTAL ENERGY	0	0		TOTAL ENERGY	0	0
	DAIRY PROTEIN	0.007	0.007		Mean BMI (Women)	0	0		Mean BMI (Women)	0	0
	OPTIMAL MODELS OF PENALIZED REGRESSION ANALYSES COMPUTED VIA THE BOOTSTRAPPING METHOD (92 countries with health expenditure above 500 USD per capita).
	Ridge regression	ridge	ridge		LASSO regression	lasso	lasso		Elastic net regression	elastic	elastic
		optimal	optimal			optimal	optimal			optimal	optimal
		bootstrap	bootstrap			bootstrap	bootstrap			bootstrap	bootstrap
	Variables	beta	absolute		Variables	beta	absolute		Variables	beta	absolute
	SUNFLOWER OIL	0.127	0.127		ORANGES & MANDARINS	-0.227	0.227		ORANGES & MANDARINS	-0.187	0.187		Ridge Model (Optimal via bootstrapping)
	POULTRY	-0.091	0.091		SUNFLOWER OIL	0.181	0.181		SUNFLOWER OIL	0.178	0.178		Model	Penalty	Regularization "R Square" (1-Error)	Standardized Sum of Coefficients	Apparent Prediction Error	Expected Prediction Error
	ORANGES & MANDARINS	-0.089	0.089		CEREALS TOTAL	0.149	0.149		FISH & SEAFOOD	-0.137	0.137							Estimate	Std. Error	N
	FISH & SEAFOOD	-0.079	0.079		PLANT OILS	-0.144	0.144		CEREALS TOTAL	0.114	0.114		41c	0.8	0.887	0.004	0.113	0.314	0.055	85
	EGGS TOTAL	-0.069	0.069		FISH & SEAFOOD	-0.134	0.134		PLANT OILS	-0.114	0.114
	WINE	-0.067	0.067		REFINED SUGAR	-0.115	0.115		REFINED SUGAR	-0.108	0.108		LASSO Model (Optimal via bootstrapping)
	REFINED SUGAR	-0.065	0.065		WINE	-0.113	0.113		WINE	-0.096	0.096		Model	Penalty	Regularization "R Square" (1-Error)	Number of Selected Predictors	Standardized Sum of Coefficients	Apparent Prediction Error	Expected Prediction Error
	PELAGIC MARINE FISH	-0.06	0.06		DISTILLED BEVERAGES	-0.077	0.077		TOTAL FAT & ANIMAL PROTEIN	-0.069	0.069								Estimate	Std. Error	N
	TOTAL FAT	-0.06	0.06		MEAT PROTEIN	-0.065	0.065		WHEAT	0.059	0.059		10c	0.18	0.807	21	0.039	0.193	0.453	0.068	90
	LEGUMES incl. SOYBEANS	-0.059	0.059		PELAGIC MARINE FISH	-0.058	0.058		PELAGIC MARINE FISH	-0.059	0.059
	Obesity (Women)	0.057	0.057		Mean BMI (Women)	0.039	0.039		FRUITS TOTAL	-0.055	0.055		Elastic Net Model (Optimal via bootstrapping)
	CEREALS TOTAL	0.054	0.054		TOTAL FAT & ANIMAL PROTEIN	-0.032	0.032		Health expenditure (2012)	-0.054	0.054		Model	Ridge Penalty	Lasso Penalty	Regularization "R Square" (1-Error)	Number of Selected Predictors	Standardized Sum of Coefficients	Apparent Prediction Error	Expected Prediction Error
	Mean BMI (Women)	0.054	0.054		MEAT TOTAL	-0.029	0.029		DISTILLED BEVERAGES	-0.05	0.05									Estimate	Std. Error	N
	WHEAT	0.052	0.052		WHEAT	0.026	0.026		Mean BMI (Women)	0.049	0.049		111c	0.2	0.16	0.834	30	0.331	0.166	0.365	0.06	90
	GRAPES	0.05	0.05		TOTAL FAT	-0.012	0.012		OILCROPS	-0.044	0.044
	LEGUMES	-0.05	0.05		LEGUMES incl. SOYBEANS	-0.009	0.009		% CC energy & % SRC energy	0.041	0.041
	DISTILLED BEVERAGES	-0.049	0.049		MEAT FAT	-0.009	0.009		MEAT PROTEIN	-0.037	0.037
	OILCROPS	-0.048	0.048		% CC energy	0.008	0.008		TOTAL FAT	-0.037	0.037
	FRUITS TOTAL	-0.047	0.047		% CC energy & % SRC energy	0.006	0.006		MEAT FAT	-0.036	0.036
	TOMATOES	0.045	0.045		OFFALS	-0.005	0.005		BEER	-0.035	0.035
	TOTAL FAT & TOTAL PROTEIN	-0.043	0.043		FRUITS TOTAL	0	0		LEGUMES incl. SOYBEANS	-0.027	0.027
	TREENUTS	0.042	0.042		APPLES	0	0		REF. SUGAR & SWEETENERS TOTAL	-0.025	0.025
	TOTAL FAT & ANIMAL PROTEIN	-0.042	0.042		GRAPES	0	0		OFFALS	-0.022	0.022
	POTATOES	0.038	0.038		ALCOHOLIC BEVERAGES TOTAL	0	0		GRAPES	0.018	0.018
	% CA energy	0.038	0.038		BEER	0	0		MEAT TOTAL	-0.018	0.018
	BEER	-0.037	0.037		FERMENTED BEVERAGES	0	0		% PLANT FOOD ENERGY	0.013	0.013
	PLANT OILS	-0.037	0.037		COFFEE	0	0		% CA energy	0.008	0.008
	MEAT PROTEIN	-0.036	0.036		REF. SUGAR & SWEETENERS TOTAL	0	0		PLANT FAT	-0.007	0.007
	MILK	0.036	0.036		VEGETABLES	0	0		% CC energy	0.005	0.005
	DAIRY FAT	0.036	0.036		TOMATOES	0	0		ANIMAL PROTEIN	-0.002	0.002
	PORK	0.035	0.035		LEGUMES	0	0		APPLES	0	0
	OFFALS	-0.035	0.035		MAIZE	0	0		ALCOHOLIC BEVERAGES TOTAL	0	0
	VEGETABLES	-0.034	0.034		RICE	0	0		FERMENTED BEVERAGES	0	0
	PLANT FAT	-0.034	0.034		STARCHY ROOTS	0	0		COFFEE	0	0
	% PLANT FOOD ENERGY	0.034	0.034		POTATOES	0	0		VEGETABLES	0	0
	FRESHWATER FISH	0.034	0.034		OILCROPS	0	0		TOMATOES	0	0
	Health expenditure (2012)	-0.034	0.034		TREENUTS	0	0		LEGUMES	0	0
	RICE	-0.033	0.033		PLANT PROTEIN	0	0		MAIZE	0	0
	LARD	0.033	0.033		PLANT FAT	0	0		RICE	0	0
	MEAT FAT	-0.032	0.032		% SRC energy	0	0		STARCHY ROOTS	0	0
	% ALCOHOLIC BEVERAGES ENERGY	-0.031	0.031		% CA energy	0	0		POTATOES	0	0
	MUTTON & GOAT MEAT	0.028	0.028		% ALCOHOLIC BEVERAGES ENERGY	0	0		TREENUTS	0	0
	STARCHY ROOTS	0.027	0.027		% PLANT FOOD ENERGY	0	0		PLANT PROTEIN	0	0
	REF. SUGAR & SWEETENERS TOTAL	-0.025	0.025		FRESHWATER FISH	0	0		% SRC energy	0	0
	MAIZE	-0.024	0.024		BEEF MEAT	0	0		% ALCOHOLIC BEVERAGES ENERGY	0	0
	ANIMAL PROTEIN	-0.024	0.024		PORK	0	0		FRESHWATER FISH	0	0
	BEEF MEAT	-0.023	0.023		POULTRY	0	0		BEEF MEAT	0	0
	FERMENTED BEVERAGES	0.022	0.022		MUTTON & GOAT MEAT	0	0		PORK	0	0
	APPLES	0.019	0.019		DAIRY TOTAL	0	0		POULTRY	0	0
	CHEESE	-0.019	0.019		CHEESE	0	0		MUTTON & GOAT MEAT	0	0
	Raised cholesterol (Women)	-0.018	0.018		MILK	0	0		DAIRY TOTAL	0	0
	% SRC energy	0.017	0.017		DAIRY FAT	0	0		CHEESE	0	0
	% CC energy & % SRC energy	0.017	0.017		DAIRY PROTEIN	0	0		MILK	0	0
	DAIRY TOTAL	-0.017	0.017		EGGS TOTAL	0	0		DAIRY FAT	0	0
	TOTAL PROTEIN	-0.016	0.016		LARD	0	0		DAIRY PROTEIN	0	0
	MEAT TOTAL	-0.015	0.015		ANIMAL FAT	0	0		EGGS TOTAL	0	0
	ANIMAL FAT	-0.014	0.014		ANIMAL PROTEIN	0	0		LARD	0	0
	COFFEE	-0.013	0.013		ANIMAL FAT & ANIMAL PROTEIN	0	0		ANIMAL FAT	0	0
	PLANT PROTEIN	0.013	0.013		TOTAL PROTEIN	0	0		ANIMAL FAT & ANIMAL PROTEIN	0	0
	% CC energy	0.01	0.01		TOTAL FAT & TOTAL PROTEIN	0	0		TOTAL PROTEIN	0	0
	ANIMAL FAT & ANIMAL PROTEIN	-0.01	0.01		TOTAL ENERGY	0	0		TOTAL FAT & TOTAL PROTEIN	0	0
	DAIRY PROTEIN	-0.009	0.009		Raised cholesterol (Women)	0	0		TOTAL ENERGY	0	0
	ALCOHOLIC BEVERAGES TOTAL	-0.008	0.008		Obesity (Women)	0	0		Raised cholesterol (Women)	0	0
	TOTAL ENERGY	-0.003	0.003		Health expenditure (2012)	0	0		Obesity (Women)	0	0

## Sheet: 6-Regression - Raised bl gluc
	RAISED BLOOD GLUCOSE (WOMEN)
	OPTIMAL MODELS OF PENALIZED REGRESSION ANALYSES COMPUTED VIA THE BOOTSTRAPPING METHOD (total sample of 153 countries).
	Ridge regression	ridge	ridge		LASSO regression	lasso	lasso		Elastic net regression	elastic	elastic
		optimal	optimal			optimal	optimal			optimal	optimal
		bootstrap	bootstrap			bootstrap	bootstrap			bootstrap	bootstrap
		beta	absolute			beta	absolute			beta	absolute
	Mean BMI (Women)	0.174	0.174		Mean BMI (Women)	0.482	0.482		Mean BMI (Women)	0.419	0.419		Ridge Model (Optimal via bootstrapping)
	Obesity (Women)	0.107	0.107		TOTAL FAT & ANIMAL PROTEIN	-0.318	0.318		TOTAL FAT & ANIMAL PROTEIN	-0.192	0.192		Model	Penalty	Regularization "R Square" (1-Error)	Standardized Sum of Coefficients	Apparent Prediction Error	Expected Prediction Error
	PORK	-0.083	0.083		% CC energy	0.117	0.117		PORK	-0.125	0.125							Estimate	Std. Error	N
	PELAGIC MARINE FISH	0.073	0.073		PORK	-0.108	0.108		Obesity (Women)	0.099	0.099		33	0.64	0.892	0.008	0.108	0.22	0.042	151
	APPLES	0.066	0.066		ALCOHOLIC BEVERAGES TOTAL	-0.081	0.081		% CC energy	0.093	0.093
	FRESHWATER FISH	-0.063	0.063		CHEESE	-0.027	0.027		DAIRY TOTAL	-0.063	0.063
	COFFEE	-0.06	0.06		PELAGIC MARINE FISH	0.024	0.024		ALCOHOLIC BEVERAGES TOTAL	-0.062	0.062		LASSO Model (Optimal via bootstrapping)
	OFFALS	-0.06	0.06		FRUITS TOTAL	-0.019	0.019		PELAGIC MARINE FISH	0.061	0.061		Model	Penalty	Regularization "R Square" (1-Error)	Number of Selected Predictors	Standardized Sum of Coefficients	Apparent Prediction Error	Expected Prediction Error
	TREENUTS	-0.059	0.059		FERMENTED BEVERAGES	-0.018	0.018		COFFEE	-0.053	0.053								Estimate	Std. Error	N
	Raised cholesterol (Women)	0.059	0.059		% ALCOHOLIC BEVERAGES ENERGY	-0.018	0.018		% ALCOHOLIC BEVERAGES ENERGY	-0.049	0.049		10	0.18	0.828	15	0.047	0.172	0.249	0.039	151
	Health expenditure per capita (2012)	-0.058	0.058		CEREALS TOTAL	0.017	0.017		Health expenditure per capita (2012)	-0.046	0.046
	WHEAT	0.056	0.056		OILCROPS	0.014	0.014		CEREALS TOTAL	0.043	0.043
	CHEESE	-0.056	0.056		BEEF MEAT	-0.013	0.013		CHEESE	-0.041	0.041		Elastic Net Model (Optimal via bootstrapping)
	% CA energy	0.053	0.053		COFFEE	-0.011	0.011		FERMENTED BEVERAGES	-0.038	0.038		Model	Ridge Penalty	Lasso Penalty	Regularization "R Square" (1-Error)	Number of Selected Predictors	Standardized Sum of Coefficients	Apparent Prediction Error	Expected Prediction Error
	RICE	-0.052	0.052		Obesity (Women)	0.007	0.007		BEEF MEAT	-0.037	0.037									Estimate	Std. Error	N
	% CC energy	0.051	0.051		APPLES	0	0		% CA energy	0.032	0.032		58	0.1	0.12	0.877	29	0.242	0.123	0.226	0.039	152
	MAIZE	-0.049	0.049		GRAPES	0	0		TOTAL PROTEIN	-0.029	0.029
	DAIRY TOTAL	-0.047	0.047		ORANGES & MANDARINS	0	0		FRUITS TOTAL	-0.028	0.028
	DAIRY FAT	-0.047	0.047		BEER	0	0		WHEAT	0.028	0.028
	TOTAL FAT & TOTAL PROTEIN	0.047	0.047		DISTILLED BEVERAGES	0	0		FRESHWATER FISH	-0.024	0.024
	FERMENTED BEVERAGES	-0.046	0.046		WINE	0	0		LEGUMES	-0.02	0.02
	PLANT OILS	-0.046	0.046		REFINED SUGAR & SWEETENERS TOTAL	0	0		OILCROPS	0.02	0.02
	FISH & SEAFOOD	-0.046	0.046		REFINED SUGAR	0	0		TREENUTS	-0.02	0.02
	POULTRY	0.044	0.044		VEGETABLES	0	0		DAIRY FAT	-0.018	0.018
	ANIMAL PROTEIN	-0.044	0.044		TOMATOES	0	0		TOTAL FAT & TOTAL PROTEIN	0.018	0.018
	OILCROPS	0.042	0.042		LEGUMES	0	0		OFFALS	-0.011	0.011
	LARD	-0.042	0.042		LEGUMES incl. SOYBEANS	0	0		APPLES	0.01	0.01
	ANIMAL FAT & ANIMAL PROTEIN	-0.042	0.042		MAIZE	0	0		Raised cholesterol (Women)	0.01	0.01
	CEREALS TOTAL	0.041	0.041		RICE	0	0		LARD	-0.001	0.001
	% SRC energy	-0.04	0.04		WHEAT	0	0		GRAPES	0	0
	% CC energy & SRC energy	0.037	0.037		STARCHY ROOTS	0	0		ORANGES & MANDARINS	0	0
	MEAT FAT	-0.037	0.037		POTATOES	0	0		BEER	0	0
	FRUITS TOTAL	-0.036	0.036		PLANT OILS	0	0		DISTILLED BEVERAGES	0	0
	MUTTON & GOAT MEAT	0.035	0.035		SUNFLOWER OIL	0	0		WINE	0	0
	% ALCOHOLIC BEVERAGES ENERGY	-0.034	0.034		TREENUTS	0	0		REFINED SUGAR & SWEETENERS TOTAL	0	0
	LEGUMES	-0.033	0.033		PLANT PROTEIN	0	0		REFINED SUGAR	0	0
	TOTAL FAT & ANIMAL PROTEIN	0.033	0.033		PLANT FAT	0	0		VEGETABLES	0	0
	DAIRY PROTEIN	-0.032	0.032		% SRC energy	0	0		TOMATOES	0	0
	TOTAL FAT	-0.032	0.032		% CC energy & SRC energy	0	0		LEGUMES incl. SOYBEANS	0	0
	ANIMAL FAT	-0.031	0.031		% CA energy	0	0		MAIZE	0	0
	BEER	-0.03	0.03		% PLANT FOOD ENERGY	0	0		RICE	0	0
	TOTAL ENERGY	0.03	0.03		FISH & SEAFOOD	0	0		STARCHY ROOTS	0	0
	TOMATOES	0.029	0.029		FRESHWATER FISH	0	0		POTATOES	0	0
	SUNFLOWER OIL	-0.027	0.027		MEAT TOTAL	0	0		PLANT OILS	0	0
	REFINED SUGAR	0.026	0.026		POULTRY	0	0		SUNFLOWER OIL	0	0
	LEGUMES incl. SOYBEANS	-0.024	0.024		MUTTON & GOAT MEAT	0	0		PLANT PROTEIN	0	0
	ALCOHOLIC BEVERAGES TOTAL	-0.023	0.023		MEAT FAT	0	0		PLANT FAT	0	0
	WINE	-0.023	0.023		MEAT PROTEIN	0	0		% SRC energy	0	0
	PLANT PROTEIN	-0.023	0.023		DAIRY TOTAL	0	0		% CC energy & SRC energy	0	0
	MEAT PROTEIN	-0.023	0.023		MILK	0	0		% PLANT FOOD ENERGY	0	0
	STARCHY ROOTS	0.022	0.022		DAIRY FAT	0	0		FISH & SEAFOOD	0	0
	DISTILLED BEVERAGES	-0.021	0.021		DAIRY PROTEIN	0	0		MEAT TOTAL	0	0
	MILK	-0.021	0.021		EGGS TOTAL	0	0		POULTRY	0	0
	POTATOES	-0.02	0.02		LARD	0	0		MUTTON & GOAT MEAT	0	0
	ORANGES & MANDARINS	0.018	0.018		OFFALS	0	0		MEAT FAT	0	0
	PLANT FAT	-0.018	0.018		ANIMAL FAT	0	0		MEAT PROTEIN	0	0
	VEGETABLES	-0.017	0.017		ANIMAL PROTEIN	0	0		MILK	0	0
	EGGS TOTAL	0.016	0.016		ANIMAL FAT & ANIMAL PROTEIN	0	0		DAIRY PROTEIN	0	0
	BEEF MEAT	0.013	0.013		TOTAL FAT	0	0		EGGS TOTAL	0	0
	% PLANT FOOD ENERGY	0.011	0.011		TOTAL PROTEIN	0	0		ANIMAL FAT	0	0
	MEAT TOTAL	0.011	0.011		TOTAL FAT & TOTAL PROTEIN	0	0		ANIMAL PROTEIN	0	0
	TOTAL PROTEIN	0.01	0.01		TOTAL ENERGY	0	0		ANIMAL FAT & ANIMAL PROTEIN	0	0
	GRAPES	0.008	0.008		Raised cholesterol (Women)	0	0		TOTAL FAT	0	0
	REFINED SUGAR & SWEETENERS TOTAL	0.008	0.008		Health expenditure per capita (2012)	0	0		TOTAL ENERGY	0	0
	OPTIMAL MODELS OF PENALIZED REGRESSION ANALYSES COMPUTED VIA THE BOOTSTRAPPING METHOD (92 countries with health expenditure above 500 USD per capita).
	Ridge regression	ridge	ridge		LASSO regression	lasso	lasso		Elastic net regression	elastic	elastic
		optimal	optimal			optimal	optimal			optimal	optimal
		bootstrap	bootstrap			bootstrap	bootstrap			bootstrap	bootstrap
		beta	absolute			beta	absolute			beta	absolute
	Mean BMI (Women)	0.111	0.111		Mean BMI (Women)	0.409	0.409		Mean BMI (Women)	0.368	0.368		Ridge Model (Optimal via bootstrapping)
	COFFEE	-0.059	0.059		% CA energy	0.147	0.147		BEER	-0.133	0.133		Model	Penalty	Regularization "R Square" (1-Error)	Standardized Sum of Coefficients	Apparent Prediction Error	Expected Prediction Error
	POULTRY	0.059	0.059		BEER	-0.124	0.124		COFFEE	-0.126	0.126							Estimate	Std. Error	N
	LARD	-0.058	0.058		ANIMAL FAT & ANIMAL PROTEIN	-0.111	0.111		% CA energy	0.118	0.118		48	0.94	0.947	0.002	0.053	0.161	0.036	85
	BEER	-0.055	0.055		LARD	-0.099	0.099		LARD	-0.109	0.109
	Obesity (Women)	0.051	0.051		COFFEE	-0.094	0.094		ANIMAL FAT & ANIMAL PROTEIN	-0.057	0.057
	% CA energy	0.05	0.05		TOTAL FAT & TOTAL PROTEIN	-0.043	0.043		EGGS TOTAL	-0.045	0.045		LASSO Model (Optimal via bootstrapping)
	EGGS TOTAL	-0.047	0.047		DISTILLED BEVERAGES	-0.023	0.023		DISTILLED BEVERAGES	-0.04	0.04		Model	Penalty	Regularization "R Square" (1-Error)	Number of Selected Predictors	Standardized Sum of Coefficients	Apparent Prediction Error	Expected Prediction Error
	TOTAL PROTEIN	-0.047	0.047		BEEF MEAT	-0.008	0.008		BEEF MEAT	-0.038	0.038								Estimate	Std. Error	N
	GRAPES	-0.046	0.046		FRESHWATER FISH	-0.002	0.002		TOTAL PROTEIN	-0.038	0.038		13	0.24	0.908	11	0.024	0.092	0.2	0.045	90
	MUTTON & GOAT MEAT	0.045	0.045		EGGS TOTAL	-0.002	0.002		TOTAL FAT & ANIMAL PROTEIN	-0.038	0.038
	Health expenditure (2012)	-0.043	0.043		FRUITS TOTAL	0	0		TOTAL FAT & TOTAL PROTEIN	-0.033	0.033
	CHEESE	-0.042	0.042		APPLES	0	0		Health expenditure (2012)	-0.033	0.033		Elastic Net Model (Optimal via bootstrapping)
	TOTAL FAT & ANIMAL PROTEIN	-0.041	0.041		GRAPES	0	0		CHEESE	-0.032	0.032		Model	Ridge Penalty	Lasso Penalty	Regularization "R Square" (1-Error)	Number of Selected Predictors	Standardized Sum of Coefficients	Apparent Prediction Error	Expected Prediction Error
	TOTAL FAT & TOTAL PROTEIN	-0.041	0.041		ORANGES & MANDARINS	0	0		FRESHWATER FISH	-0.031	0.031									Estimate	Std. Error	N
	FRESHWATER FISH	-0.04	0.04		ALCOHOLIC BEVERAGES TOTAL	0	0		% ALCOHOLIC BEVERAGES ENERGY	-0.027	0.027		59	0.1	0.14	0.942	20	0.163	0.058	0.15	0.037	90
	TOMATOES	0.039	0.039		FERMENTED BEVERAGES	0	0		WINE	-0.018	0.018
	PELAGIC MARINE FISH	0.039	0.039		WINE	0	0		ANIMAL FAT	-0.018	0.018
	TOTAL FAT	-0.039	0.039		REF. SUGAR & SWEETENERS TOTAL	0	0		% CC energy	0.004	0.004
	BEEF MEAT	-0.038	0.038		REFINED SUGAR	0	0		FRUITS TOTAL	0	0
	ANIMAL FAT	-0.038	0.038		VEGETABLES	0	0		APPLES	0	0
	STARCHY ROOTS	-0.037	0.037		TOMATOES	0	0		GRAPES	0	0
	DAIRY PROTEIN	-0.037	0.037		LEGUMES	0	0		ORANGES & MANDARINS	0	0
	VEGETABLES	-0.036	0.036		LEGUMES incl. SOYBEANS	0	0		ALCOHOLIC BEVERAGES TOTAL	0	0
	PORK	-0.035	0.035		CEREALS TOTAL	0	0		FERMENTED BEVERAGES	0	0
	FRUITS TOTAL	-0.034	0.034		MAIZE	0	0		REF. SUGAR SWEETENERS TOTAL	0	0
	DISTILLED BEVERAGES	-0.034	0.034		RICE	0	0		REFINED SUGAR	0	0
	TREENUTS	0.033	0.033		WHEAT	0	0		VEGETABLES	0	0
	DAIRY TOTAL	-0.032	0.032		STARCHY ROOTS	0	0		TOMATOES	0	0
	FERMENTED BEVERAGES	-0.031	0.031		POTATOES	0	0		LEGUMES	0	0
	PLANT OILS	-0.031	0.031		OILCROPS	0	0		LEGUMES incl. SOYBEANS	0	0
	% PLANT FOOD ENERGY	0.031	0.031		PLANT OILS	0	0		CEREALS TOTAL	0	0
	WINE	-0.029	0.029		SUNFLOWER OIL	0	0		MAIZE	0	0
	ANIMAL FAT & ANIMAL PROTEIN	-0.029	0.029		TREENUTS	0	0		RICE	0	0
	% SRC energy	-0.026	0.026		PLANT PROTEIN	0	0		WHEAT	0	0
	% ALCOHOLIC BEVERAGES ENERGY	-0.026	0.026		PLANT FAT	0	0		STARCHY ROOTS	0	0
	POTATOES	0.024	0.024		% CC energy	0	0		POTATOES	0	0
	FISH & SEAFOOD	-0.024	0.024		% SRC energy	0	0		OILCROPS	0	0
	LEGUMES incl. SOYBEANS	-0.023	0.023		% CC energy & % SRC energy	0	0		PLANT OILS	0	0
	% CC energy & % SRC energy	0.023	0.023		% ALCOHOLIC BEVERAGES ENERGY	0	0		SUNFLOWER OIL	0	0
	% CC energy	0.022	0.022		% PLANT FOOD ENERGY	0	0		TREENUTS	0	0
	DAIRY FAT	-0.021	0.021		FISH & SEAFOOD	0	0		PLANT PROTEIN	0	0
	ANIMAL PROTEIN	-0.021	0.021		PELAGIC MARINE FISH	0	0		PLANT FAT	0	0
	TOTAL ENERGY	-0.021	0.021		MEAT TOTAL	0	0		% SRC energy	0	0
	OFFALS	-0.018	0.018		PORK	0	0		% CC energy & % SRC energy	0	0
	MAIZE	0.017	0.017		POULTRY	0	0		% PLANT FOOD ENERGY	0	0
	MEAT FAT	-0.017	0.017		MUTTON & GOAT MEAT	0	0		FISH & SEAFOOD	0	0
	ALCOHOLIC BEVERAGES TOTAL	-0.016	0.016		MEAT FAT	0	0		PELAGIC MARINE FISH	0	0
	CEREALS TOTAL	0.016	0.016		MEAT PROTEIN	0	0		MEAT TOTAL	0	0
	RICE	-0.016	0.016		DAIRY TOTAL	0	0		PORK	0	0
	SUNFLOWER OIL	-0.016	0.016		CHEESE	0	0		POULTRY	0	0
	LEGUMES	-0.015	0.015		MILK	0	0		MUTTON & GOAT MEAT	0	0
	WHEAT	0.014	0.014		DAIRY FAT	0	0		MEAT FAT	0	0
	PLANT PROTEIN	-0.014	0.014		DAIRY PROTEIN	0	0		MEAT PROTEIN	0	0
	MEAT PROTEIN	-0.013	0.013		OFFALS	0	0		DAIRY TOTAL	0	0
	REFINED SUGAR	0.012	0.012		ANIMAL FAT	0	0		MILK	0	0
	OILCROPS	0.012	0.012		ANIMAL PROTEIN	0	0		DAIRY FAT	0	0
	PLANT FAT	-0.01	0.01		TOTAL FAT	0	0		DAIRY PROTEIN	0	0
	MILK	0.01	0.01		TOTAL PROTEIN	0	0		OFFALS	0	0
	Raised cholesterol (Women)	-0.01	0.01		TOTAL FAT & ANIMAL PROTEIN	0	0		ANIMAL PROTEIN	0	0
	ORANGES MANDARINS	0.009	0.009		TOTAL ENERGY	0	0		TOTAL FAT	0	0
	REF. SUGAR & SWEETENERS TOTAL	0.009	0.009		Raised cholesterol (Women)	0	0		TOTAL ENERGY	0	0
	APPLES	0.008	0.008		Obesity (Women)	0	0		Raised cholesterol (Women)	0	0
	MEAT TOTAL	-0.008	0.008		Health expenditure (2012)	0	0		Obesity (Women)	0	0
