# Supplementary material for: Global Correlates of Cardiovascular Risk: A Comparison of 158 Countries
Source: Preprints.org preprint supplement (doi:10.20944/preprints201802.0066.v1), 2018-02-08
Supplement: Supplementary file 1 [file supplementary]

## **Supplementary tables and figures**

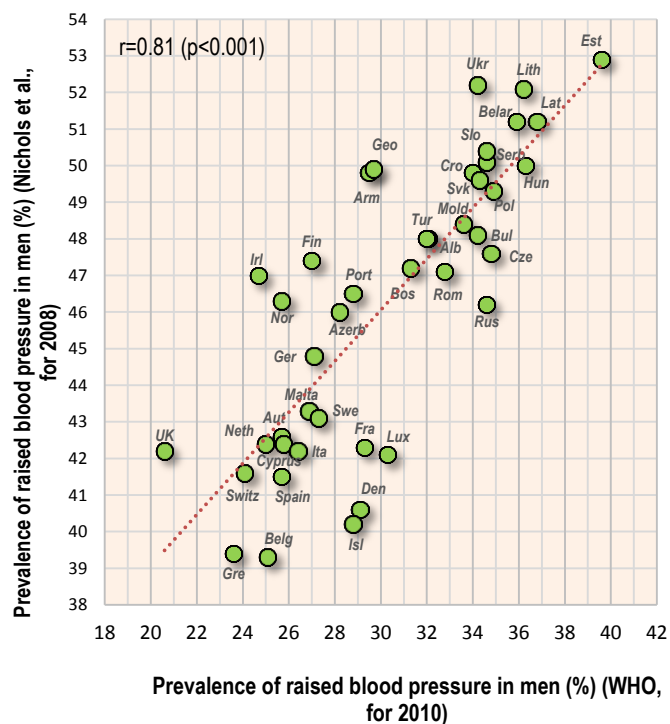

**Supplementary Fig. S1.** Correlation between the prevalence of men's raised pressure (%) by WHO (for 2010) and by Nichols et al. (for 2008, including people using blood pressure medications).

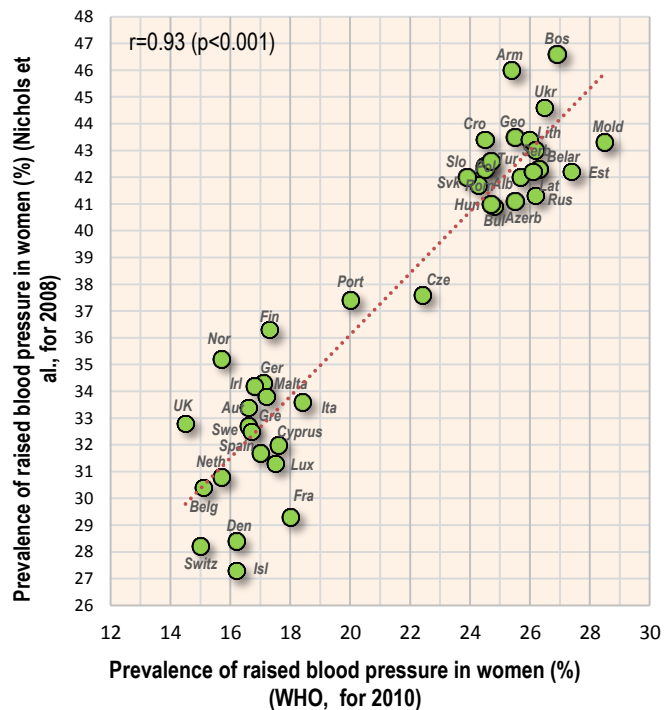

**Supplementary Fig S2.** Correlation between the prevalence of women's raised pressure by WHO (for 2010) and by Nichols et al. (for 2008, including people using blood pressure medications)

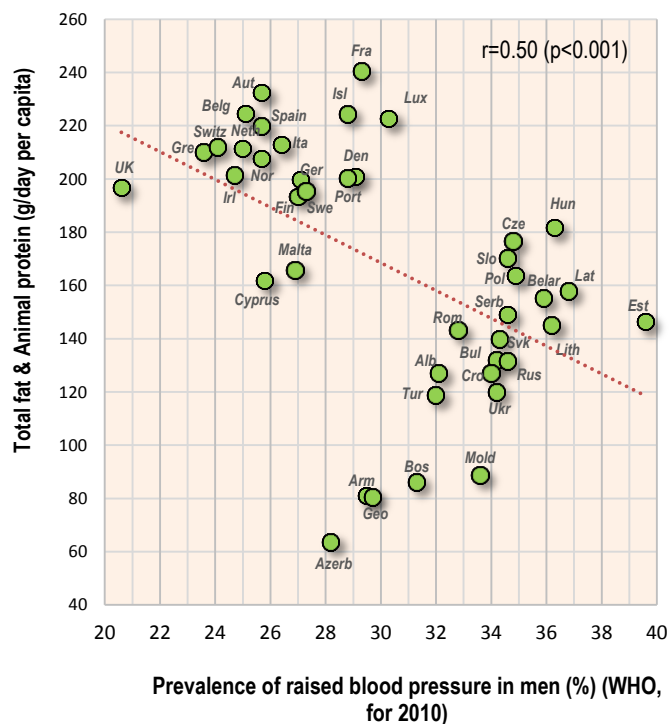

**Supplementary Fig. S3.** Correlation between the prevalence of men's raised pressure (%) by WHO (for 2010, **excluding people using medications**) and the mean consumption of total fat & animal protein (g/day per capita; FAOSTAT, 1993-2011).

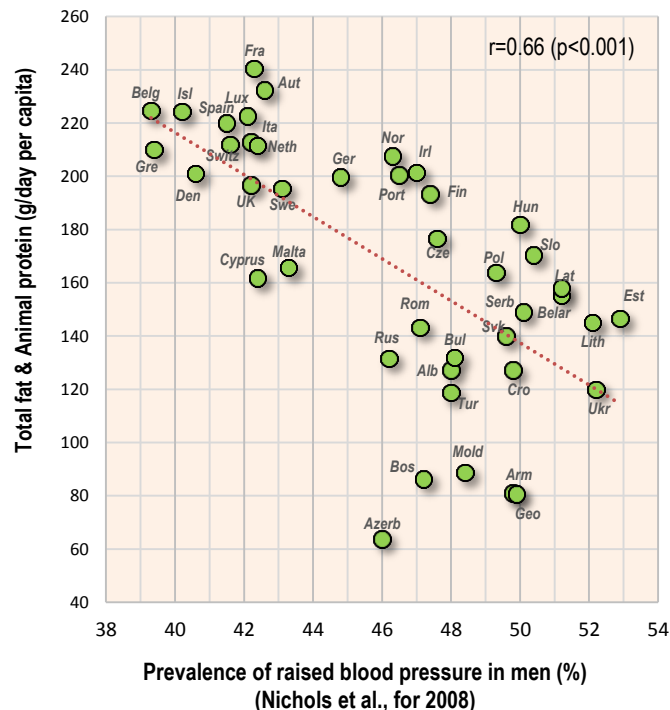

**Supplementary Fig S4.** Correlation between the prevalence of men's raised pressure by Nichols et al. (for 2008, **including people using medications**) and the mean consumption of total fat & animal protein (g/day per capita; FAOSTAT, 1993-2011).

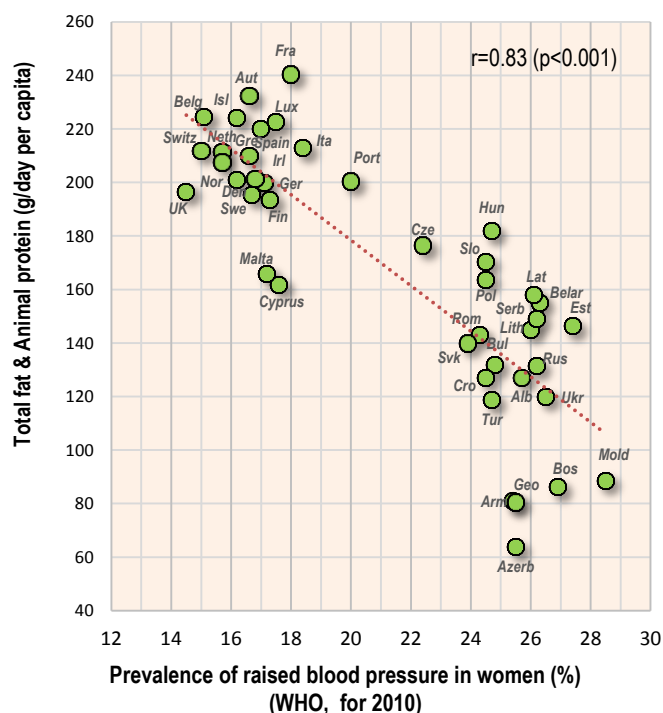

**Supplementary Fig. S5.** Correlation between the prevalence of women's raised pressure (%) by WHO (for 2010, **excluding people using medications**) and the mean consumption of total fat & animal protein (g/day per capita; FAOSTAT, 1993-2011).

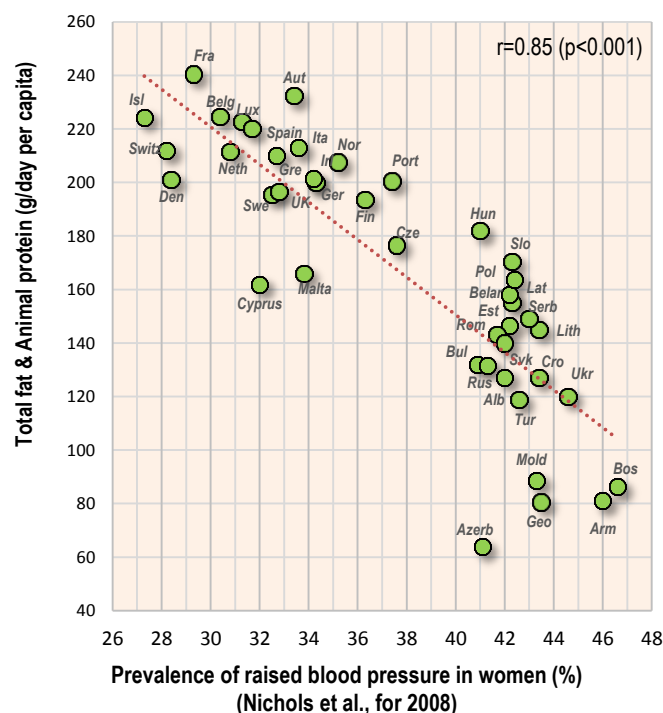

**Supplementary Fig S6.** Correlation between the prevalence of women's raised pressure by Nichols et al. (for 2008, **including people using medications**) and the mean consumption of total fat & animal protein (g/day per capita; FAOSTAT, 1993-2011).

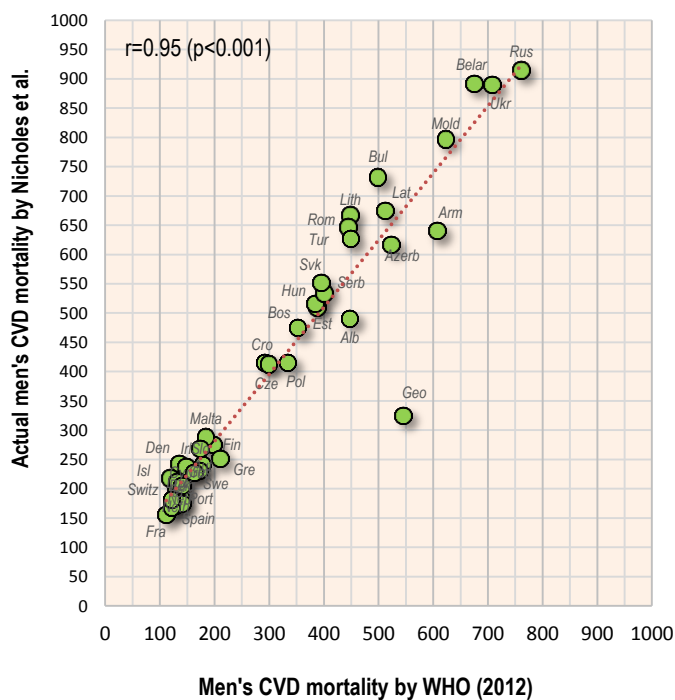

**Supplementary Fig. S7.** Correlation between men's CVD mortality by WHO (2012) and the actual men's CVD mortality in by Nichols et al. in 42 European countries (per 100,000 population).

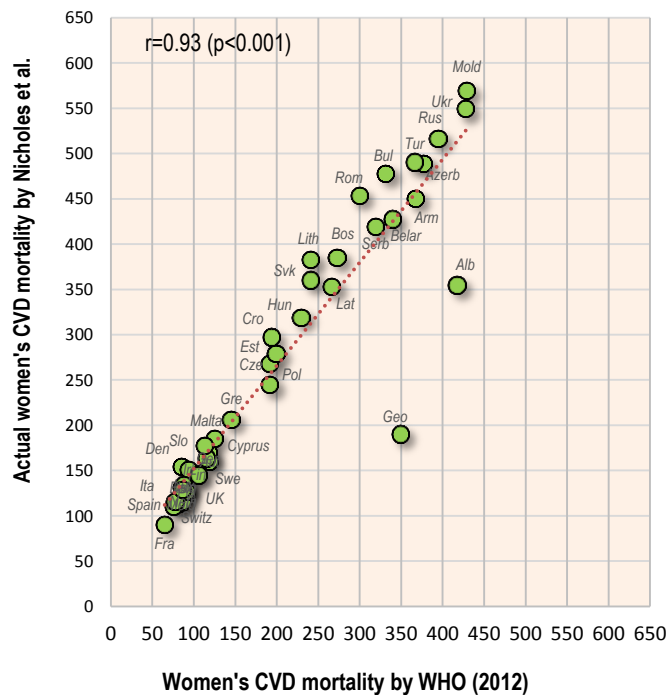

**Supplementary Fig S9.** Correlation between women's CVD mortality by WHO (2012) and the actual women's CVD mortality in by Nichols et al. in 42 European countries (per 100,000 population).

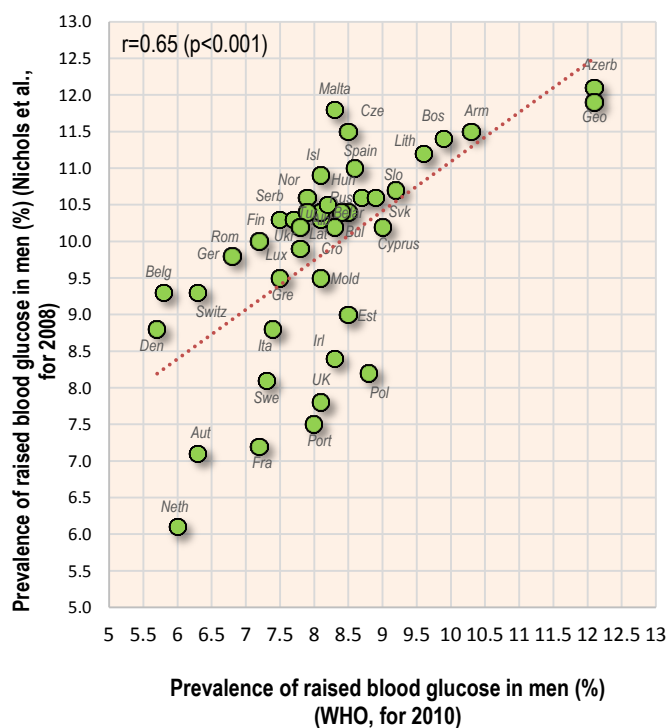

**Supplementary Fig. S10.** Correlation between the prevalence of men's raised glucose (%) by WHO (for 2010) and by Nichols et al. (for 2008) in 42 European countries.

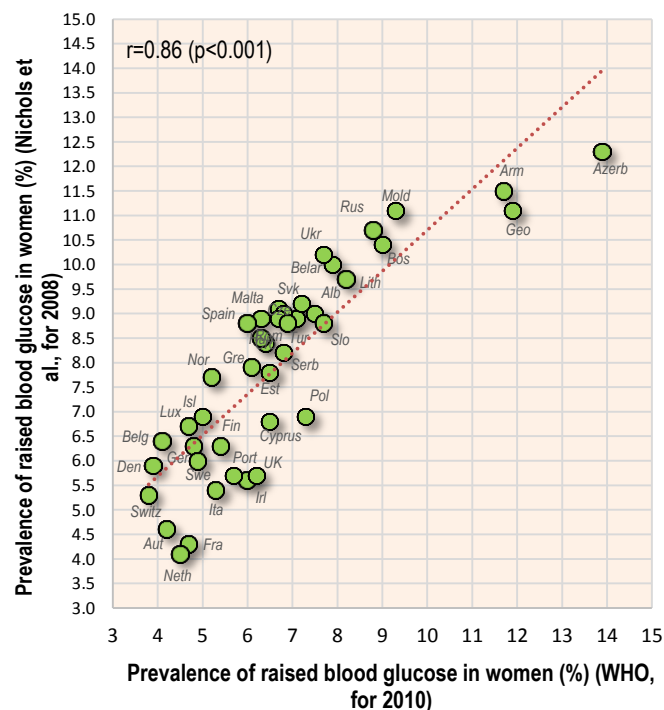

**Supplementary Fig. S11.** Correlation between the prevalence of women's raised glucose by WHO (for 2010) and by Nichols et al. (for 2008) in 42 European countries.

# Raised blood pressure

**Supplementary Table S1.** Relationship between raised blood pressure and the examined variables (total sample of 158 countries).

| Raised blood pressure (Men)   |        |                        | Raised blood pressure (Women) |        |                        |
|-------------------------------|--------|------------------------|-------------------------------|--------|------------------------|
| Positive correlates           | Mean   | Correlation & p-values | Positive correlates           | Mean   | Correlation & p-values |
| CVD MORTALITY                 | 308.0  | 0.42 (p<0.001)         | % CC energy & % SRC energy    | 42.6   | 0.69 (p<0.001)         |
| Sunflower oil                 | 5.2    | 0.29 (p=0.013)         | CVD MORTALITY                 | 241.7  | 0.69 (p<0.001)         |
| Starchy roots total           | 201.0  | 0.20 (p=0.010)         | % Plant food energy           | 79.8   | 0.64 (p<0.001)         |
| % SRC energy                  | 6.2    | 0.18 (p=0.023)         | % CA energy                   | 64.1   | 0.62 (p<0.001)         |
| Potatoes                      | 98.7   | 0.16 (p=0.039)         | % CC energy                   | 36.4   | 0.50 (p<0.001)         |
| Offals                        | 7.6    | 0.16 (p=0.041)         | % SRC energy                  | 6.2    | 0.35 (p<0.001)         |
| Milk                          | 169.0  | 0.15 (p=0.053)         | Legumes (excl. Soybeans)      | 16.0   | 0.28 (p<0.001)         |
| % Alcoholic beverages energy  | 168.9  | 0.15 (p=0.06)          | RAISED BLOOD GLUCOSE (%)      | 8.8    | 0.28 (p<0.001)         |
| Distilled beverages           | 7.7    | 0.12 (p=0.14)          | Maize                         | 60.2   | 0.27 (p<0.001)         |
| % CC energy & % SRC energy    | 42.6   | 0.11 (p=0.16)          | Cereals total                 | 373.7  | 0.26 (p<0.001)         |
| Negative correlates           | Mean   | Correlation & p-values | Negative correlates           | Mean   | Correlation & p-values |
| LIFE EXPECTANCY               | 68.2   | -0.39 (p<0.001)        | LIFE EXPECTANCY               | 73.0   | -0.79 (p<0.001)        |
| Oranges & mandarins           | 38.9   | -0.33 (p<0.001)        | RAISED CHOLESTEROL (%)        | 40.5   | -0.73 (p<0.001)        |
| Fruits total                  | 204.9  | -0.32 (p<0.001)        | Animal protein                | 32.8   | -0.71 (p<0.001)        |
| Rice                          | 79.7   | -0.31 (p<0.001)        | HEALTH EXPENDITURE            | 1254.9 | -0.71 (p<0.001)        |
| Poultry                       | 38.4   | -0.28 (p<0.001)        | Animal fat & Animal protein   | 68.6   | -0.70 (p<0.001)        |
| Oilcrops                      | 16.5   | -0.28 (p<0.001)        | Total fat & Animal protein    | 111.3  | -0.70 (p<0.001)        |
| HEALTH EXPENDITURE            | 1254.9 | -0.27 (p<0.001)        | Meat total                    | 117.7  | -0.70 (p<0.001)        |
| Fish & seafood                | 43.2   | -0.27 (p<0.001)        | Meat protein                  | 14.9   | -0.67 (p<0.001)        |
| Tree nuts                     | 5.2    | -0.24 (p=0.002)        | Animal fat                    | 35.9   | -0.67 (p<0.001)        |
| Ref. sugar & sweeteners total | 80.1   | -0.21 (p=0.006)        | Total fat & Total protein     | 154.4  | -0.66 (p<0.001)        |

**Supplementary Table S2.** Relationship between raised blood pressure and the examined variables (the world outside Europe, 116 countries).

| Raised blood pressure (Men)   |       |                        | Raised blood pressure (Women) |       |                        |
|-------------------------------|-------|------------------------|-------------------------------|-------|------------------------|
| Positive correlates           | Mean  | Correlation & p-values | Positive correlates           | Mean  | Correlation & p-values |
| % CC energy & % SRC energy    | 46.7  | 0.33 (p<0.001)         | % CC energy & % SRC energy    | 11.6  | 0.62 (p<0.001)         |
| CVD MORTALITY                 | 305.5 | 0.30 (p<0.001)         | % Plant food energy           | 8.2   | 0.62 (p<0.001)         |
| % Plant food energy           | 84.4  | 0.30 (p<0.001)         | CVD MORTALITY                 | 114.0 | 0.61 (p<0.001)         |
| % SRC energy                  | 7.0   | 0.28 (p=0.004)         | % CA energy                   | 6.8   | 0.50 (p<0.001)         |
| Mutton & goat meat            | 9.9   | 0.23 (p=0.015)         | % CC energy                   | 11.5  | 0.36 (p<0.001)         |
| % CA energy                   | 67.1  | 0.21 (p=0.021)         | % SRC energy                  | 9.2   | 0.34 (p<0.001)         |
| Starchy roots total           | 196.4 | 0.21 (p=0.027)         | Fermented beverages           | 68.6  | 0.25 (p=0.006)         |
| Fermented beverages           | 22.0  | 0.20 (p=0.032)         | Starchy roots                 | 215.7 | 0.25 (p=0.007)         |
| % CC energy                   | 39.7  | 0.12 (p=0.21)          | Legumes (excl. Soybeans)      | 14.3  | 0.22 (p=0.019)         |
| Legumes (excl. Soybeans)      | 19.2  | 0.12 (p=0.21)          | Maize                         | 87.5  | 0.19 (p=0.040)         |
| Negative correlates           | Mean  | Correlation & p-values | Negative correlates           | Mean  | Correlation & p-values |
| LIFE EXPECTANCY               | 65.9  | -0.65 (p<0.001)        | LIFE EXPECTANCY               | 70.2  | -0.80 (p<0.001)        |
| Eggs total                    | 12.6  | -0.52 (p<0.001)        | RAISED CHOLESTEROL (%)        | 36.0  | -0.72 (p<0.001)        |
| Pork                          | 14.8  | -0.51 (p<0.001)        | Eggs total                    | 12.6  | -0.70 (p<0.001)        |
| HEALTH EXPENDITURE            | 767.0 | -0.50 (p<0.001)        | Animal fat & Animal protein   | 50.6  | -0.68 (p<0.001)        |
| RAISED CHOLESTEROL (%)        | 32.7  | -0.47 (p<0.001)        | Animal protein                | 25.5  | -0.68 (p<0.001)        |
| Coffee                        | 3.2   | -0.45 (p<0.001)        | Animal fat                    | 25.1  | -0.65 (p<0.001)        |
| Ref. sugar & sweeteners total | 71.2  | -0.44 (p<0.001)        | Meat total                    | 93.3  | -0.65 (p<0.001)        |
| Beer                          | 43.9  | -0.39 (p<0.001)        | Pork                          | 14.8  | -0.64 (p<0.001)        |
| Poultry                       | 36.3  | -0.38 (p<0.001)        | Ref. sugar & sweeteners total | 71.2  | -0.64 (p<0.001)        |
| Apples                        | 13.4  | -0.37 (p<0.001)        | Total fat & Animal protein    | 91.1  | -0.64 (p<0.001)        |

Level of significance:

| Positive correlates |         | Negative correlates |         |
|---------------------|---------|---------------------|---------|
| p≥0.001             | p<0.001 | p≥0.001             | p<0.001 |

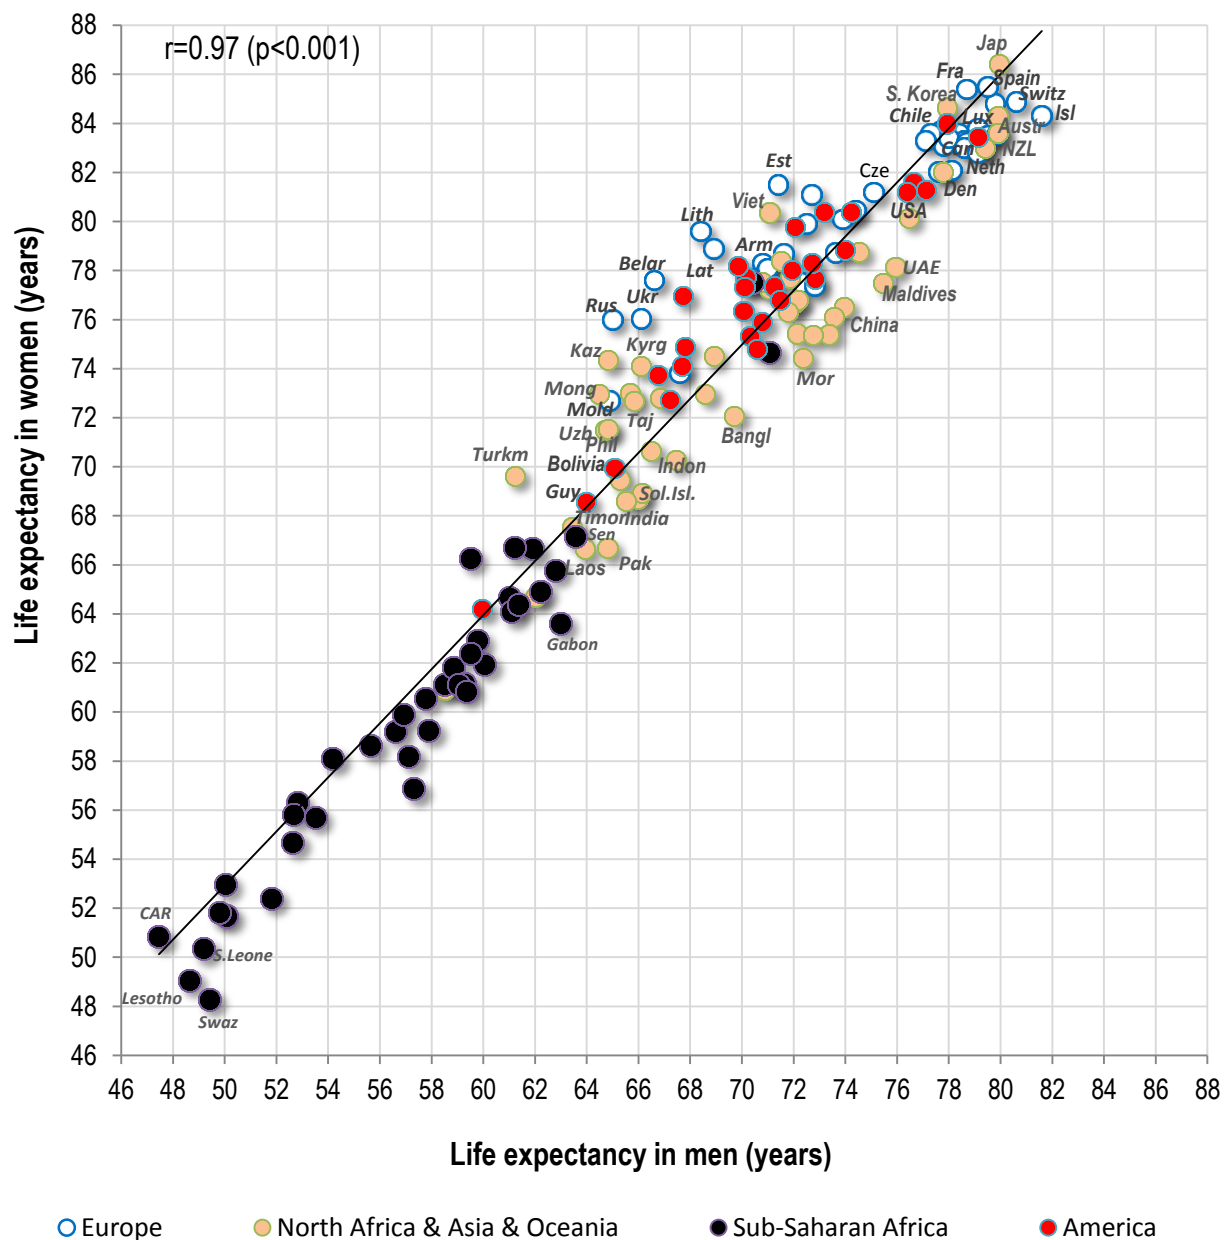

**Supplementary Fig. S12.** Relationship between life expectancy in men and women (WHO, 2012).

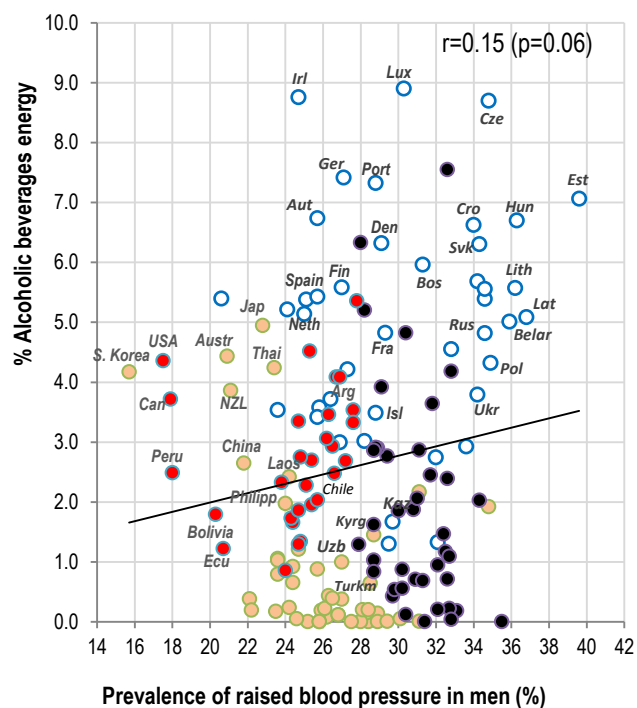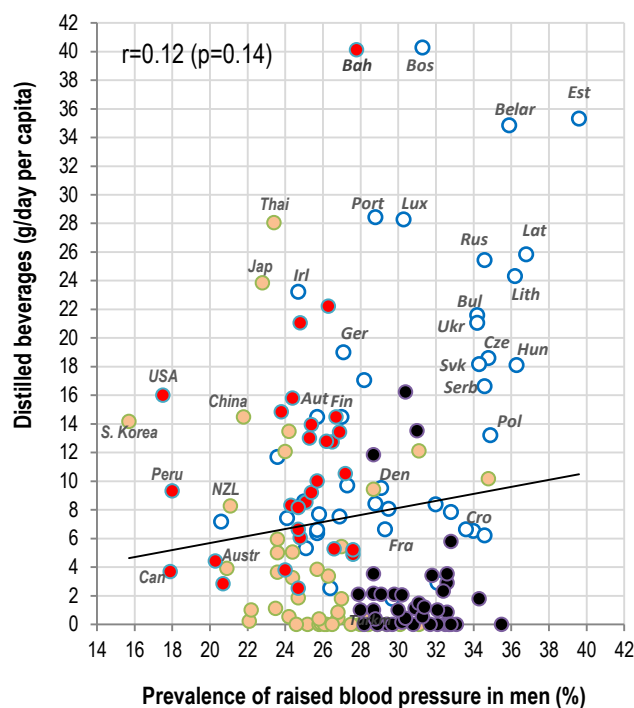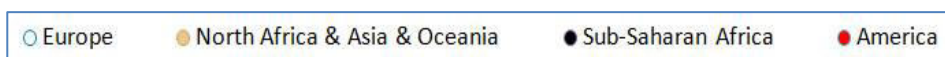

**Supplementary Fig. S12.** Relationship between the prevalence of men's raised blood pressure (%; WHO, 2010) and the mean proportion of energy from alcoholic beverages (%; FAOSTAT, 1993-2011).

**Supplementary Fig. S13.** Relationship between the prevalence of men's raised blood pressure (%; WHO, 2010) and the mean consumption of distilled beverages (g/day per capita; FAOSTAT, 1993-2011).

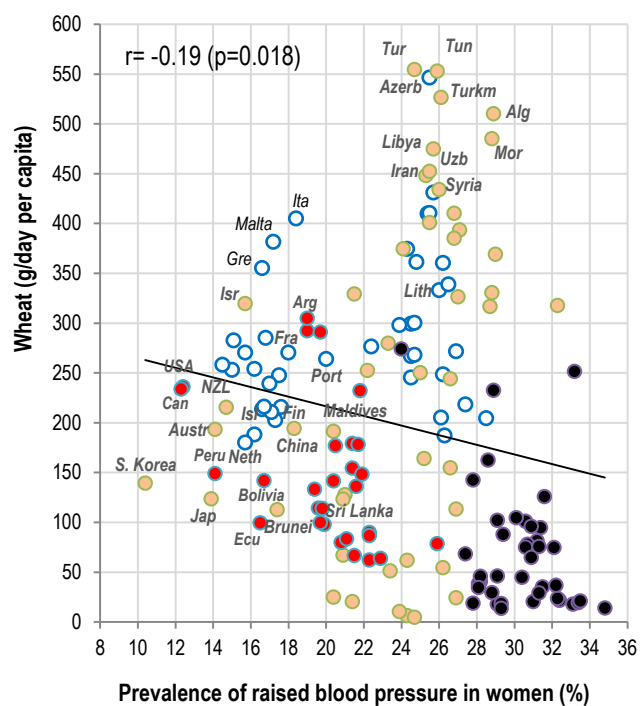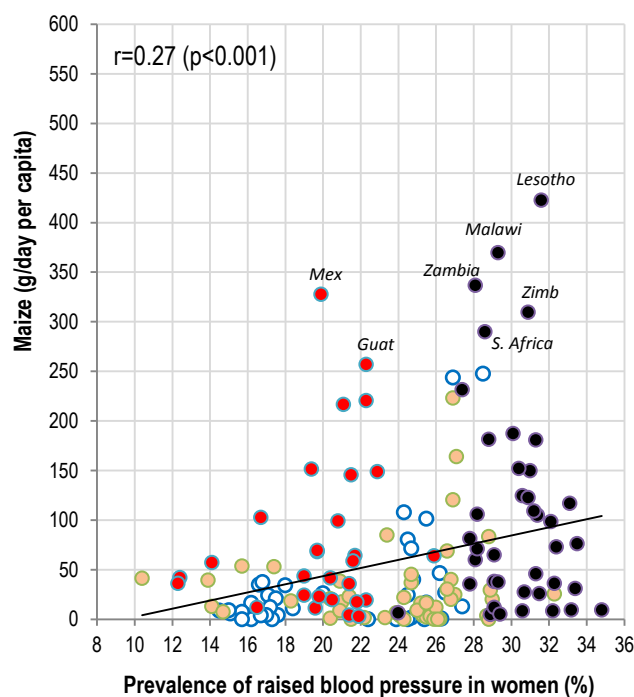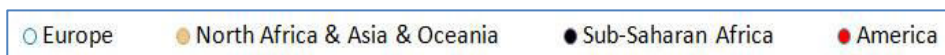

**Supplementary Fig. S15.** Relationship between the prevalence of women's raised blood pressure (%; WHO, 2010) and the mean consumption of wheat (g/day per capita; FAOSTAT, 1993-2011).

**Supplementary Fig. S16.** Relationship between the prevalence of women's raised blood pressure (%; WHO, 2010) and the mean consumption of maize (g/day per capita; FAOSTAT, 1993-2011).



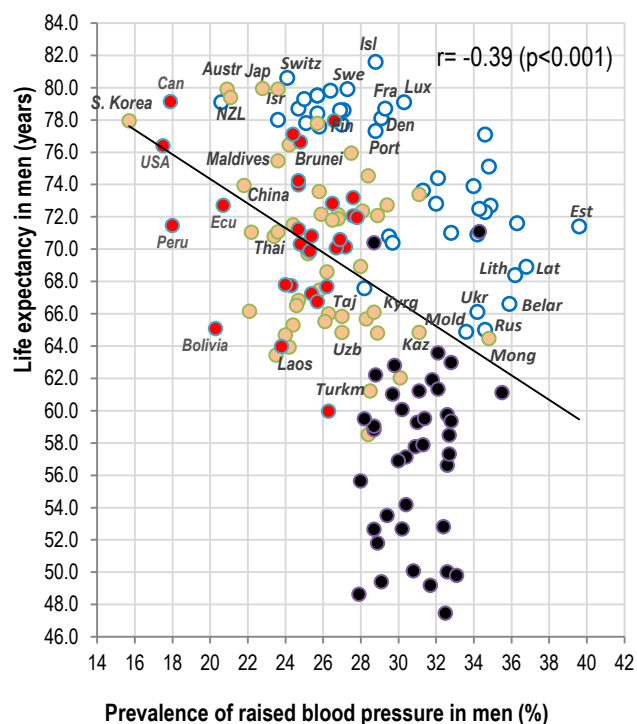

**Supplementary Fig. S17.** Relationship between the prevalence of men's raised blood pressure (%; WHO, 2010) and men's life expectancy (World Bank, 2012).

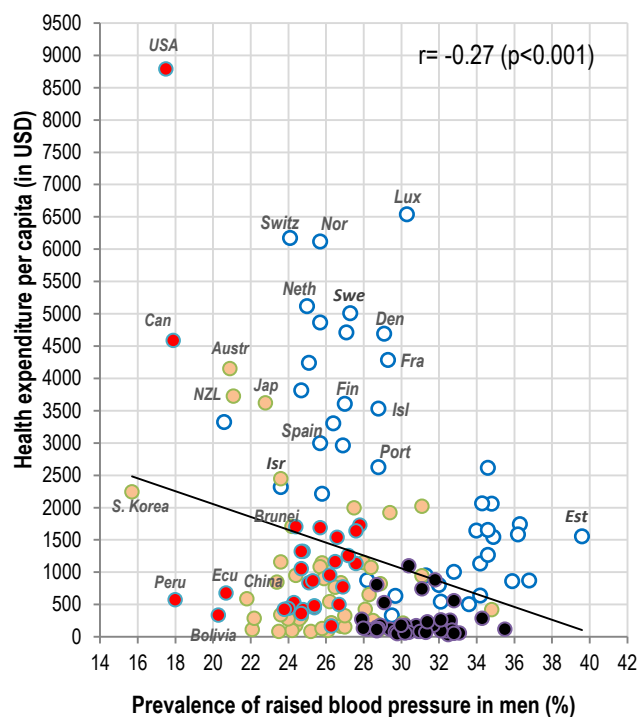

**Supplementary Fig. S18.** Relationship between the prevalence of men's raised blood pressure (%; WHO, 2010) and health expenditure per capita for 2012 (in USD).

# Raised cholesterol

**Supplementary Table S3.** Relationship between raised cholesterol and the examined variables (total sample of 158 countries).

| Raised cholesterol (Men)    |       |                        | Raised cholesterol (Women)  |       |                        |
|-----------------------------|-------|------------------------|-----------------------------|-------|------------------------|
| Positive correlates         | Mean  | Correlation & p-values | Positive correlates         | Mean  | Correlation & p-values |
| Animal fat & Animal protein | 68.6  | 0.89 (p<0.001)         | Animal fat & Animal protein | 68.6  | 0.85 (p<0.001)         |
| Animal protein              | 32.8  | 0.88 (p<0.001)         | Animal protein              | 32.8  | 0.85 (p<0.001)         |
| Animal fat                  | 35.9  | 0.87 (p<0.001)         | Total fat & Animal protein  | 111.3 | 0.84 (p<0.001)         |
| Total fat & Animal protein  | 111.3 | 0.87 (p<0.001)         | <i>LIFE EXPECTANCY</i>      | 73.0  | 0.83 (p<0.001)         |
| Total fat & Total protein   | 154.4 | 0.86 (p<0.001)         | Total fat & Total protein   | 154.4 | 0.83 (p<0.001)         |
| Total fat                   | 78.6  | 0.84 (p<0.001)         | Animal fat                  | 35.9  | 0.83 (p<0.001)         |
| Meat total                  | 117.7 | 0.82 (p<0.001)         | Total protein               | 75.8  | 0.80 (p<0.001)         |
| Total protein               | 75.8  | 0.82 (p<0.001)         | Meat total                  | 117.7 | 0.80 (p<0.001)         |
| Meat protein                | 14.9  | 0.81 (p<0.001)         | Total fat                   | 78.6  | 0.80 (p<0.001)         |
| <i>LIFE EXPECTANCY</i>      | 68.2  | 0.80 (p<0.001)         | Eggs total                  | 17.1  | 0.79 (p<0.001)         |

  

| Negative correlates        | Mean | Correlation & p-values | Negative correlates              | Mean  | Correlation & p-values |
|----------------------------|------|------------------------|----------------------------------|-------|------------------------|
| % Plant food energy        | 79.8 | -0.84 (p<0.001)        | % Plant food energy              | 79.8  | -0.80 (p<0.001)        |
| % CC energy & % SRC energy | 42.6 | -0.79 (p<0.001)        | % CC energy & % SRC energy       | 42.6  | -0.79 (p<0.001)        |
| % CA energy                | 64.1 | -0.79 (p<0.001)        | % CA energy                      | 64.1  | -0.75 (p<0.001)        |
| % CC energy                | 36.4 | -0.59 (p<0.001)        | <i>RAISED BLOOD PRESSURE (%)</i> | 24.0  | -0.73 (p<0.001)        |
| Legumes (excl. Soybeans)   | 16.0 | -0.41 (p<0.001)        | % CC energy                      | 36.4  | -0.57 (p<0.001)        |
| Legumes (incl. Soybeans)   | 17.2 | -0.40 (p<0.001)        | <i>CVD MORTALITY</i>             | 241.7 | -0.52 (p<0.001)        |
| % SRC energy               | 6.2  | -0.39 (p<0.001)        | % SRC energy                     | 6.2   | -0.42 (p<0.001)        |
| Maize                      | 60.2 | -0.36 (p<0.001)        | Legumes (excl. Soybeans)         | 16.0  | -0.39 (p<0.001)        |
| Rice                       | 79.7 | -0.30 (p<0.001)        | Legumes (incl. Soybeans)         | 17.2  | -0.38 (p<0.001)        |
| Fermented beverages        | 16.9 | -0.29 (p<0.001)        | Maize                            | 60.2  | -0.35 (p<0.001)        |

**Supplementary Table S4.** Relationship between raised cholesterol and the examined variables (the world outside Europe, 116 countries).

| Raised cholesterol (Men)    |       |                        | Raised cholesterol (Women)  |       |                        |
|-----------------------------|-------|------------------------|-----------------------------|-------|------------------------|
| Positive correlates         | Mean  | Correlation & p-values | Positive correlates         | Mean  | Correlation & p-values |
| Animal fat & Animal protein | 50.6  | 0.78 (p<0.001)         | <i>LIFE EXPECTANCY</i>      | 70.2  | 0.78 (p<0.001)         |
| Animal protein              | 25.5  | 0.78 (p<0.001)         | Animal protein              | 25.5  | 0.77 (p<0.001)         |
| Total fat & Animal protein  | 91.1  | 0.76 (p<0.001)         | Animal fat & Animal protein | 50.6  | 0.76 (p<0.001)         |
| <i>LIFE EXPECTANCY</i>      | 65.9  | 0.75 (p<0.001)         | Total fat & Animal protein  | 91.1  | 0.74 (p<0.001)         |
| Animal fat                  | 25.1  | 0.74 (p<0.001)         | Total fat & Total protein   | 134.2 | 0.73 (p<0.001)         |
| Total fat & Total protein   | 134.2 | 0.74 (p<0.001)         | Eggs total                  | 12.6  | 0.73 (p<0.001)         |
| Meat total                  | 93.3  | 0.73 (p<0.001)         | Poultry                     | 36.3  | 0.72 (p<0.001)         |
| Meat protein                | 12.1  | 0.72 (p<0.001)         | Meat total                  | 93.3  | 0.72 (p<0.001)         |
| Eggs total                  | 12.6  | 0.71 (p<0.001)         | Animal fat                  | 25.1  | 0.71 (p<0.001)         |
| <i>OBESITY (%)</i>          | 10.6  | 0.71 (p<0.001)         | Total protein               | 68.6  | 0.71 (p<0.001)         |

  

| Negative correlates              | Mean  | Correlation & p-values | Negative correlates              | Mean  | Correlation & p-values |
|----------------------------------|-------|------------------------|----------------------------------|-------|------------------------|
| % Plant food energy              | 84.4  | -0.67 (p<0.001)        | <i>RAISED BLOOD PRESSURE (%)</i> | 25.0  | -0.72 (p<0.001)        |
| % CC energy & % SRC energy       | 46.7  | -0.65 (p<0.001)        | % CC energy & % SRC energy       | 46.7  | -0.68 (p<0.001)        |
| % CA energy                      | 67.1  | -0.61 (p<0.001)        | % Plant food energy              | 84.4  | -0.64 (p<0.001)        |
| <i>RAISED BLOOD PRESSURE (%)</i> | 27.3  | -0.47 (p<0.001)        | % CA energy                      | 67.1  | -0.59 (p<0.001)        |
| % SRC energy                     | 7.0   | -0.41 (p<0.001)        | <i>CVD MORTALITY</i>             | 256.1 | -0.45 (p<0.001)        |
| Starchy roots total              | 196.4 | -0.34 (p<0.001)        | % SRC energy                     | 7.0   | -0.43 (p<0.001)        |
| % CC energy                      | 39.7  | -0.33 (p<0.001)        | Starchy roots                    | 196.4 | -0.35 (p<0.001)        |
| Fermented beverages              | 22.0  | -0.30 (p=0.001)        | % CC energy                      | 39.7  | -0.34 (p<0.001)        |
| Maize                            | 70.8  | -0.26 (p=0.006)        | Fermented beverages              | 22.0  | -0.32 (p<0.001)        |
| Legumes (excl. Soybeans)         | 19.2  | -0.26 (p=0.007)        | Legumes (excl. Soybeans)         | 19.2  | -0.25 (p=0.007)        |

Level of significance:

| Positive correlates |         | Negative correlates |         |
|---------------------|---------|---------------------|---------|
| p≥0.001             | p<0.001 | p≥0.001             | p<0.001 |

# CVD mortality

**Supplementary Table S5.** Relationship between CVD mortality and the examined variables (total sample of 158 countries).

| CVD mortality (Men)        |        |                        | CVD mortality (Women)         |        |                        |
|----------------------------|--------|------------------------|-------------------------------|--------|------------------------|
| Positive correlates        | Mean   | Correlation (p-values) | Positive correlates           | Mean   | Correlation (p-values) |
| Cereals total              | 373.7  | 0.42 (p<0.001)         | RAISED BLOOD PRESSURE (%)     | 24.0   | 0.69 (p<0.001)         |
| RAISED BLOOD PRESSURE (%)  | 28.1   | 0.42 (p<0.001)         | % CC energy & % SRC energy    | 42.6   | 0.58 (p<0.001)         |
| Wheat                      | 197.0  | 0.37 (p<0.001)         | % CC energy                   | 36.4   | 0.51 (p<0.001)         |
| % CC energy                | 36.4   | 0.35 (p<0.001)         | % CA energy                   | 64.1   | 0.47 (p<0.001)         |
| % CC energy & % SRC energy | 42.6   | 0.34 (p<0.001)         | % Plant food energy           | 79.8   | 0.45 (p<0.001)         |
| RAISED BLOOD GLUCOSE (%)   | 9.1    | 0.30 (p<0.001)         | Cereals total                 | 373.7  | 0.41 (p<0.001)         |
| % CA energy                | 64.1   | 0.26 (p=0.001)         | RAISED BLOOD GLUCOSE (%)      | 8.8    | 0.36 (p<0.001)         |
| Plant protein              | 43.0   | 0.25 (p=0.002)         | Plant protein                 | 43.0   | 0.25 (p=0.001)         |
| Sunflower oil              | 5.2    | 0.24 (p=0.002)         | % SRC energy                  | 6.2    | 0.16 (p=0.040)         |
| Milk                       | 169.0  | 0.21 (p=0.009)         | Wheat                         | 197.0  | 0.16 (p=0.049)         |
| Negative correlates        | Mean   | Correlation (p-values) | Negative correlates           | Mean   | Correlation (p-values) |
| HEALTH EXPENDITURE         | 1254.9 | -0.43 (p<0.001)        | HEALTH EXPENDITURE            | 1254.9 | -0.59 (p<0.001)        |
| Oranges & mandarins        | 38.9   | -0.41 (p<0.001)        | Coffee                        | 5.6    | -0.55 (p<0.001)        |
| Coffee                     | 5.6    | -0.40 (p<0.001)        | Total fat & Animal protein    | 111.3  | -0.54 (p<0.001)        |
| Fruits total               | 204.9  | -0.38 (p<0.001)        | LIFE EXPECTANCY               | 73.0   | -0.54 (p<0.001)        |
| Cheese                     | 11.5   | -0.35 (p<0.001)        | Meat total                    | 117.7  | -0.53 (p<0.001)        |
| LIFE EXPECTANCY            | 68.2   | -0.33 (p<0.001)        | Total fat                     | 78.6   | -0.53 (p<0.001)        |
| Plant fat                  | 42.7   | -0.32 (p<0.001)        | Oranges & Mandarins           | 38.9   | -0.53 (p<0.001)        |
| Beer                       | 77.6   | -0.31 (p<0.001)        | Ref. sugar & sweeteners total | 80.1   | -0.53 (p<0.001)        |
| Alcoholic beverages total  | 118.8  | -0.31 (p<0.001)        | Animal protein                | 32.8   | -0.53 (p<0.001)        |
| Total fat                  | 78.6   | -0.30 (p<0.001)        | Cheese                        | 11.5   | -0.53 (p<0.001)        |

**Supplementary Table S6.** Relationship between CVD mortality and the examined variables (the world outside Europe, 116 countries).

| CVD mortality (Men)           |       |                        | CVD mortality (Women)         |       |                        |
|-------------------------------|-------|------------------------|-------------------------------|-------|------------------------|
| Positive correlates           | Mean  | Correlation (p-values) | Positive correlates           | Mean  | Correlation (p-values) |
| Wheat                         | 164.4 | 0.44 (p<0.001)         | RAISED BLOOD PRESSURE (%)     | 25.0  | 0.61 (p<0.001)         |
| Cereals total                 | 377.6 | 0.37 (p<0.001)         | % CC energy & % SRC energy    | 46.7  | 0.50 (p<0.001)         |
| Mutton & Goat meat            | 9.9   | 0.34 (p<0.001)         | % CC energy                   | 39.7  | 0.39 (p<0.001)         |
| RAISED BLOOD GLUCOSE (%)      | 9.4   | 0.31 (p<0.001)         | % Plant food energy           | 84.4  | 0.35 (p<0.001)         |
| % CC energy                   | 39.7  | 0.31 (p<0.001)         | Cereals total                 | 377.6 | 0.33 (p<0.001)         |
| RAISED BLOOD PRESSURE (%)     | 27.3  | 0.30 (p=0.001)         | % CA energy                   | 67.1  | 0.29 (p=0.001)         |
| % CC energy & % SRC energy    | 46.7  | 0.29 (p=0.002)         | Mutton & Goat meat            | 9.9   | 0.23 (p=0.008)         |
| Grapes                        | 9.1   | 0.25 (p=0.006)         | Wheat                         | 164.4 | 0.23 (p=0.015)         |
| Plant protein                 | 43.1  | 0.22 (p=0.016)         | Plant protein                 | 43.1  | 0.22 (p=0.017)         |
| Milk                          | 134.1 | 0.20 (p=0.027)         | RAISED BLOOD GLUCOSE (%)      | 9.6   | 0.19 (p=0.020)         |
| Negative correlates           | Mean  | Correlation (p-values) | Negative correlates           | Mean  | Correlation (p-values) |
| Beer                          | 43.9  | -0.38 (p<0.001)        | Ref. sugar & sweeteners total | 71.2  | -0.52 (p<0.001)        |
| Coffee                        | 3.2   | -0.36 (p<0.001)        | LIFE EXPECTANCY               | 70.2  | -0.51 (p<0.001)        |
| HEALTH EXPENDITURE            | 767.0 | -0.32 (p<0.001)        | Beer                          | 43.9  | -0.50 (p<0.001)        |
| Pork                          | 14.8  | -0.30 (p<0.001)        | Eggs total                    | 12.6  | -0.48 (p<0.001)        |
| Ref. sugar & sweeteners total | 71.2  | -0.30 (p=0.001)        | Poultry                       | 36.3  | -0.47 (p<0.001)        |
| Poultry                       | 36.3  | -0.29 (p=0.001)        | Coffee                        | 3.2   | -0.47 (p<0.001)        |
| Fruits total                  | 192.2 | -0.29 (p=0.001)        | Refined sugar                 | 59.4  | -0.46 (p<0.001)        |
| Eggs total                    | 12.6  | -0.29 (p=0.001)        | Pork                          | 14.8  | -0.45 (p<0.001)        |
| Alcoholic beverages total     | 76.2  | -0.29 (p=0.002)        | HEALTH EXPENDITURE            | 767.0 | -0.45 (p<0.001)        |
| Cheese                        | 5.1   | -0.27 (p=0.004)        | RAISED CHOLESTEROL (%)        | 36.0  | -0.45 (p<0.001)        |

Level of significance:

| Positive correlates |         | Negative correlates |         |
|---------------------|---------|---------------------|---------|
| p≥0.001             | p<0.001 | p≥0.001             | p<0.001 |

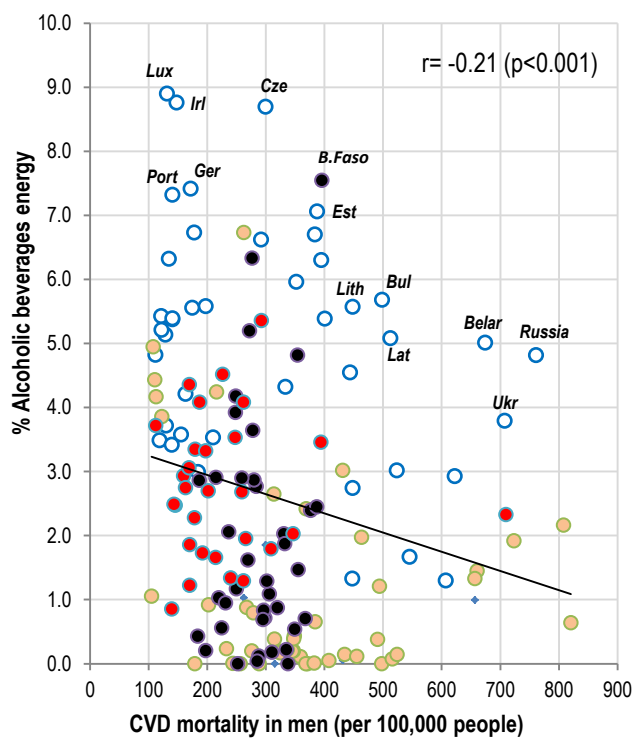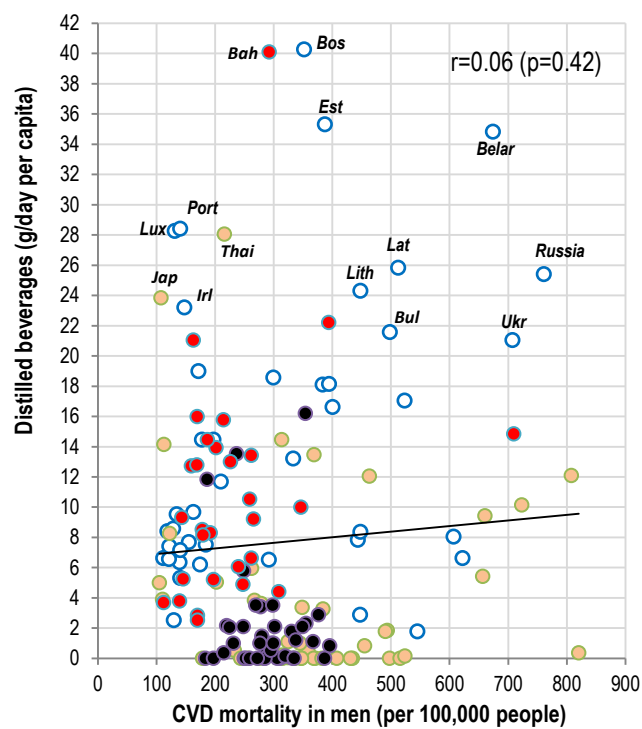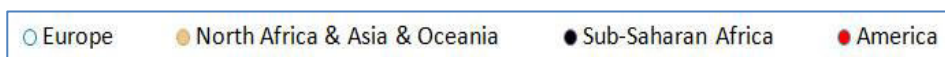

**Supplementary Fig. S19.** Relationship between men's CVD mortality (WHO, 2012) and the mean proportion of energy from alcoholic beverages (%; FAOSTAT, 1993-2011).

**Supplementary Fig. S20.** Relationship between men's CVD mortality (WHO, 2012) and the mean consumption of distilled beverages (g/day per capita; FAOSTAT, 1993-2011).

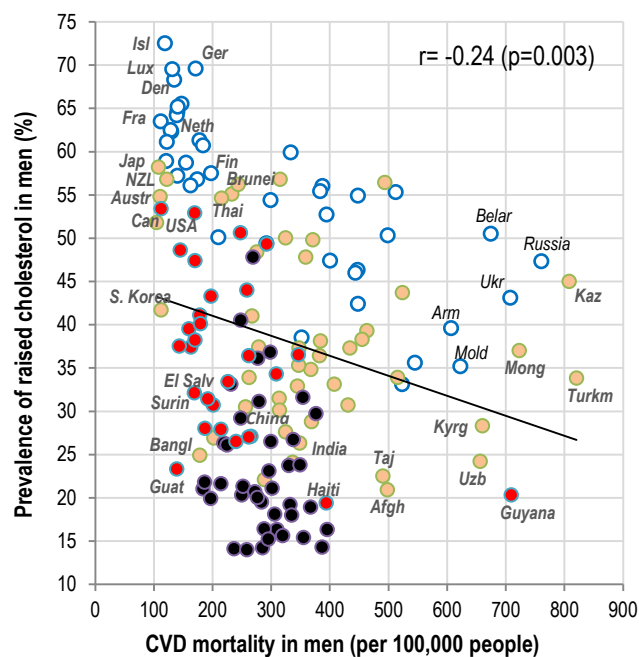

**Supplementary Fig. S21.** Relationship between men's CVD mortality (WHO, 2012) and the prevalence of men's raised cholesterol (%; WHO, 2010).

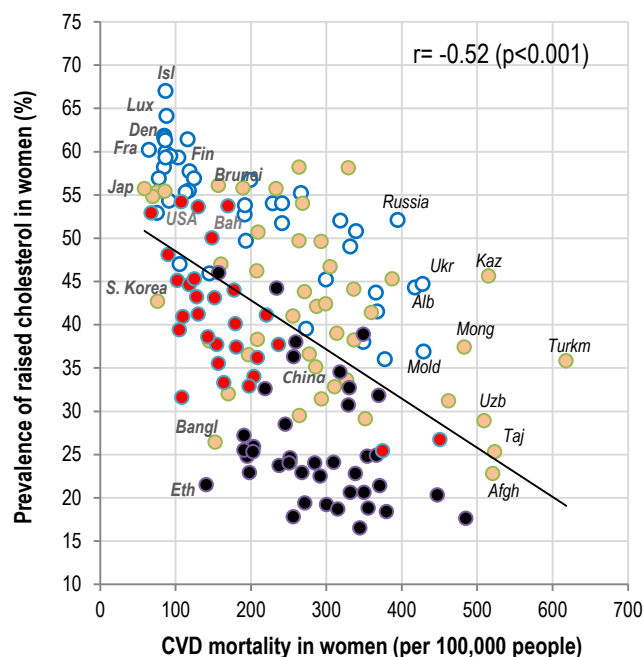

**Supplementary Fig. S22.** Relationship between women's CVD mortality (WHO, 2012) and the prevalence of women's raised cholesterol (%; WHO, 2010).

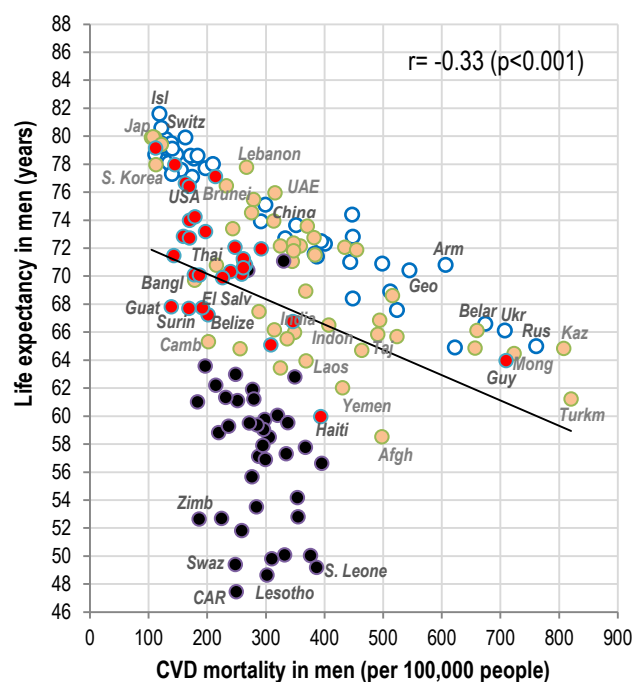

**Supplementary Fig. S23.** Relationship between men's CVD mortality (WHO, 2012) and men's life expectancy (World Bank, 2012).

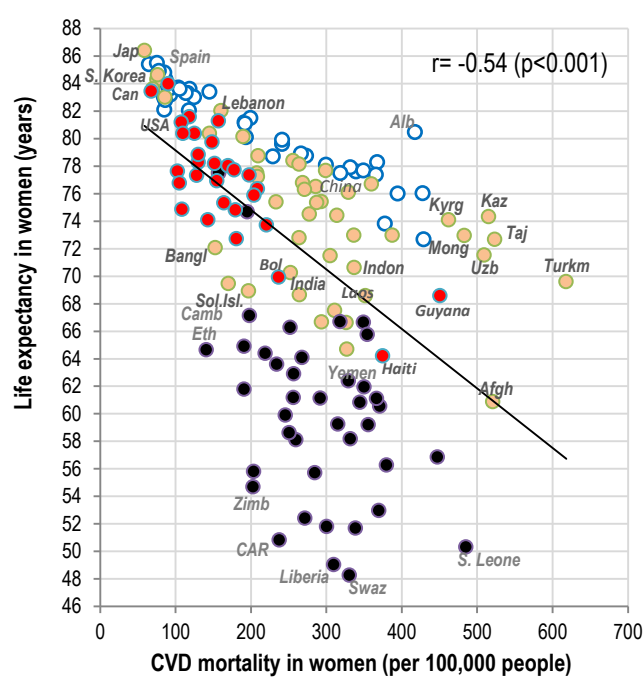

**Supplementary Fig. S24.** Relationship between women's CVD mortality (WHO, 2012) and women's life expectancy (World Bank, 2012).

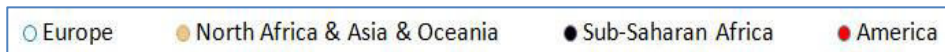

# Raised blood glucose

**Supplementary Table S7.** Relationship between raised blood glucose and the examined variables (total sample of 158 countries).

| Raised blood glucose (Men) |       |                        | Raised blood glucose (Women) |       |                        |
|----------------------------|-------|------------------------|------------------------------|-------|------------------------|
| Positive correlates        | Mean  | Correlation (p-values) | Positive correlates          | Mean  | Correlation (p-values) |
| Wheat                      | 197.0 | 0.43 (p<0.001)         | MEAN BMI                     | 25.5  | 0.62 (p<0.001)         |
| MEAN BMI                   | 24.8  | 0.40 (p<0.001)         | OBESITY (%)                  | 19.6  | 0.57 (p<0.001)         |
| OBESITY (%)                | 12.9  | 0.39 (p<0.001)         | Cereals total                | 373.7 | 0.40 (p<0.001)         |
| Cereals total              | 373.7 | 0.35 (p<0.001)         | CVD MORTALITY                | 241.7 | 0.36 (p<0.001)         |
| Tomatoes                   | 50.1  | 0.35 (p<0.001)         | % Plant food energy          | 79.8  | 0.36 (p<0.001)         |
| Plant protein              | 43.0  | 0.34 (p<0.001)         | % CC energy                  | 36.4  | 0.34 (p<0.001)         |
| Mutton & Goat meat         | 9.5   | 0.32 (p<0.001)         | Plant protein                | 43.0  | 0.33 (p<0.001)         |
| CVD MORTALITY              | 308.0 | 0.30 (p<0.001)         | Wheat                        | 197.0 | 0.31 (p<0.001)         |
| Poultry                    | 38.4  | 0.30 (p<0.001)         | % CA energy                  | 64.1  | 0.30 (p<0.001)         |
| Vegetables total           | 224.8 | 0.27 (p<0.001)         | RAISED BLOOD PRESSURE (%)    | 24.0  | 0.28 (p<0.001)         |

  

| Negative correlates          | Mean  | Correlation (p-values) | Negative correlates          | Mean   | Correlation (p-values) |
|------------------------------|-------|------------------------|------------------------------|--------|------------------------|
| % Alcoholic beverages energy | 2.6   | -0.36 (p<0.001)        | Pork                         | 33.6   | -0.54 (p<0.001)        |
| Alcoholic beverages total    | 118.8 | -0.35 (p<0.001)        | Alcoholic beverages total    | 118.8  | -0.53 (p<0.001)        |
| Pork                         | 33.6  | -0.33 (p<0.001)        | % Alcoholic beverages energy | 2.6    | -0.51 (p<0.001)        |
| Freshwater fish              | 6.7   | -0.28 (p<0.001)        | Beer                         | 77.6   | -0.44 (p<0.001)        |
| Beer                         | 77.6  | -0.26 (p=0.001)        | Coffee                       | 5.6    | -0.44 (p<0.001)        |
| Wine                         | 16.7  | -0.24 (p=0.002)        | Wine                         | 16.7   | -0.44 (p<0.001)        |
| Coffee                       | 5.6   | -0.23 (p=0.004)        | Cheese                       | 11.5   | -0.40 (p<0.001)        |
| Lard                         | 5.5   | -0.23 (p=0.004)        | HEALTH EXPENDITURE           | 1254.9 | -0.38 (p<0.001)        |
| Starchy roots total          | 201.0 | -0.22 (p=0.006)        | Lard                         | 5.5    | -0.36 (p<0.001)        |
| % SRC energy                 | 6.2   | -0.20 (p=0.011)        | Animal fat                   | 35.9   | -0.35 (p<0.001)        |

**Supplementary Table S8.** Relationship between raised blood glucose and the examined variables (the world outside Europe, 116 countries).

| Raised blood glucose (Men) |        |                        | Raised blood glucose (Women)  |        |                        |
|----------------------------|--------|------------------------|-------------------------------|--------|------------------------|
| Positive correlates        | Mean   | Correlation (p-values) | Positive correlates           | Mean   | Correlation (p-values) |
| OBESITY (%)                | 10.6   | 0.65 (p<0.001)         | OBESITY (%)                   | 19.0   | 0.72 (p<0.001)         |
| MEAN BMI                   | 24.2   | 0.63 (p<0.001)         | MEAN BMI                      | 25.4   | 0.72 (p<0.001)         |
| Wheat                      | 164.4  | 0.59 (p<0.001)         | Wheat                         | 164.4  | 0.55 (p<0.001)         |
| Tomatoes                   | 41.8   | 0.52 (p<0.001)         | Tomatoes                      | 41.8   | 0.47 (p<0.001)         |
| Total energy               | 2550.7 | 0.47 (p<0.001)         | Refined sugar                 | 59.4   | 0.40 (p<0.001)         |
| RAISED CHOLESTEROL (%)     | 32.7   | 0.45 (p<0.001)         | RAISED CHOLESTEROL (%)        | 36.0   | 0.38 (p<0.001)         |
| Vegetables total           | 191.5  | 0.44 (p<0.001)         | Total energy                  | 2550.7 | 0.36 (p<0.001)         |
| Total protein              | 68.6   | 0.43 (p<0.001)         | Grapes                        | 9.1    | 0.35 (p<0.001)         |
| Grapes                     | 9.1    | 0.40 (p<0.001)         | Cereals total                 | 377.6  | 0.34 (p<0.001)         |
| Total fat & Total protein  | 134.2  | 0.40 (p<0.001)         | Ref. sugar & sweeteners total | 71.2   | 0.33 (p<0.001)         |

  

| Negative correlates          | Mean  | Correlation (p-values) | Negative correlates          | Mean  | Correlation (p-values) |
|------------------------------|-------|------------------------|------------------------------|-------|------------------------|
| % Alcoholic beverages energy | 1.7   | -0.30 (p=0.001)        | % Alcoholic beverages energy | 1.7   | -0.31 (p<0.001)        |
| Freshwater fish              | 6.8   | -0.29 (p=0.001)        | Alcoholic beverages total    | 76.2  | -0.31 (p<0.001)        |
| % CA energy                  | 67.1  | -0.28 (p=0.002)        | Freshwater fish              | 6.8   | -0.30 (p<0.001)        |
| % SRC energy                 | 7.0   | -0.27 (p=0.004)        | Pork                         | 14.8  | -0.30 (p=0.001)        |
| Alcoholic beverages total    | 76.2  | -0.25 (p=0.007)        | % SRC energy                 | 7.0   | -0.28 (p=0.002)        |
| Maize                        | 70.8  | -0.24 (p=0.009)        | Starchy roots                | 196.4 | -0.24 (p=0.008)        |
| % CC energy & % SRC energy   | 46.7  | -0.24 (p=0.010)        | Fermented beverages          | 22.0  | -0.24 (p=0.011)        |
| Fermented beverages          | 22.0  | -0.23 (p=0.012)        | % CC energy & % SRC energy   | 46.7  | -0.18 (p=0.049)        |
| Starchy roots total          | 196.4 | -0.23 (p=0.014)        | Beer                         | 43.9  | -0.17 (p=0.07)         |
| Pork                         | 14.8  | -0.20 (p=0.029)        | Rice                         | 104.6 | -0.16 (p=0.09)         |

Level of significance:

| Positive correlates |         | Negative correlates |         |
|---------------------|---------|---------------------|---------|
| p≥0.001             | p<0.001 | p≥0.001             | p<0.001 |



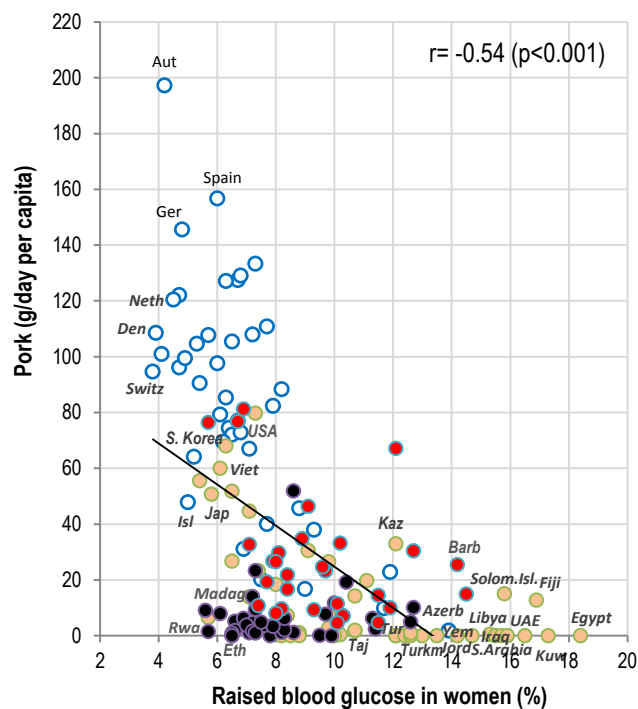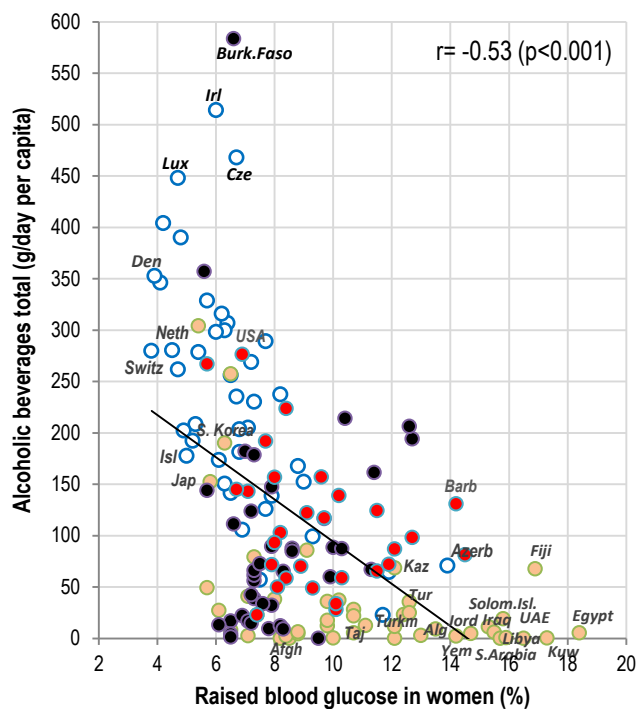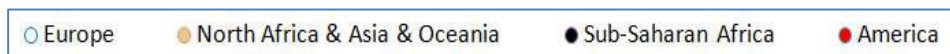

**Supplementary Fig. S25.** Relationship between the prevalence of women's raised blood glucose (%) (WHO, 2010) and the mean consumption of pork (g/day per capita; FAOSTAT, 1993-2011).

**Supplementary Fig. S26.** Relationship between the prevalence of women's raised blood glucose (%) (WHO, 2010) and the mean consumption of alcoholic beverages (g/day per capita, FAOSTAT, 1993-2011).

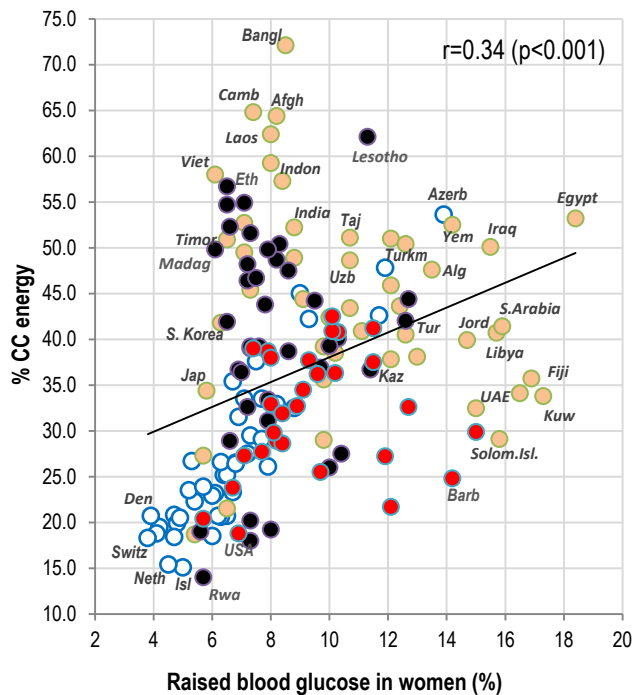

**Supplementary Fig. S27.** Relationship between the prevalence of women's raised blood glucose (%; WHO, 2010) and the mean proportion of energy from cereal carbohydrates (% CC energy) in the diet (FAOSTAT, 1993-2011).

**Total sample (n=158).**

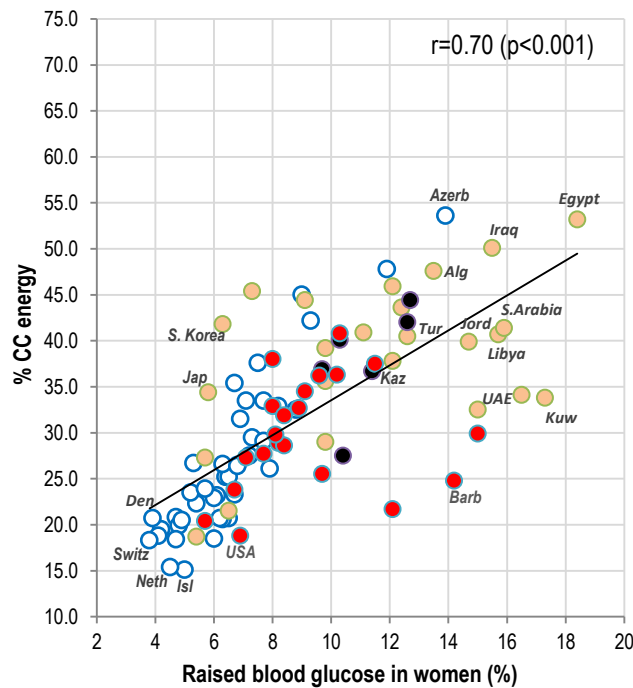

**Supplementary Fig. S28.** Relationship between the prevalence of women's raised blood glucose (%; WHO, 2010) and the mean proportion of energy from cereal carbohydrates (% CC energy) in the diet (FAOSTAT, 1993-2011).

**Countries with health expenditure above 500 USD (n=92).**

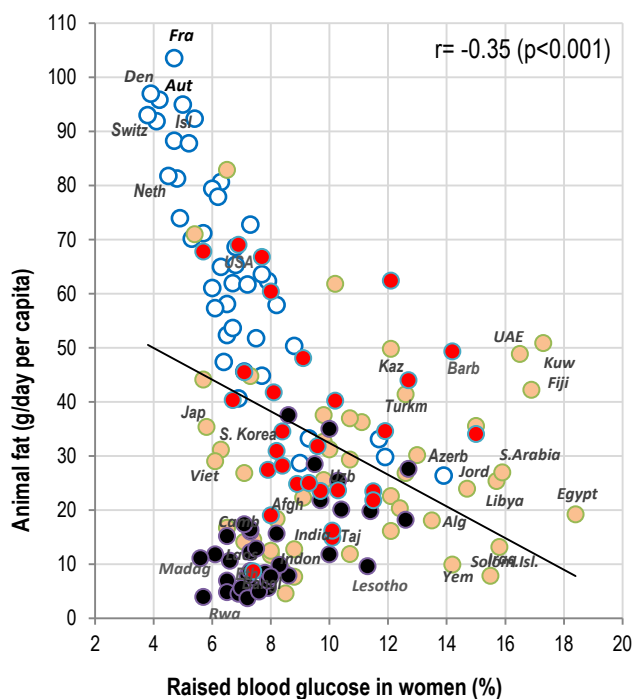

**Supplementary Fig. S29.** Relationship between the prevalence of women's raised blood glucose (%; WHO, 2010) and the mean consumption of animal fat (g/day per capita; FAOSTAT, 1993-2011).

**Total sample (n=158).**

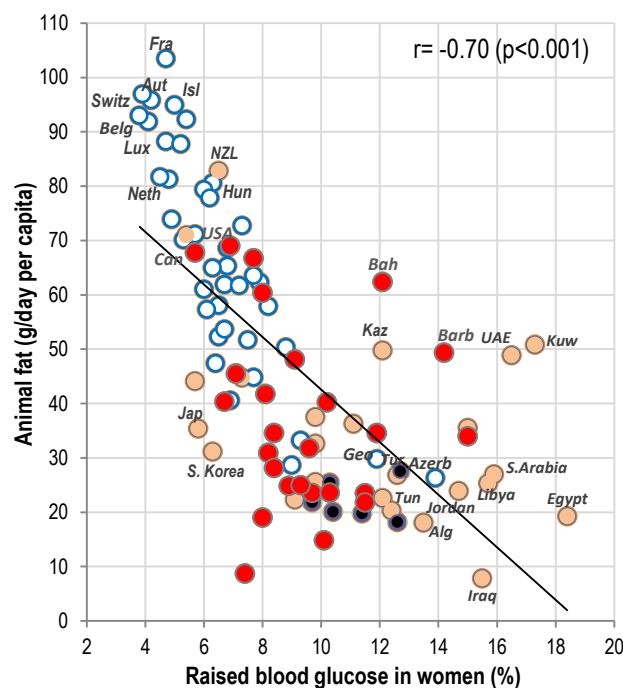

**Supplementary Fig. S30.** Relationship between the prevalence of women's raised blood glucose (%; WHO, 2010) and the mean consumption of animal fat (g/day per capita; FAOSTAT, 1993-2011).

**Countries with health expenditure above 500 USD (n=92).**

○ Europe    ● North Africa & Asia & Oceania    ● Sub-Saharan Africa    ● America



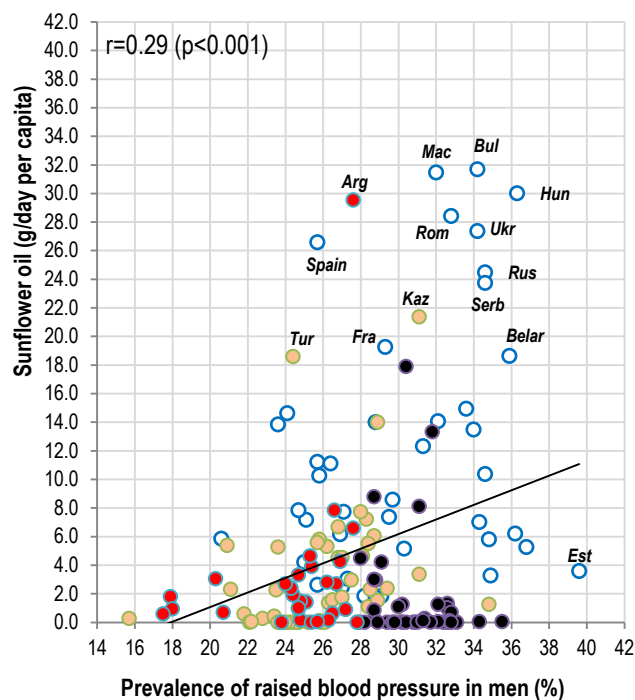

**Supplementary Fig. S31.** Relationship between the prevalence of men's raised blood pressure (%; WHO, 2010) and the mean consumption of sunflower oil (FAOSTAT, 1993-2011).

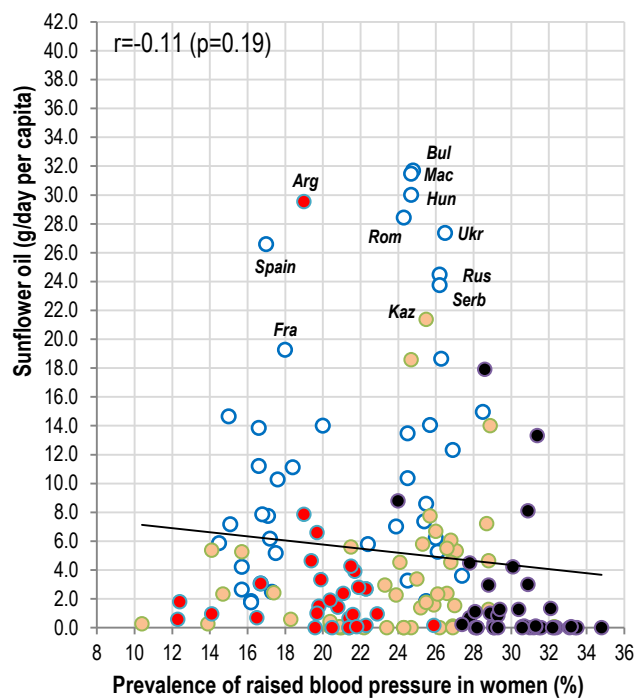

**Supplementary Fig. S32.** Relationship between the prevalence of women's raised blood pressure (%; WHO, 2010) and the mean consumption of sunflower oil (FAOSTAT, 1993-2011).

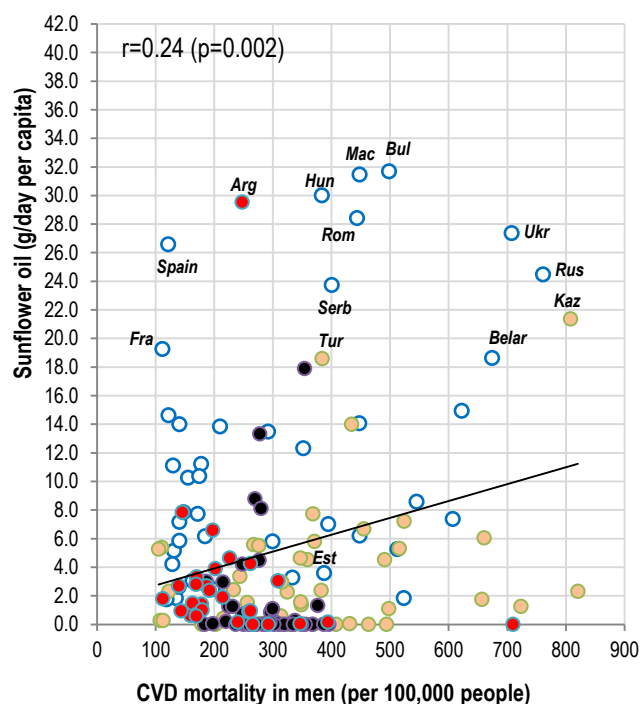

**Supplementary Fig. S33.** Relationship between men's CVD mortality (WHO, 2012) and the mean consumption of sunflower oil (FAOSTAT, 1993-2011).

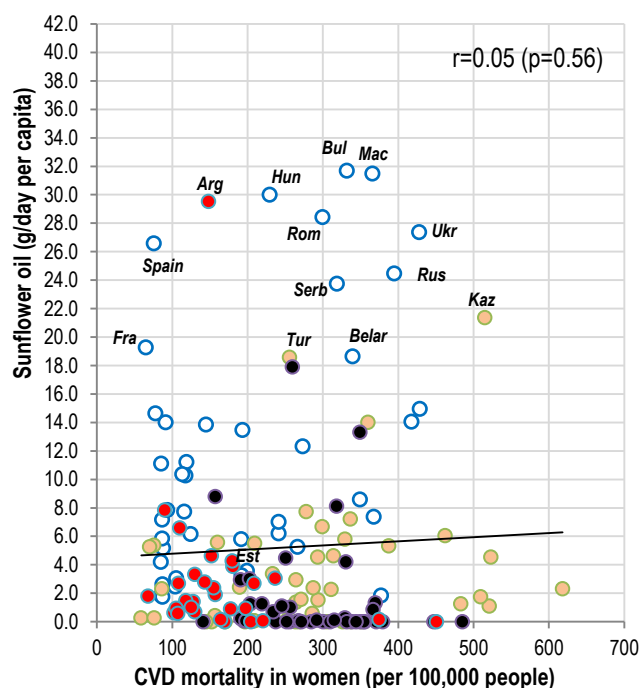

**Supplementary Fig. S34.** Relationship between women's CVD mortality (WHO, 2012) and the mean consumption of sunflower oil (FAOSTAT, 1993-2011).

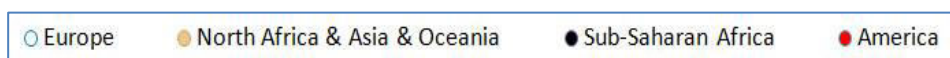

# Smoking

**Supplementary Table S9.** Correlation between smoking and health indicators. All countries (n=115).

|                               | Current smoking of any tobacco product |       | Daily smoking of any tobacco product |       | Current smoking of cigarettes |       | Daily smoking of cigarettes |       |
|-------------------------------|----------------------------------------|-------|--------------------------------------|-------|-------------------------------|-------|-----------------------------|-------|
|                               | Men                                    | Women | Men                                  | Women | Men                           | Women | Men                         | Women |
| Raised blood pressure (Men)   | 0.17                                   |       | 0.18                                 |       | 0.11                          |       | 0.13                        |       |
| Raised blood pressure (Women) |                                        | -0.42 |                                      | -0.43 |                               | -0.49 |                             | -0.48 |
| CVD mortality (Men)           | 0.53                                   |       | 0.52                                 |       | 0.52                          |       | 0.50                        |       |
| CVD mortality (Women)         |                                        | -0.37 |                                      | -0.38 |                               | -0.40 |                             | -0.40 |
| Raised cholesterol (Men)      | -0.03                                  |       | 0.01                                 |       | 0.09                          |       | 0.13                        |       |
| Raised cholesterol (Women)    |                                        | 0.62  |                                      | 0.63  |                               | 0.67  |                             | 0.66  |
| Raised blood glucose (Men)    | 0.19                                   |       | 0.19                                 |       | 0.17                          |       | 0.13                        |       |
| Raised blood glucose (Women)  |                                        | -0.44 |                                      | -0.46 |                               | -0.43 |                             | -0.47 |
| Health expenditure            | -0.26                                  | 0.55  | -0.23                                | 0.57  | -0.16                         | 0.59  | -0.13                       | 0.60  |
| Life expectancy               | -0.07                                  | 0.57  | -0.04                                | 0.58  | 0.04                          | 0.63  | 0.06                        | 0.61  |

**Supplementary Table S10.** Correlation between smoking and health indicators. Non-European countries (n=76).

|                               | Current smoking of any tobacco product |       | Daily smoking of any tobacco product |       | Current smoking of cigarettes |       | Daily smoking of cigarettes |       |
|-------------------------------|----------------------------------------|-------|--------------------------------------|-------|-------------------------------|-------|-----------------------------|-------|
|                               | Men                                    | Women | Men                                  | Women | Men                           | Women | Men                         | Women |
| Raised blood pressure (Men)   | -0.05                                  |       | -0.07                                |       | -0.17                         |       | -0.19                       |       |
| Raised blood pressure (Women) |                                        | -0.44 |                                      | -0.46 |                               | -0.56 |                             | -0.57 |
| CVD mortality (Men)           | 0.36                                   |       | 0.34                                 |       | 0.32                          |       | 0.29                        |       |
| CVD mortality (Women)         |                                        | -0.35 |                                      | -0.36 |                               | -0.42 |                             | -0.42 |
| Raised cholesterol (Men)      | 0.06                                   |       | 0.06                                 |       | 0.20                          |       | 0.18                        |       |
| Raised cholesterol (Women)    |                                        | 0.41  |                                      | 0.41  |                               | 0.51  |                             | 0.49  |
| Raised blood glucose (Men)    | 0.15                                   |       | 0.17                                 |       | 0.15                          |       | 0.12                        |       |
| Raised blood glucose (Women)  |                                        | -0.13 |                                      | -0.15 |                               | -0.11 |                             | -0.18 |
| Health expenditure            | -0.17                                  | 0.44  | -0.14                                | 0.48  | -0.05                         | 0.52  | -0.03                       | 0.58  |
| Life expectancy               | 0.01                                   | 0.43  | 0.02                                 | 0.44  | 0.13                          | 0.55  | 0.12                        | 0.52  |

Level of significance:

| Positive correlates |        |         | Negative correlates |        |         |
|---------------------|--------|---------|---------------------|--------|---------|
| p<0.05              | p<0.01 | p<0.001 | p<0.05              | p<0.01 | p<0.001 |

**Supplementary Table S11.** Relationship between men's raised blood pressure & CVD mortality and the examined variables plus smoking (46 countries with health expenditure 500-2000 USD per capita).

| Raised blood pressure (Men)    |       |                        | CVD mortality (Men)                        |       |                        |
|--------------------------------|-------|------------------------|--------------------------------------------|-------|------------------------|
| Positive correlates            | Mean  | Correlation (p-values) | Positive correlates                        | Mean  | Correlation (p-values) |
| Potatoes                       | 137.7 | 0.71 (p<0.001)         | Daily smoking of cigarettes (%)            | 25.6  | 0.68 (p<0.001)         |
| % Alcoholic beverages energy   | 3.1   | 0.68 (p<0.001)         | Daily smoking of any tobacco product (%)   | 29.7  | 0.67 (p<0.001)         |
| Dairy total                    | 352.6 | 0.65 (p<0.001)         | Current smoking of cigarettes (%)          | 31.5  | 0.66 (p<0.001)         |
| Alcoholic beverages total      | 121.1 | 0.65 (p<0.001)         | Current smoking of any tobacco product (%) | 37.0  | 0.64 (p<0.001)         |
| Dairy protein                  | 11.8  | 0.63 (p<0.001)         | Potatoes                                   | 137.7 | 0.63 (p<0.001)         |
| CVD MORTALITY                  | 358.0 | 0.61 (p<0.001)         | RAISED BLOOD PRESSURE (%)                  | 29.2  | 0.61 (p<0.001)         |
| Beer                           | 87.0  | 0.61 (p<0.001)         | Sunflower oil                              | 9.6   | 0.56 (p<0.001)         |
| Pork                           | 37.8  | 0.57 (p<0.001)         | Wheat                                      | 245.4 | 0.56 (p<0.001)         |
| Animal fat                     | 41.0  | 0.57 (p<0.001)         | Cereals total                              | 398.0 | 0.48 (p<0.001)         |
| Dairy fat                      | 11.1  | 0.57 (p<0.001)         | Starchy roots                              | 174.4 | 0.43 (p=0.003)         |
| ...Sunflower oil               | 9.6   | 0.55 (p<0.001)         | ...Distilled beverages                     | 11.5  | 0.31 (p=0.038)         |
| ...Distilled beverages         | 11.5  | 0.50 (p<0.001)         |                                            |       |                        |
| ...Daily smoking of cigarettes | 25.6  | 0.46 (p=0.001)         |                                            |       |                        |
| Negative correlates            | Mean  | Correlation (p-values) | Negative correlates                        | Mean  | Correlation (p-values) |
| Rice                           | 63.3  | -0.67 (p<0.001)        | Fruits total                               | 223.7 | -0.53 (p<0.001)        |
| % Plant food energy            | 76.8  | -0.62 (p<0.001)        | Legumes (incl. Soybeans)                   | 15.5  | -0.49 (p<0.001)        |
| Fruits total                   | 223.7 | -0.54 (p<0.001)        | Legumes (excl. Soybeans)                   | 14.2  | -0.46 (p=0.001)        |
| Oilcrops                       | 11.6  | -0.52 (p<0.001)        | Oranges. Mandarins                         | 39.8  | -0.45 (p=0.002)        |
| Legumes (incl. Soybeans)       | 15.5  | -0.47 (p<0.001)        | Rice                                       | 63.3  | -0.43 (p=0.003)        |
| Oranges. Mandarins             | 39.8  | -0.44 (p=0.002)        | Poultry                                    | 49.1  | -0.42 (p=0.004)        |
| Legumes (excl. Soybeans)       | 14.2  | -0.41 (p=0.005)        | Oilcrops                                   | 11.6  | -0.38 (p=0.009)        |
| % CA energy                    | 63.0  | -0.31 (p=0.037)        | LIFE EXPECTANCY                            | 70.6  | -0.37 (p=0.011)        |
| % CC energy                    | 35.1  | -0.31 (p=0.037)        | Ref. sugar & sweeteners total              | 97.2  | -0.25 (p=0.10)         |
| LIFE EXPECTANCY                | 70.6  | -0.31 (p=0.038)        | Refined sugar                              | 80.7  | -0.21 (p=0.16)         |

Level of significance:

| Positive correlates |         | Negative correlates |         |
|---------------------|---------|---------------------|---------|
| p≥0.001             | p<0.001 | p≥0.001             | p<0.001 |

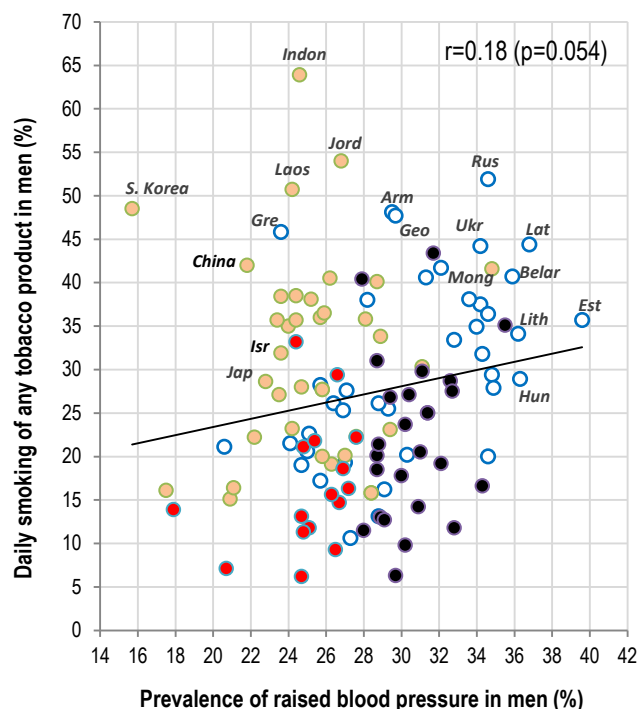

**Supplementary Fig. S35.** Relationship between the prevalence of men's raised blood pressure (WHO, 2008) and the prevalence of daily smoking of any tobacco product in men.

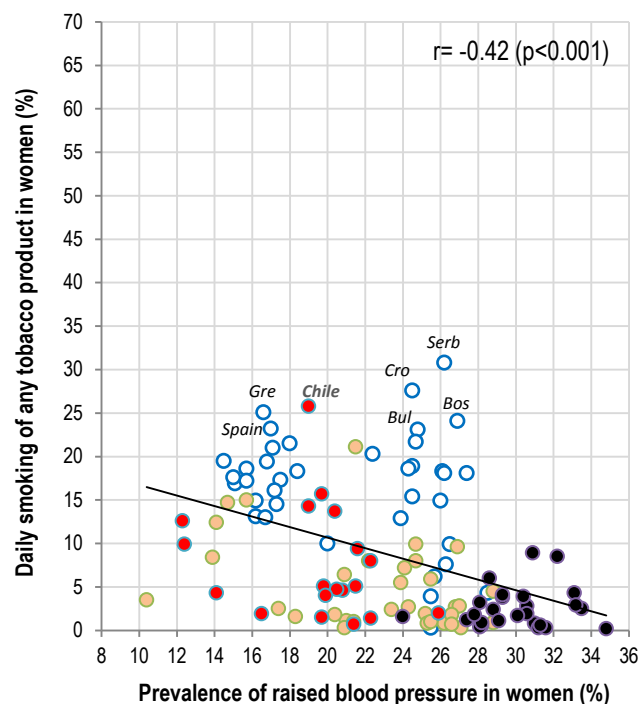

**Supplementary Fig. S36.** Relationship between the prevalence of women's raised blood pressure (WHO, 2008) and the prevalence of daily smoking of any tobacco product in women.

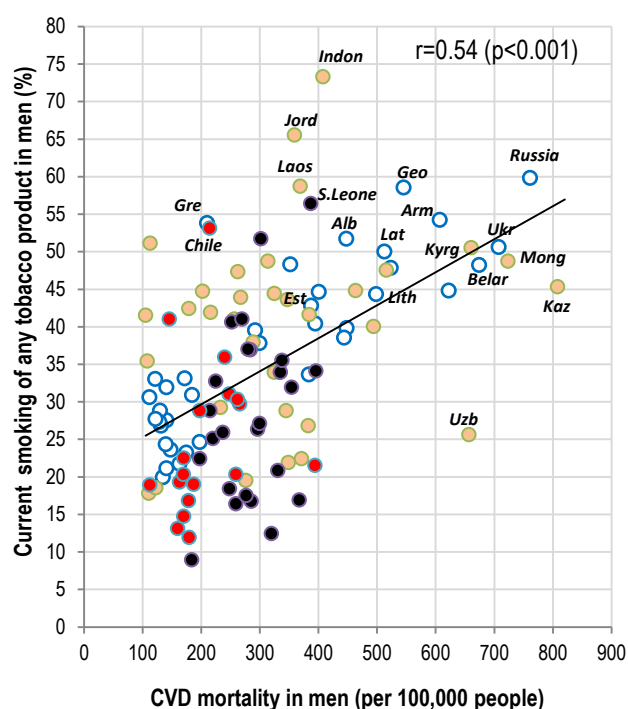

**Supplementary Fig. S37.** Relationship between the prevalence of men's CVD mortality (WHO, 2012) and the prevalence of current smoking of any tobacco product in men.

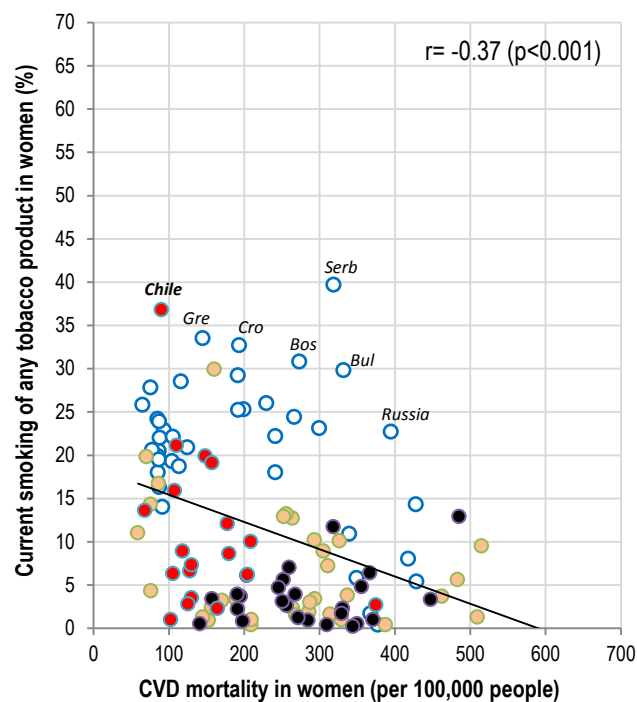

**Supplementary Fig. S38.** Relationship between the prevalence of women's CVD mortality (WHO, 2012) and the prevalence of current smoking of any tobacco product in women.

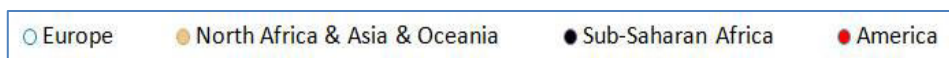

# Physical activity

**Supplementary Table S12.** Correlation between physical activity and health indicators in 123 countries.

|                               | % Insufficiently active adults |       |               |       |                               |       |
|-------------------------------|--------------------------------|-------|---------------|-------|-------------------------------|-------|
|                               | Total sample (n=123)           |       | Europe (n=35) |       | Non-European countries (n=88) |       |
|                               | Men                            | Women | Men           | Women | Men                           | Women |
| Raised blood pressure (Men)   | -0.17                          |       | -0.50         |       | -0.08                         |       |
| Raised blood pressure (Women) |                                | -0.26 |               | -0.55 |                               | -0.27 |
| CVD mortality (Men)           | -0.18                          |       | -0.55         |       | -0.07                         |       |
| CVD mortality (Women)         |                                | -0.25 |               | -0.53 |                               | -0.23 |
| Raised cholesterol (Men)      | 0.31                           |       | 0.43          |       | 0.46                          |       |
| Raised cholesterol (Women)    |                                | 0.31  |               | 0.43  |                               | 0.48  |
| Raised blood glucose (Men)    | 0.45                           |       | -0.09         |       | 0.52                          |       |
| Raised blood glucose (Women)  |                                | 0.35  |               | -0.40 |                               | 0.46  |

Level of significance:

| Positive correlates |        |         | Negative correlates |        |         |
|---------------------|--------|---------|---------------------|--------|---------|
| p<0.05              | p<0.01 | p<0.001 | p<0.05              | p<0.01 | p<0.001 |

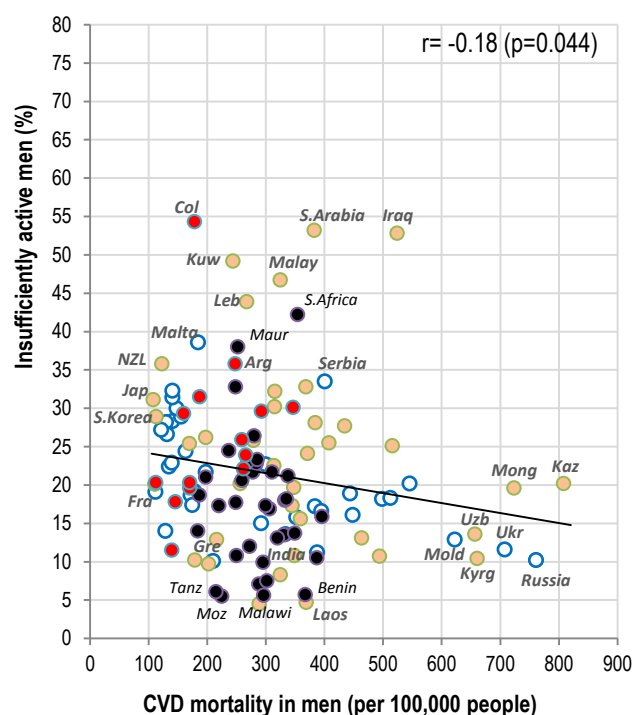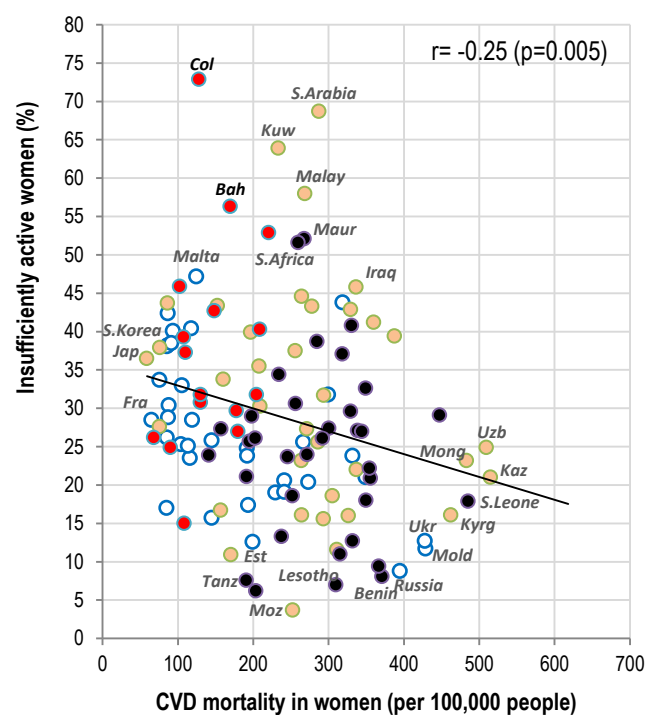

○ Europe    ● North Africa & Asia & Oceania    ● Sub-Saharan Africa    ● America

**Supplementary Fig. S39.** Relationship between the self-reported prevalence of physical activity (WHO, 2010) and men's CVD mortality (WHO, 2012).

**Supplementary Fig. S40.** Correlation between the self-reported prevalence of physical activity and women's CVD mortality (WHO, 2012).

# Factor analyses

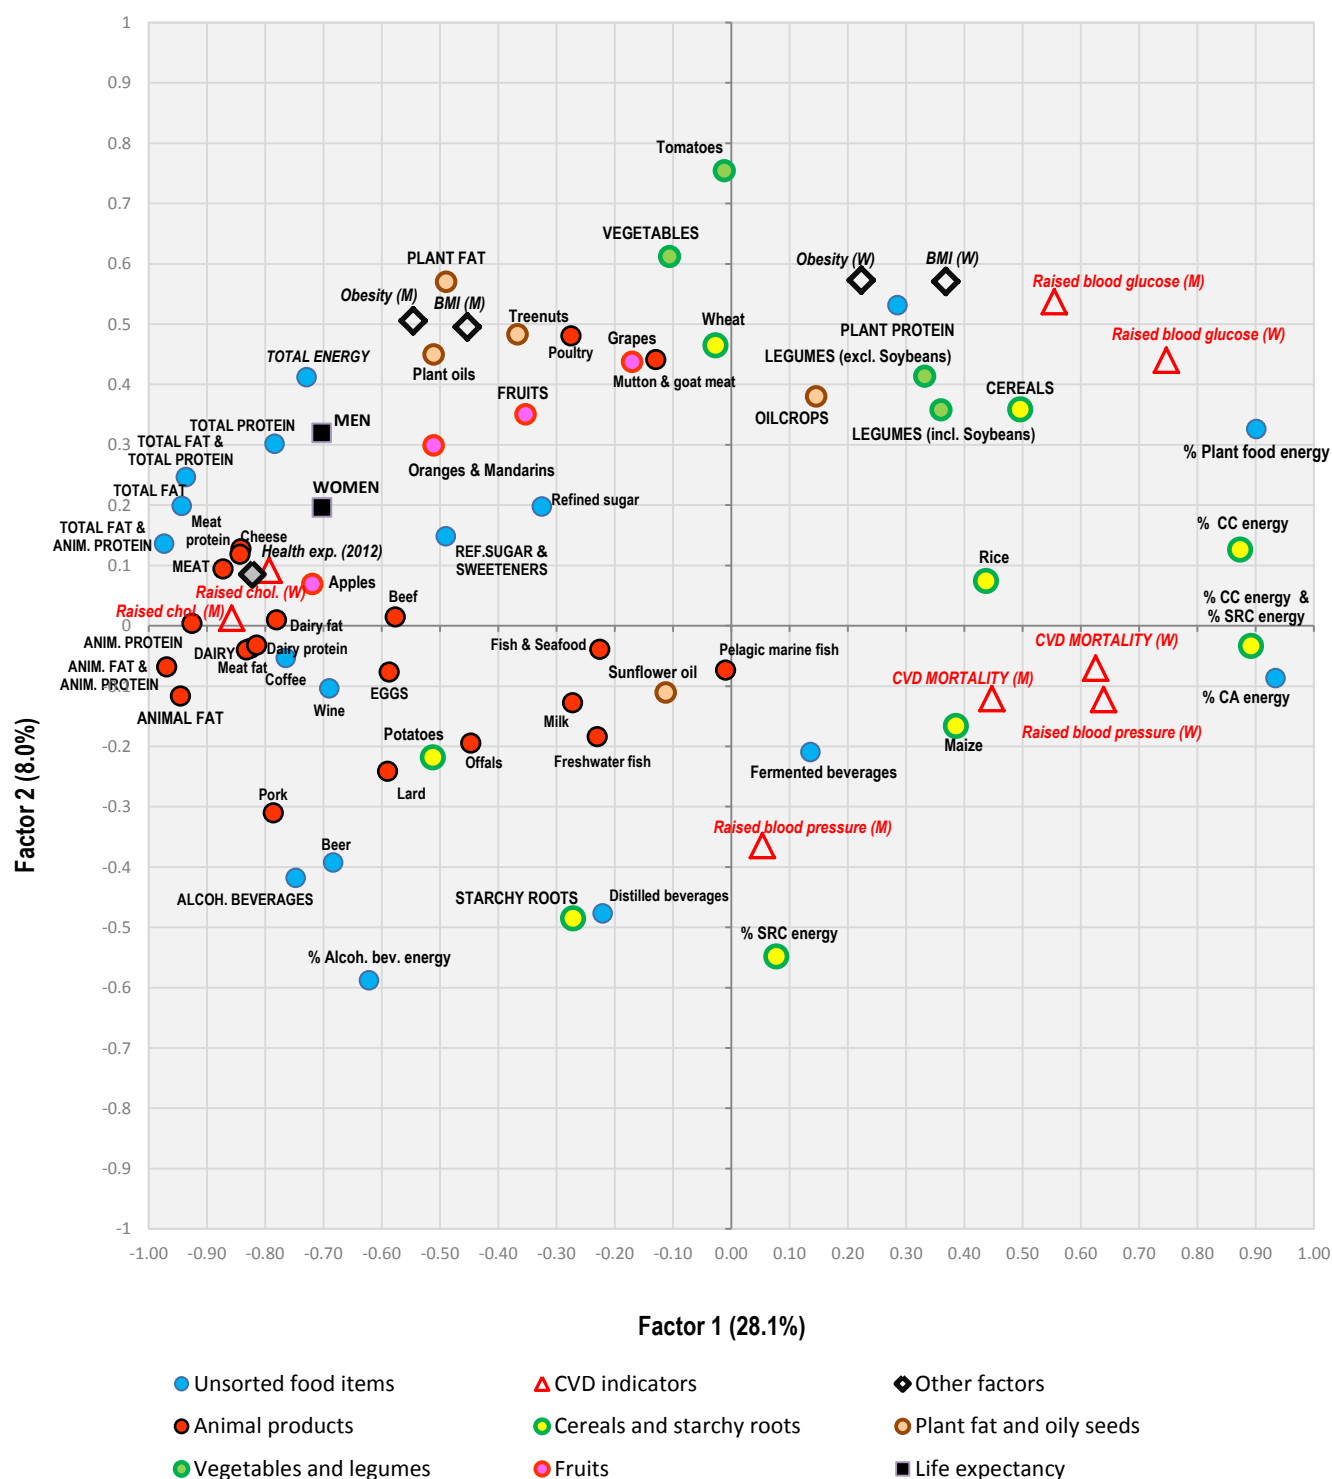

**Supplementary Fig. S41.** Factor analysis including 74 variables in 92 countries with health expenditure above 500 USD per capita explaining 36.1% variability.

**Abbreviations:** % CC energy = the proportion of energy from cereal carbohydrates; % SRC energy = the proportion of energy from starchy roots; % CA energy = the proportion of energy from carbohydrates and alcohol.

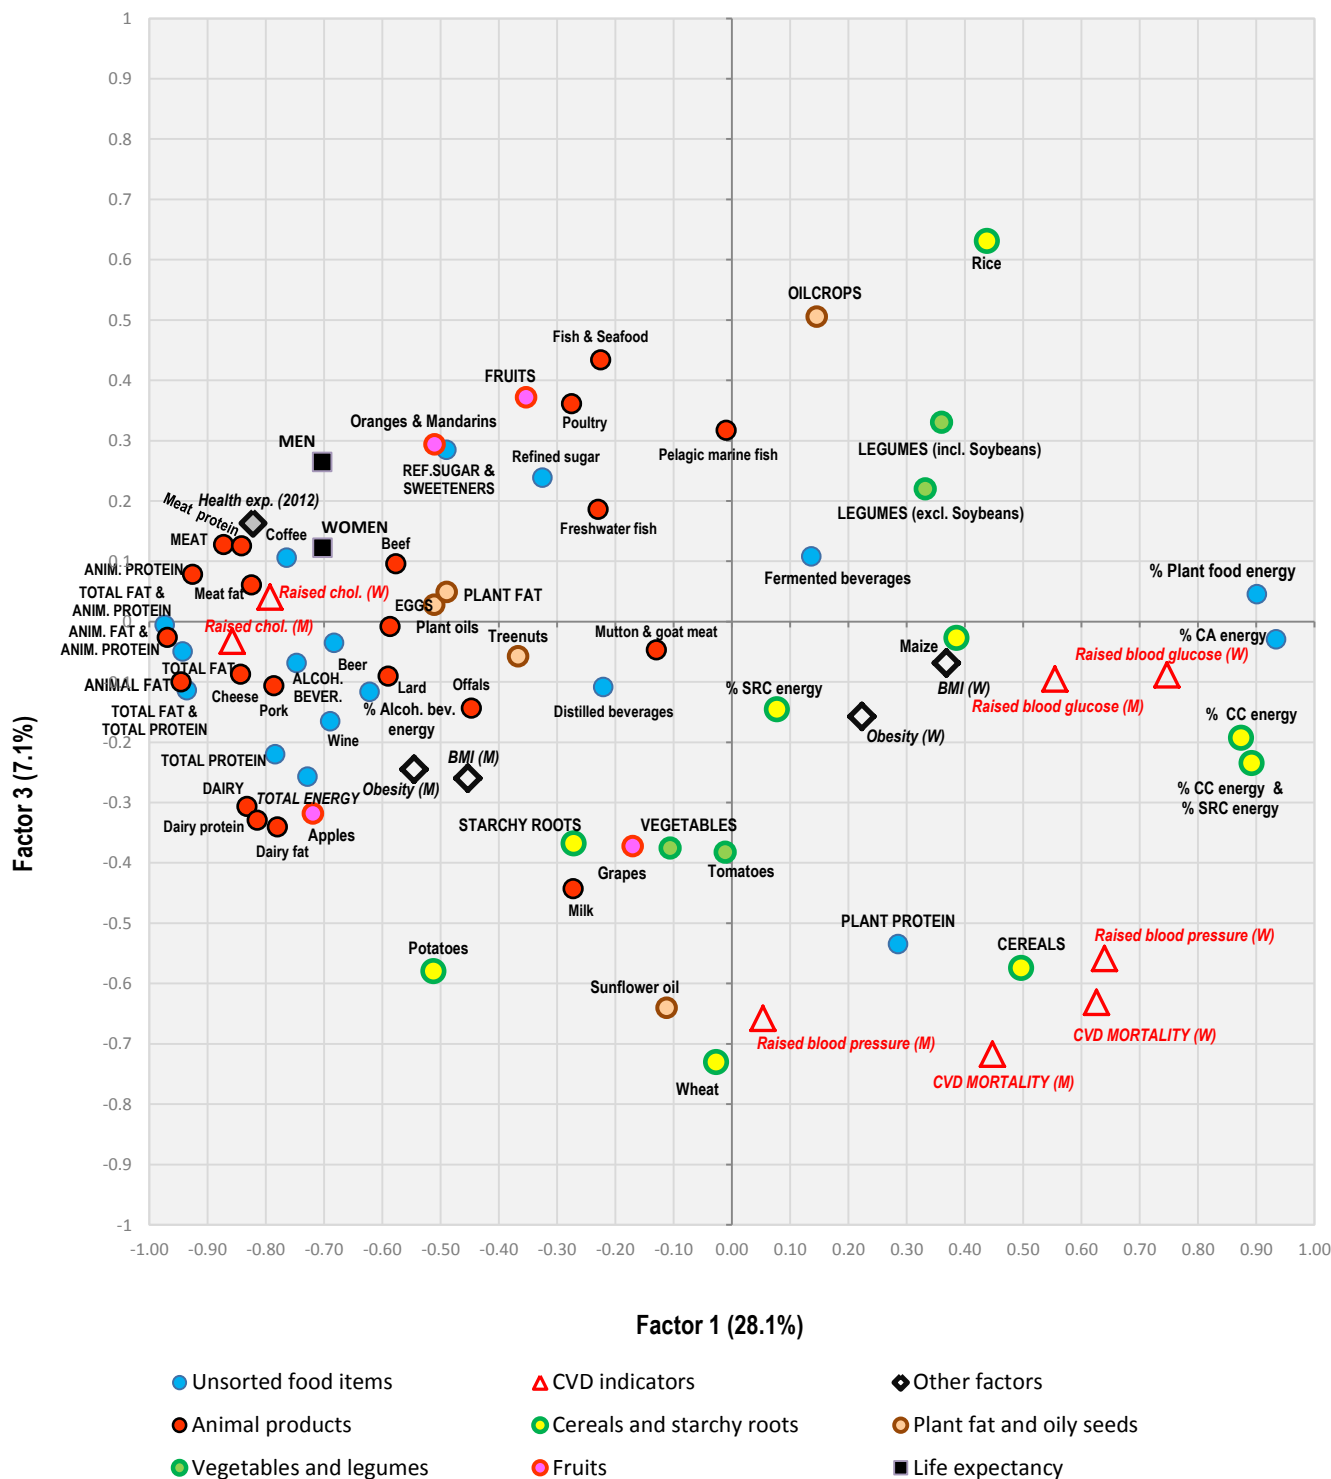

**Supplementary Fig. S42.** Factor analysis including 74 variables in 92 countries with health expenditure above 500 USD per capita explaining 35.2% variability.

**Abbreviations:** % CC energy = the proportion of energy from cereal carbohydrates; % SRC energy = the proportion of energy from starchy roots; % CA energy = the proportion of energy from carbohydrates and alcohol.

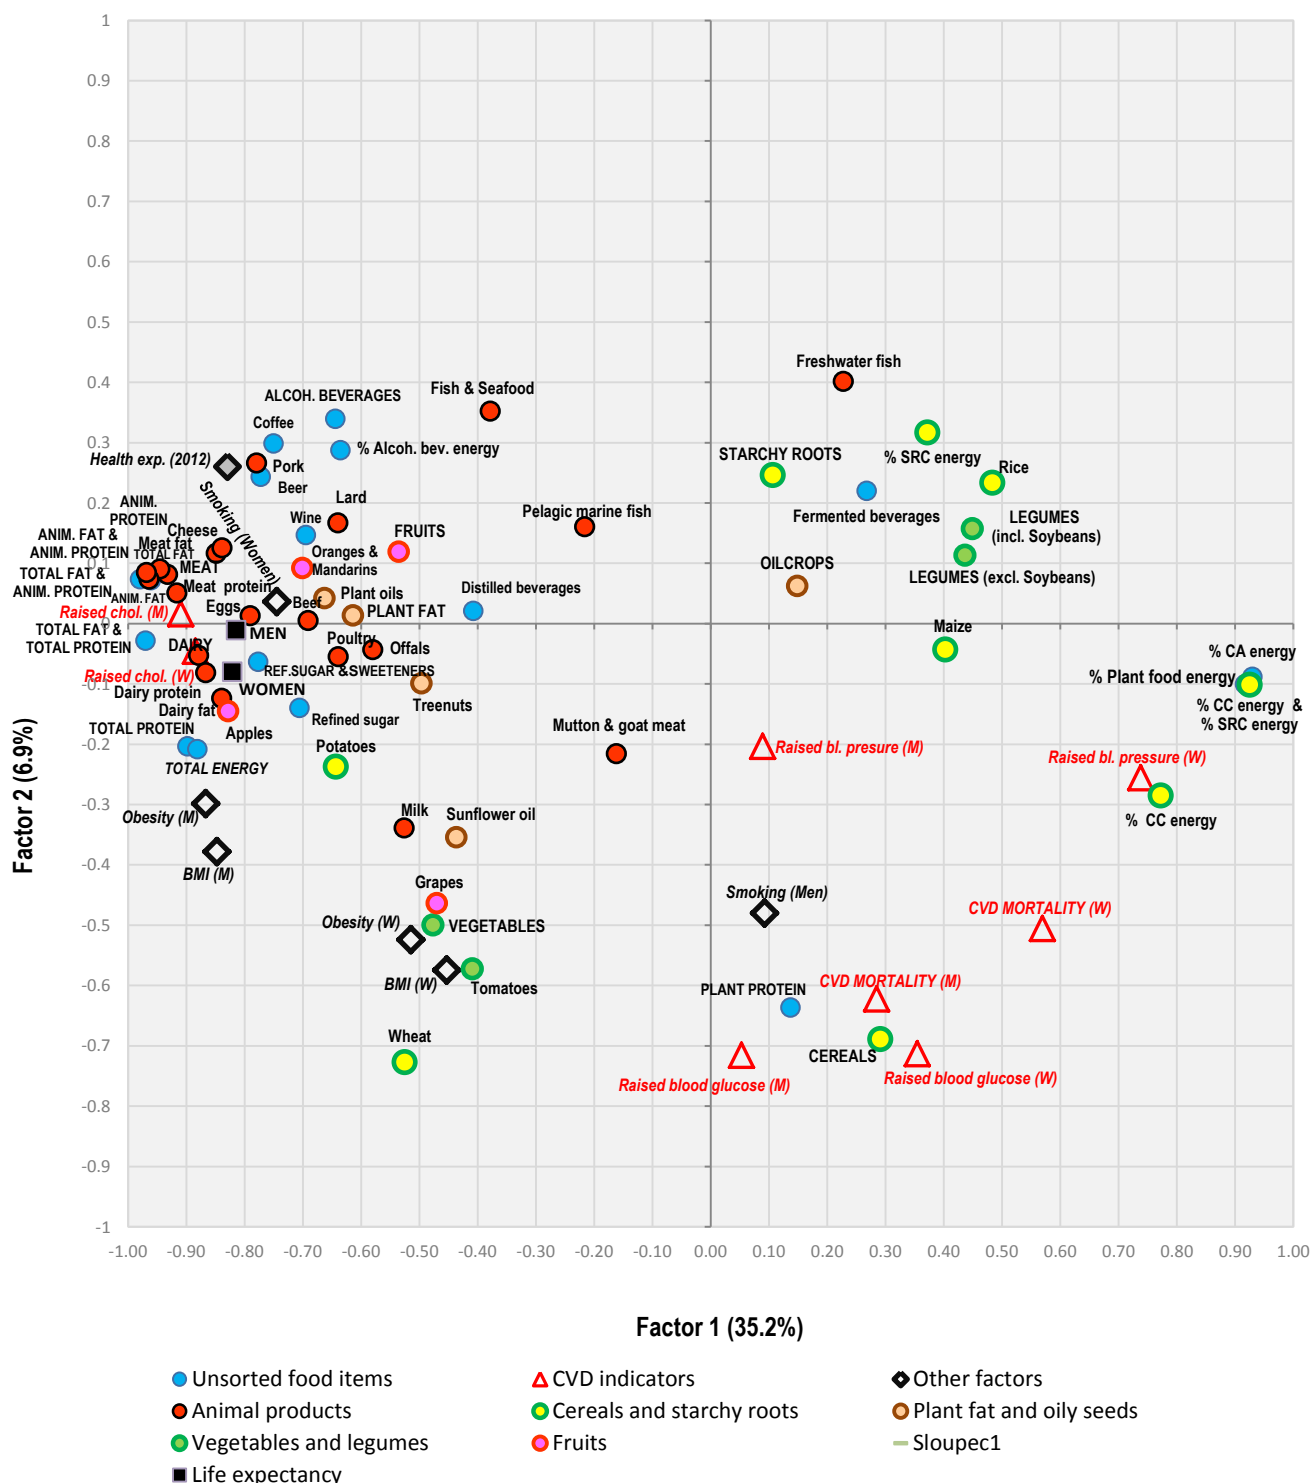

**Supplementary Fig. S43.** Factor analysis including 75 variables (plus smoking) in 115 countries explaining 42.1% variability). Smoking in this plot represents 'Current smoking of any tobacco product'.

**Abbreviations:** % CC energy = the proportion of energy from cereal carbohydrates; % SRC energy = the proportion of energy from starchy roots; % CA energy = the proportion of energy from carbohydrates and alcohol.



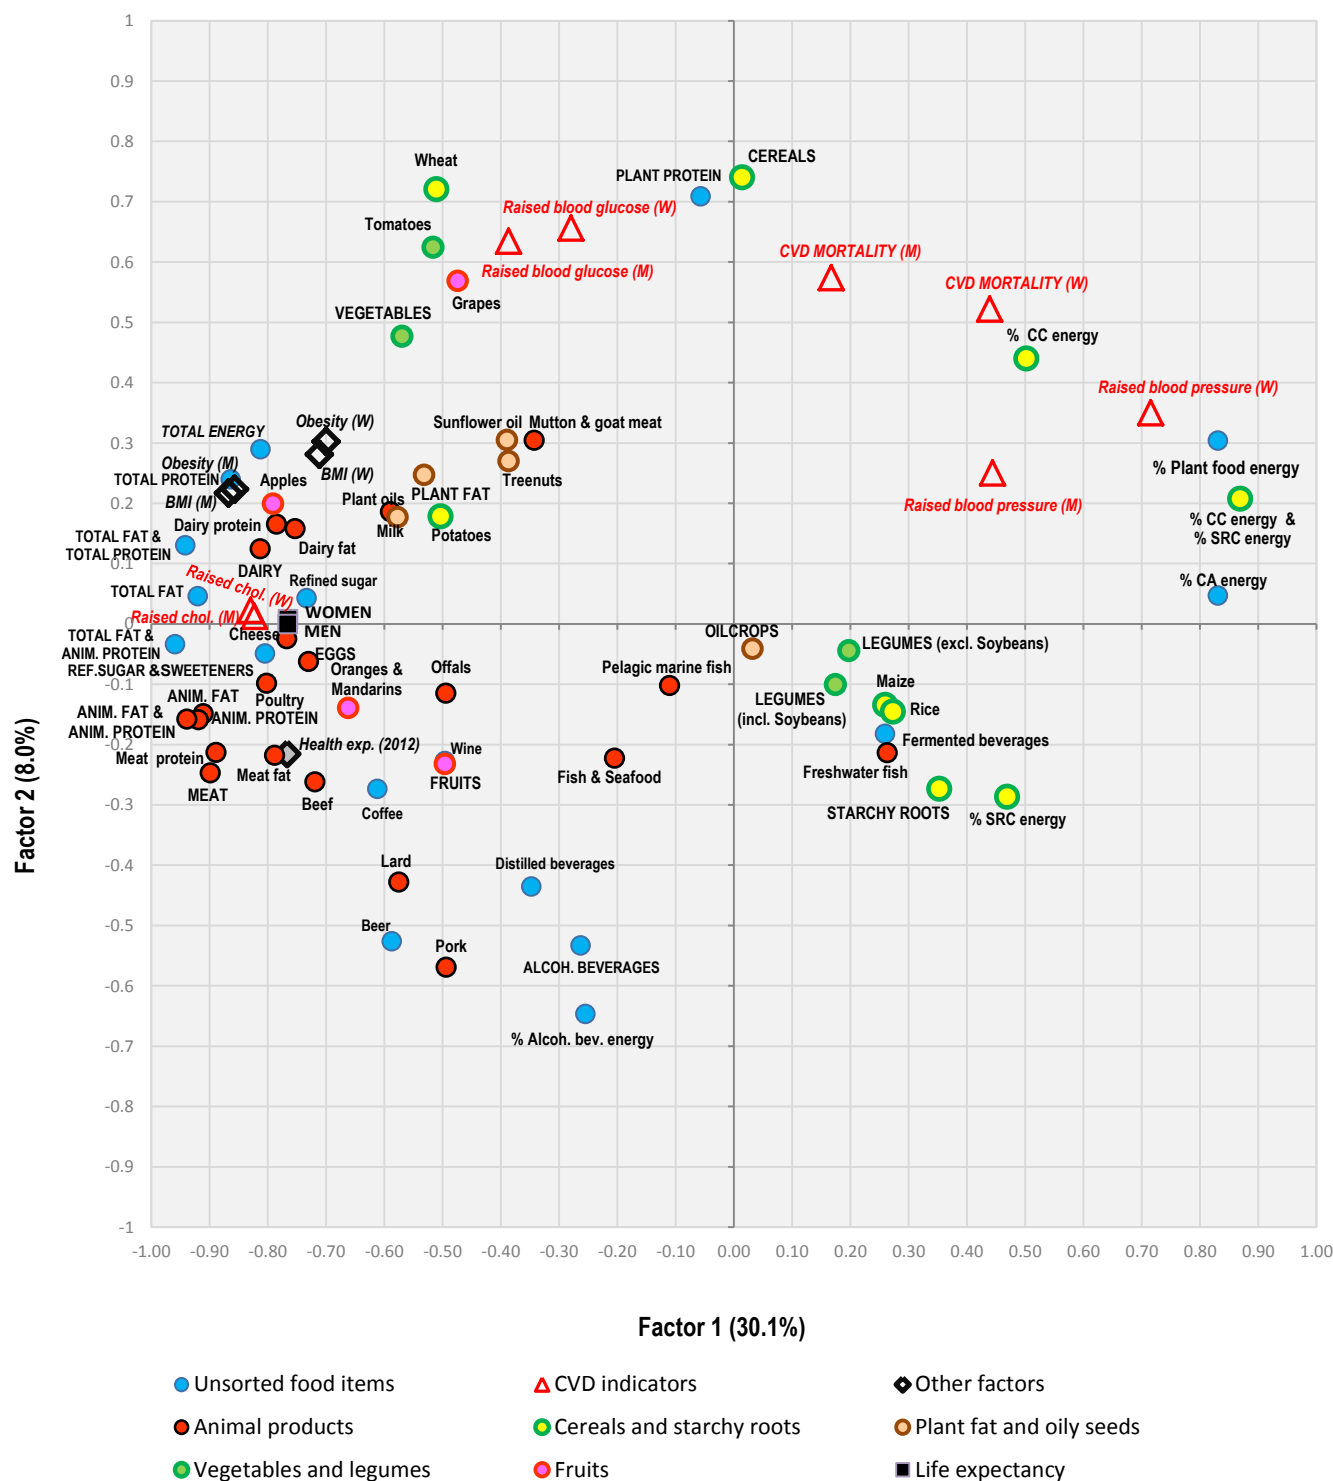

**Supplementary Fig. S44.** Factor analysis including 74 variables in 116 non-European countries explaining 38.1% variability.

**Abbreviations:** % CC energy = the proportion of energy from cereal carbohydrates; % SRC energy = the proportion of energy from starchy roots; % CA energy = the proportion of energy from carbohydrates and alcohol.

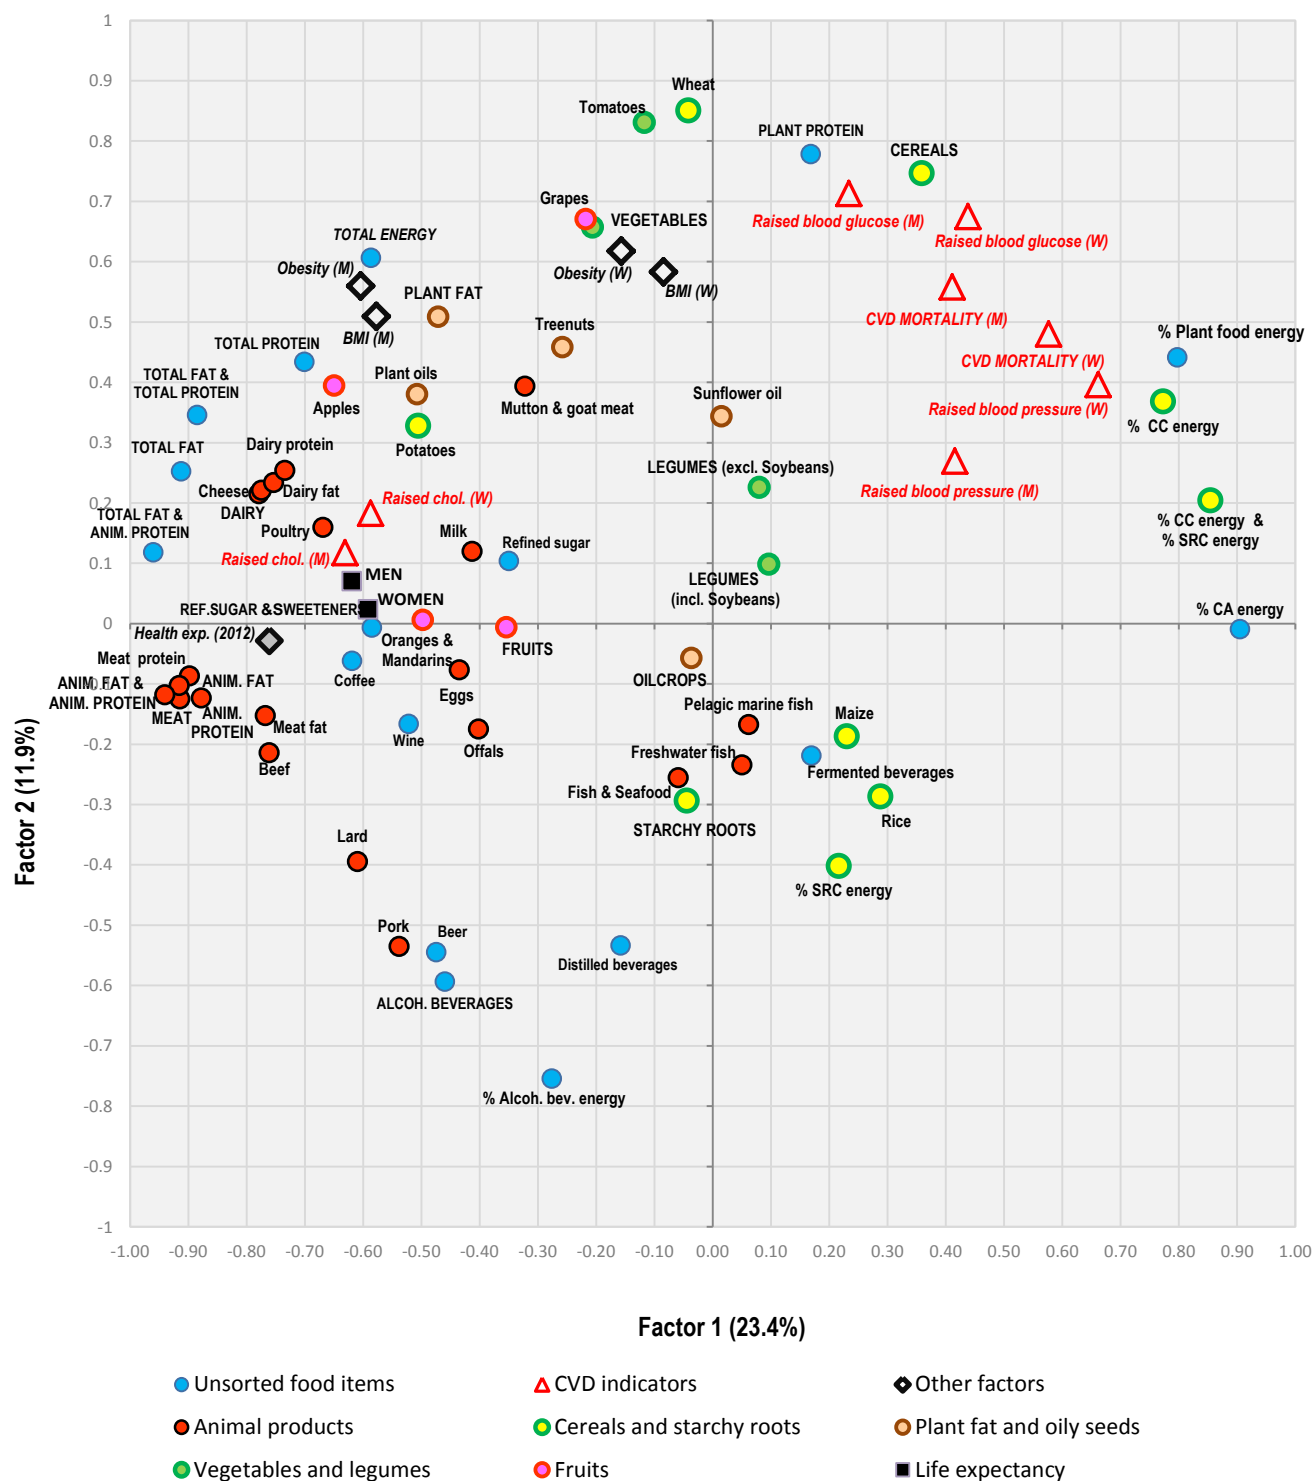

**Supplementary Fig. S45.** Factor analysis including 74 variables in 51 non-European countries with health expenditure above 500 USD per capita explaining 35.3% variability.

**Abbreviations:** % CC energy = the proportion of energy from cereal carbohydrates; % SRC energy = the proportion of energy from starchy roots; % CA energy = the proportion of energy from carbohydrates and alcohol.

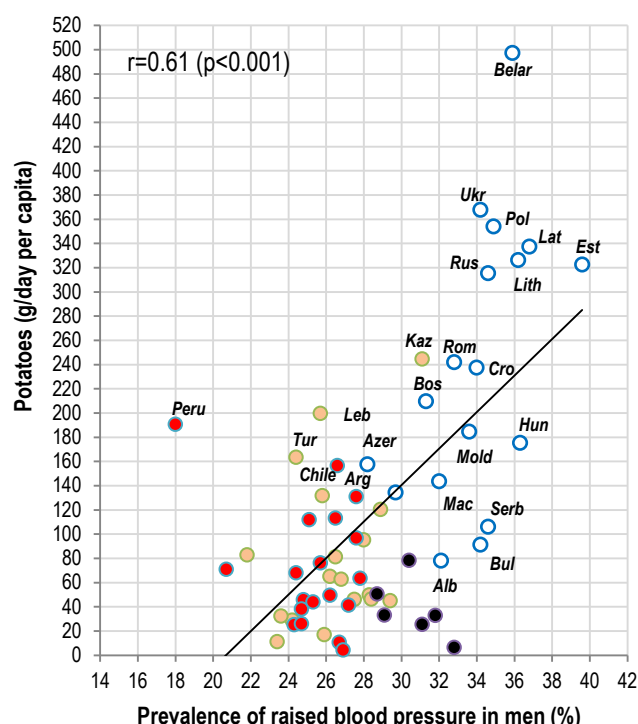

**Supplementary Fig. S46.** Relationship between the prevalence of men's raised blood pressure (%; WHO, 2010) and the mean consumption of potatoes (FAOSTAT, 1993-2011).

**Countries with health expenditure between 500-2000 USD per capita (n=61).**

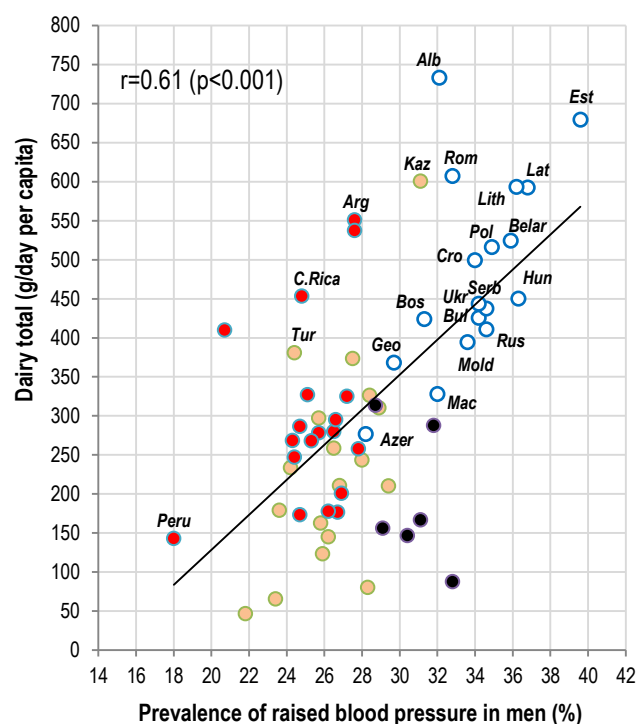

**Supplementary Fig. S47.** Relationship between the prevalence of women's raised blood pressure (%; WHO, 2010) and the mean consumption of dairy (FAOSTAT, 1993-2011).

**Countries with health expenditure between 500-2000 USD per capita (n=61).**

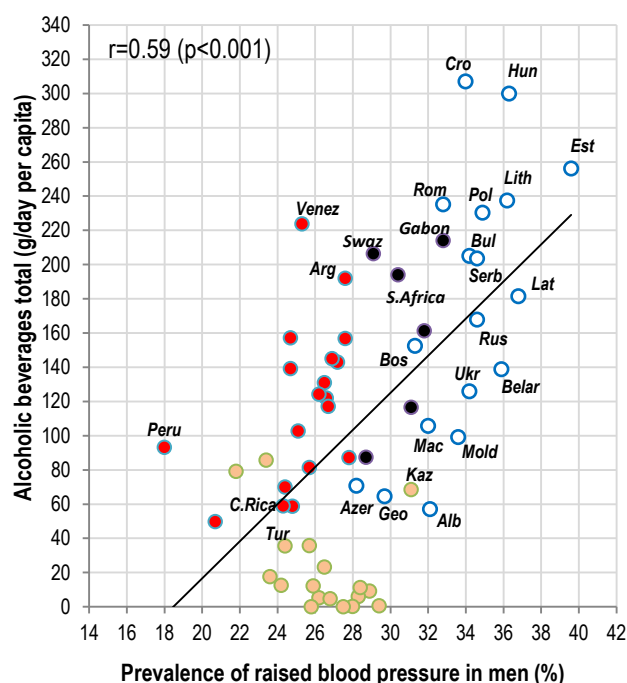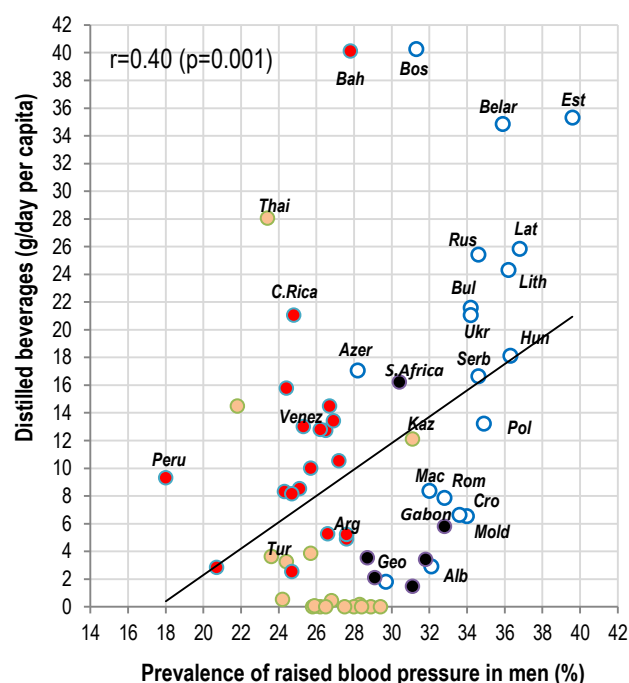

○ Europe    ● North Africa & Asia & Oceania    ● Sub-Saharan Africa    ● America

**Supplementary Fig. S48.** Relationship between men's CVD mortality (WHO, 2012) and the mean consumption of alcoholic beverages (FAOSTAT, 1993-2011).

**Countries with health expenditure between 500-2000 USD per capita (n=61).**

**Supplementary Fig. S49.** Relationship between women's CVD mortality (WHO, 2012) and the mean consumption of distilled beverages (FAOSTAT, 1993-2011).

**Countries with health expenditure between 500-2000 USD per capita (n=61).**

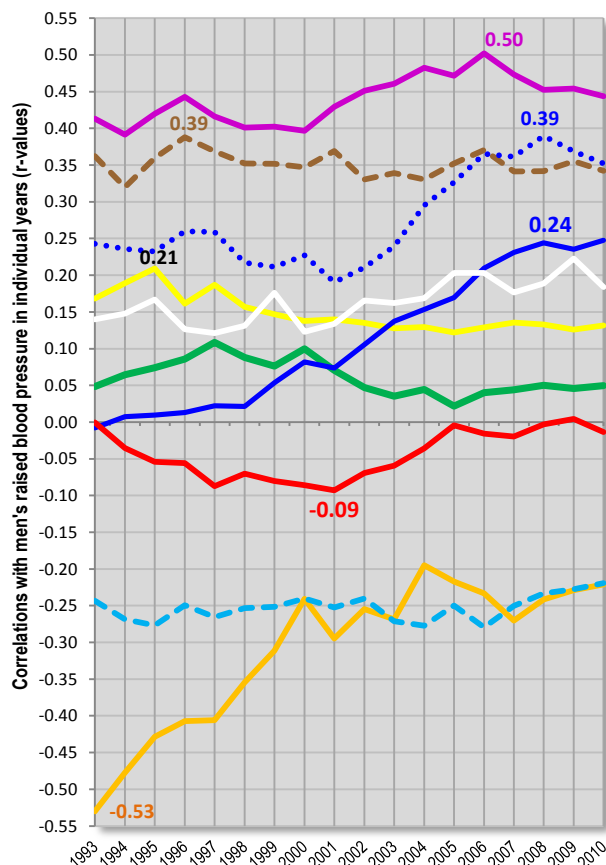

— % CA energy  
 — Alcoholic beverages total  
 — Oranges & Mandarins  
 — Cereals  
 ..... Distilled beverages  
 - - - Fish & Seafood

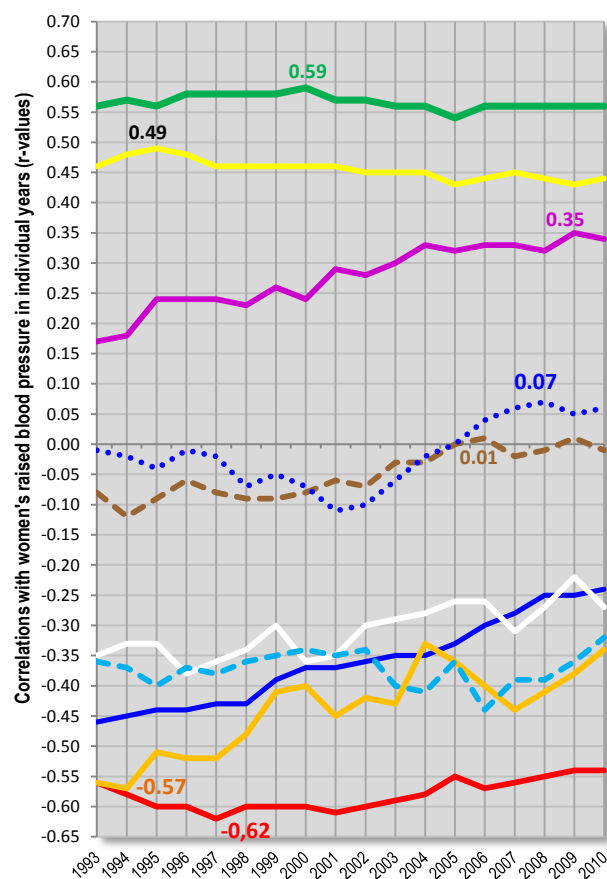

- - - Potatoes  
 — Sunflower oil  
 — Dairy total  
 — Animal protein  
 — % CA energy

**Supplementary Fig. S50.** Temporal changes in correlation coefficients (r-values) between men's raised blood pressure (2010) and 10 food items.

Countries with health expenditure above 500 USD per capita (n=91).

**Supplementary Fig. S51.** Temporal changes in correlation coefficients (r-values) between women's raised blood pressure (2010) and 10 food items.

Countries with health expenditure above 500 USD per capita (n=91).
